# Supplementary material for: Genome-wide analyses of non-syndromic cleft lip with palate identify 14 novel loci and genetic heterogeneity
Source: PubMed Central journal article supplement (PMC5333091; doi:10.1038/ncomms14364), 2017-02-24
Supplement: ncomms14364-s1.pdf [file ncomms14364-s1.pdf]

## Supplementary Figures:

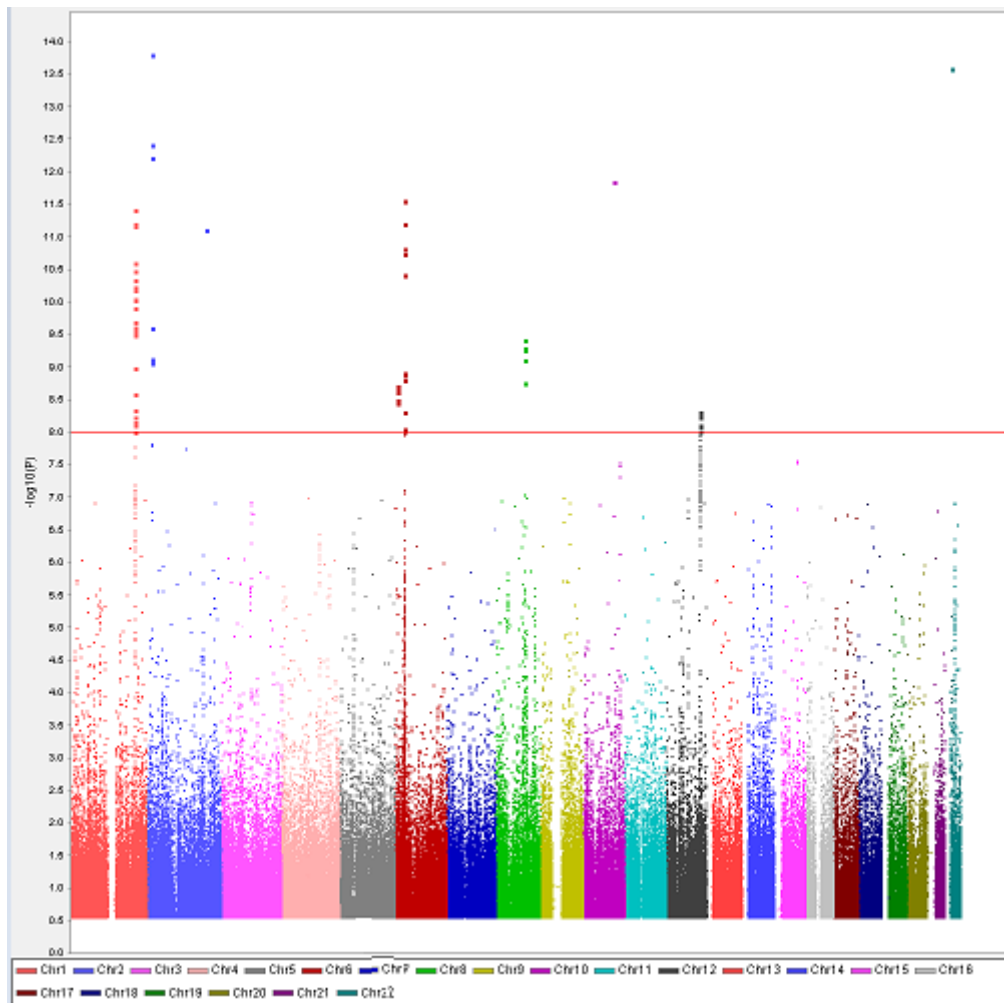

### Supplementary Figure 1| Manhattan plot of the association evidence in discovery

**GWAS stage.** The genome-wide  $P$  values from the Cochran-Armitage trend test on 803,202 SNPs in 2,033 NSCLP cases and 4,051 controls of Chinese Han ancestry are presented. The chromosomal distribution of all  $P$  values (as  $-\log_{10}P$  values) is shown for each chromosome depicted in a different color. The red horizontal line presents a  $P$  value threshold of  $10^{-8}$ .

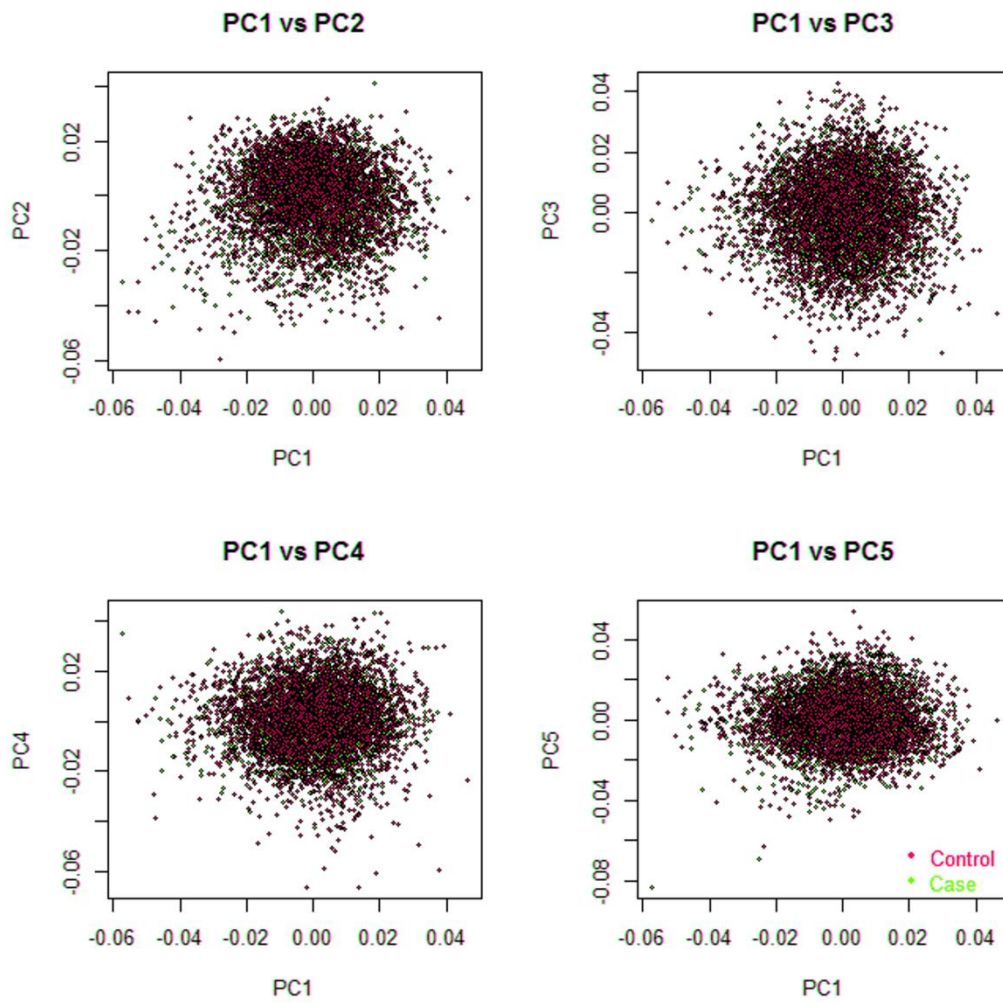

**Supplementary Figure 2|** The principal components analyses (PCA) were performed in 6,147 unrelated samples (2,096 NSCLP cases and 4,051 controls) in the discovery GWAS stage.

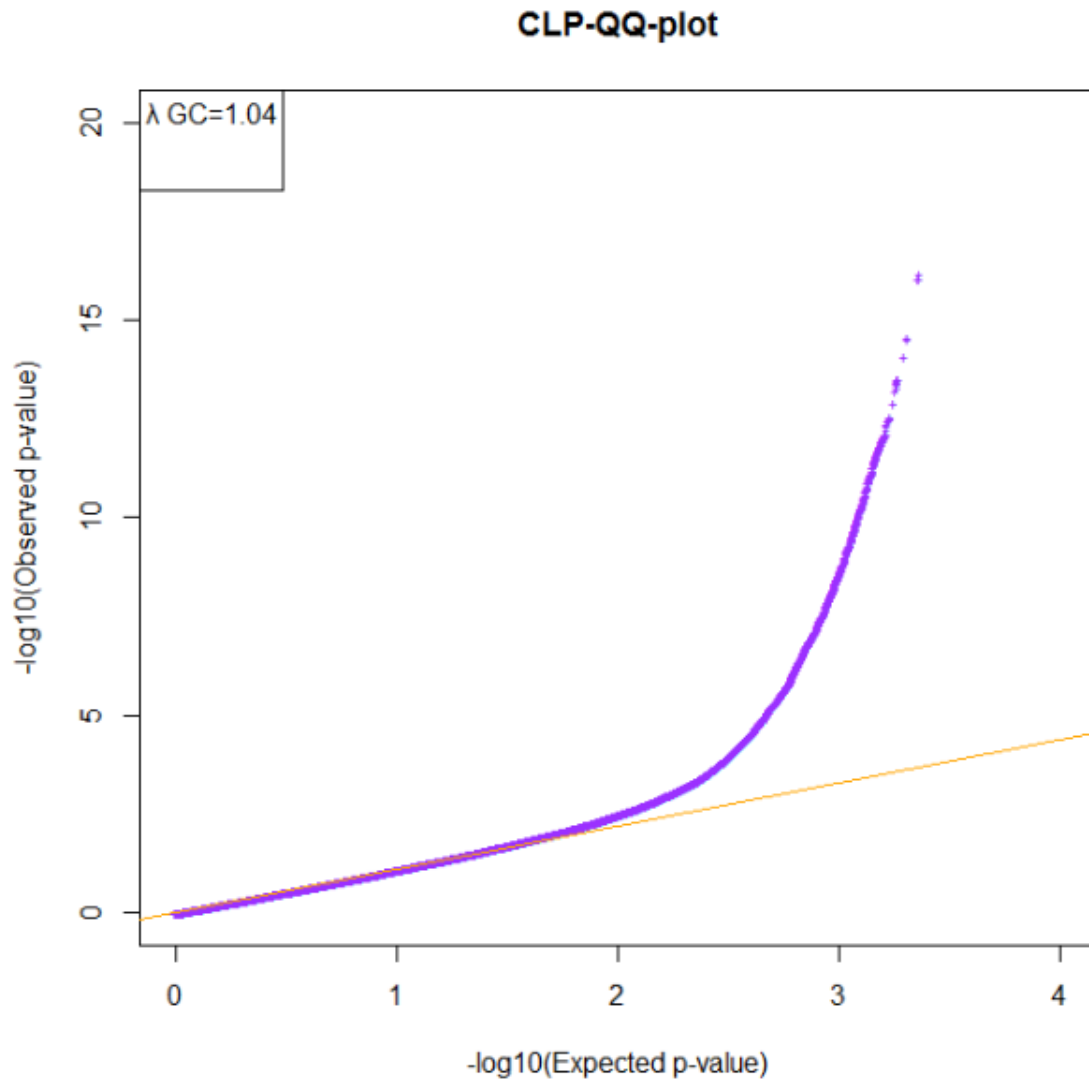

**SupplementaryFigure3| Quantile-quantile (Q-Q) plots** for the observed  $P$  values (using logistic regression test) from discovery GWAS analysis in 2,033 NSCLP cases and 4,051 controls versus the expected null distribution of  $P$  value for association. The plot in purple is for the  $P$  values of all SNPs. The genomic inflation factor ( $\lambda_{GC} = 1.04$ ) shown in purple for all the SNPs passing QC.

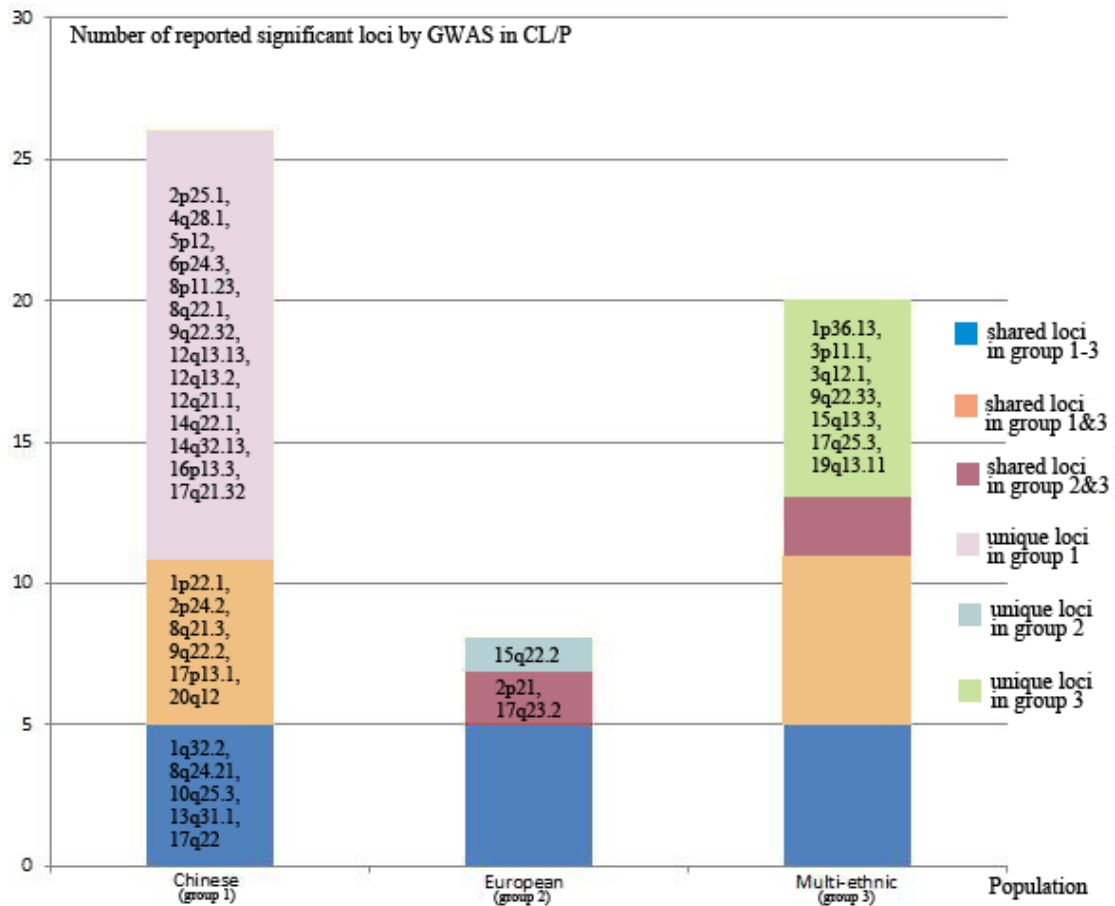

**Supplementary Figure 4 | Summary of significant associated loci with NSCL/P in different populations.** Different colors represent the shared common loci or unique loci among the three groups. Multi-ethnic group include at least two races, such as European and Asian.

(a): 2p25.1 (rs287982)

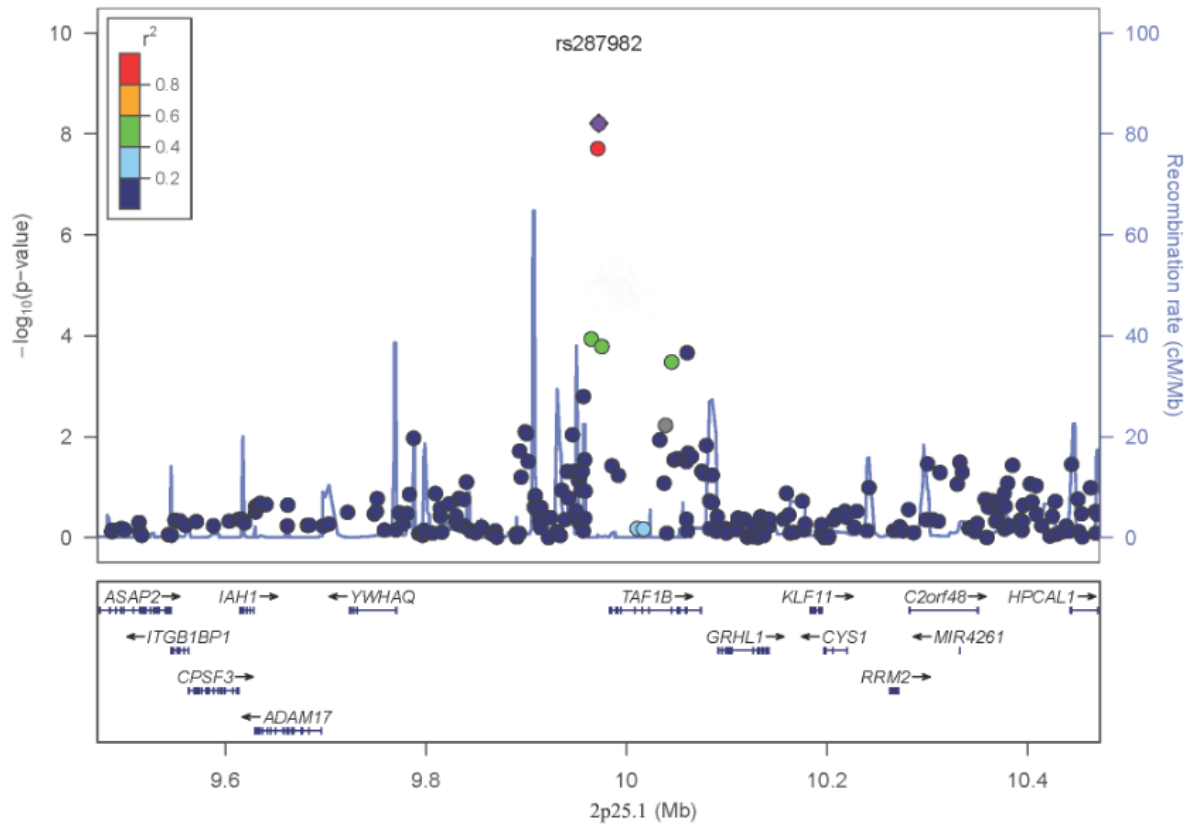

(b): 4p16.2 (rs1907989)

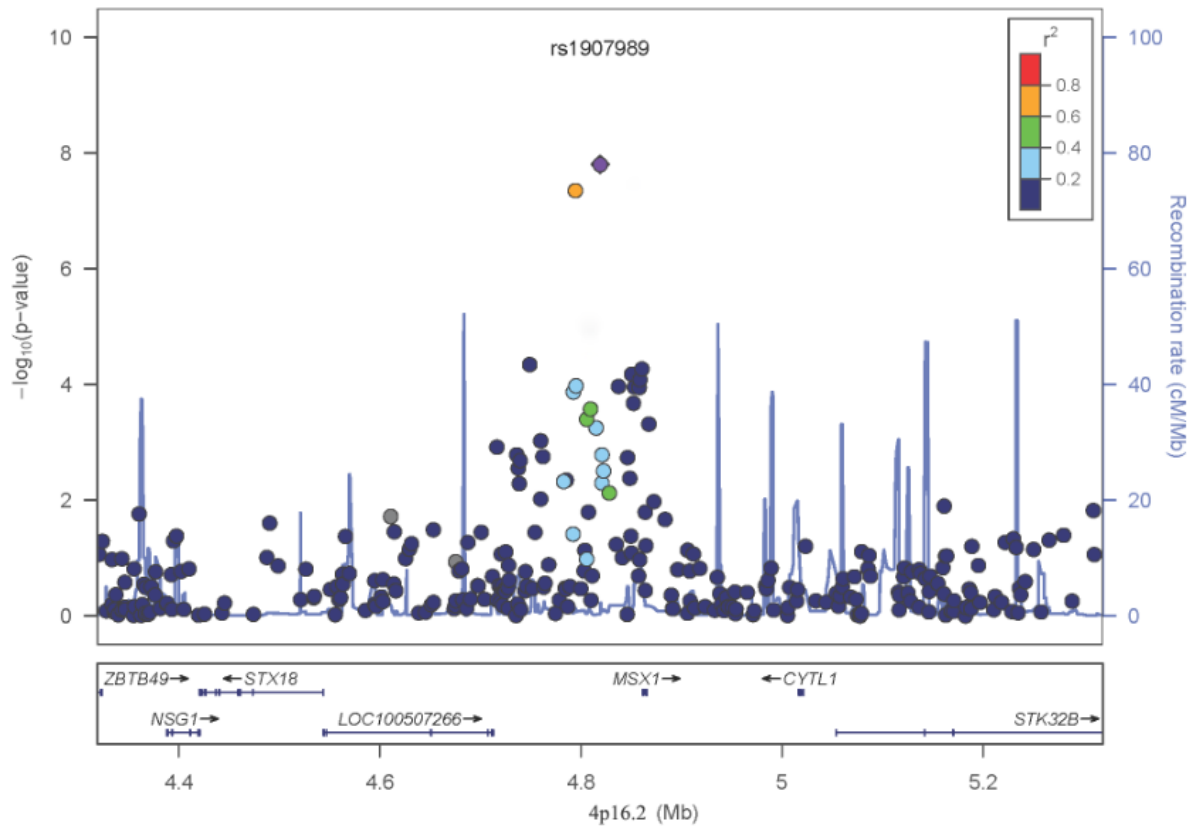

(c): 4q28.1 (rs908822)

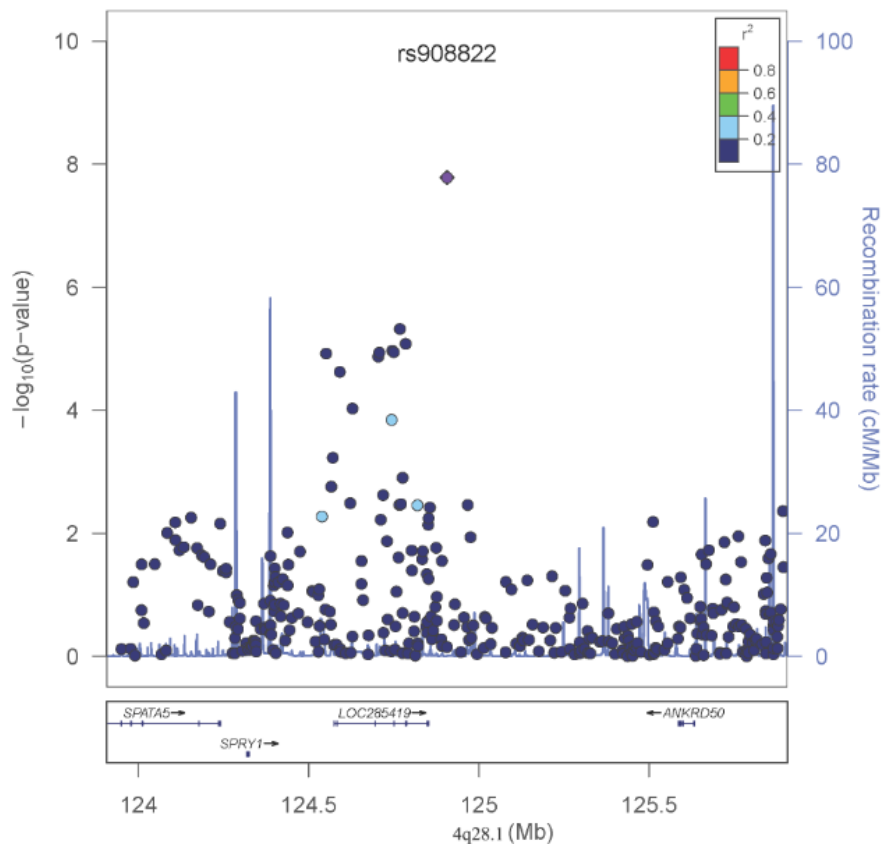

(d): 5p12 (rs10462065)

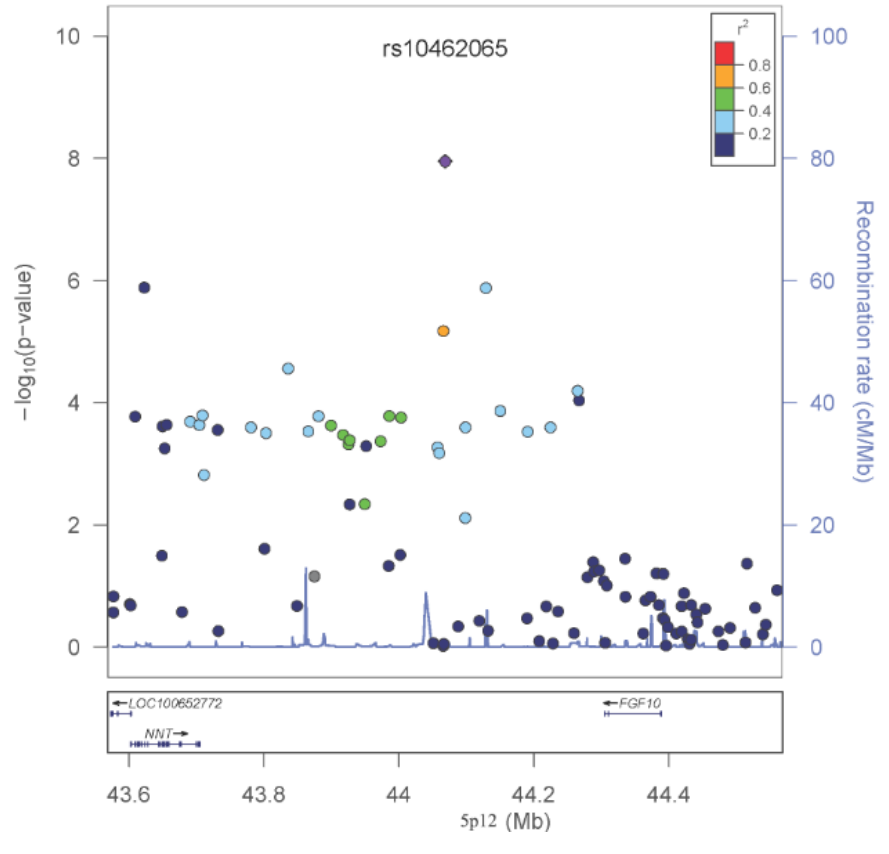

(e): 6p24.3 (rs9381107)

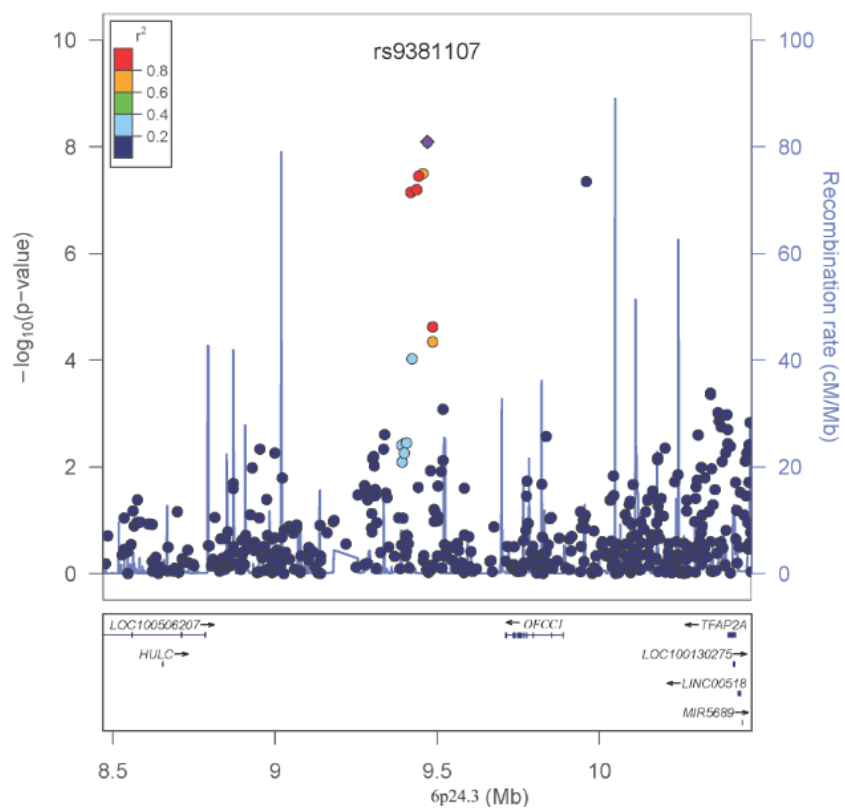

(f): 8p11.23 (rs13317)

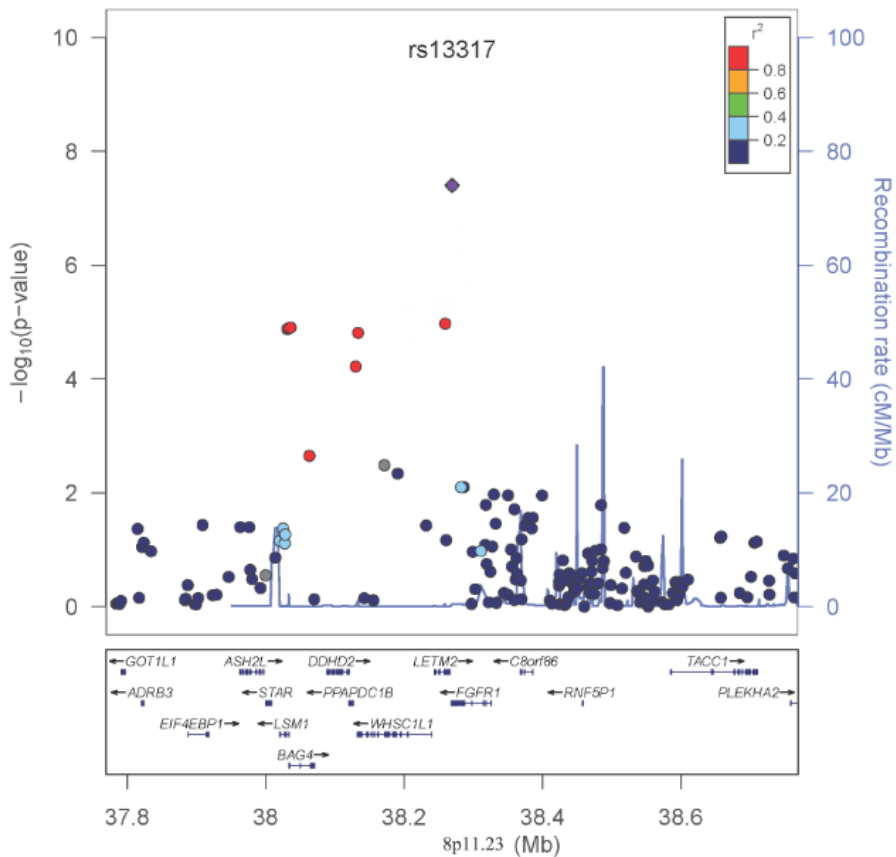

(g): 8q22.1 (rs957448)

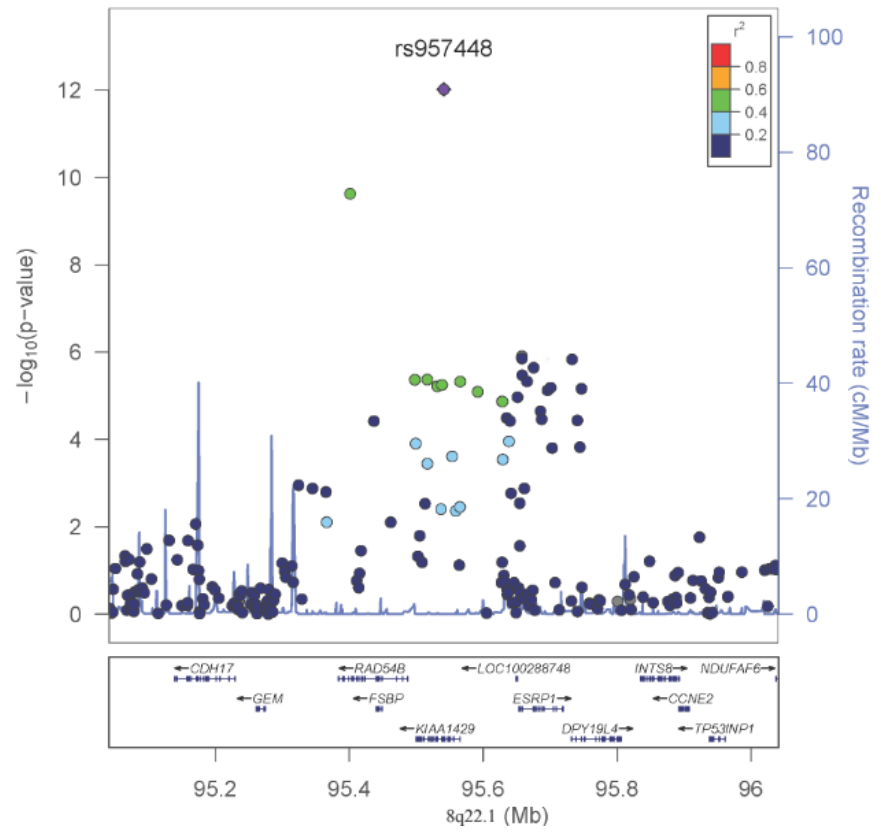

(h): 9q22.32 (rs10512248)

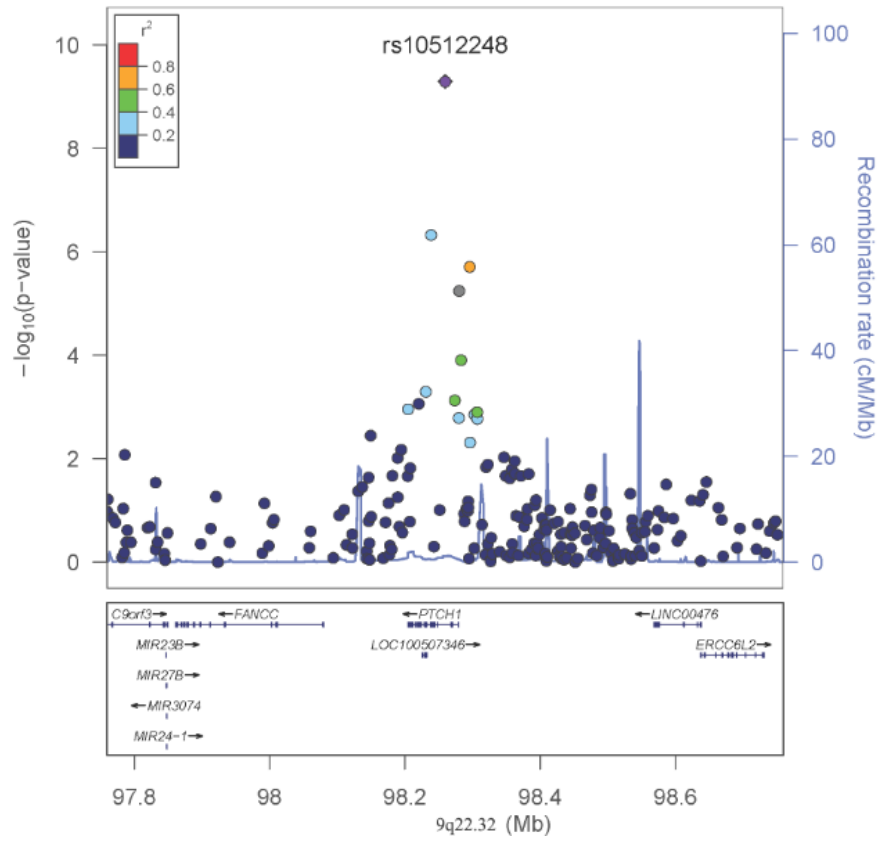



(i): 12q13.13 (rs3741442)

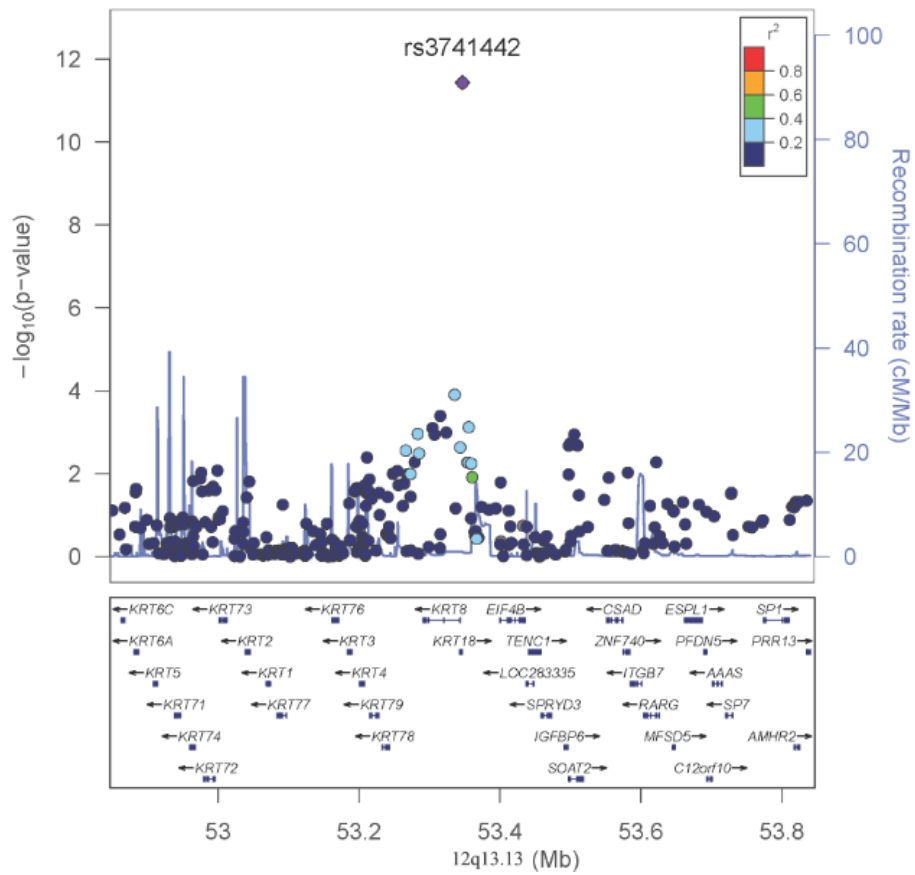

(j): 12q13.2 (rs705704)

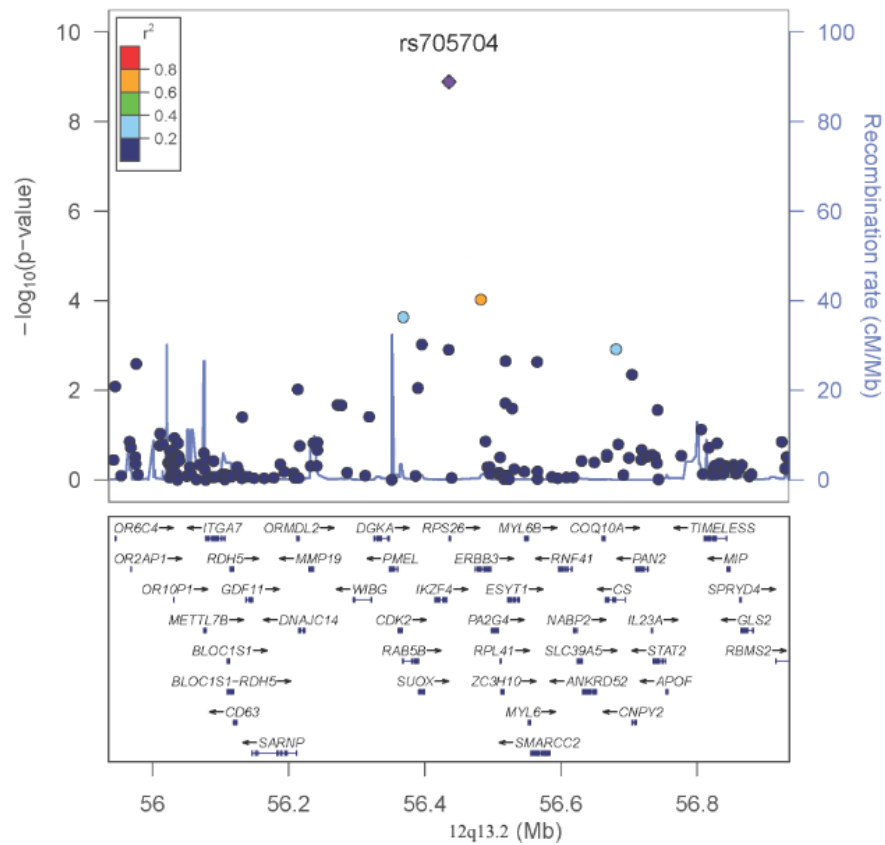

(k): 12q21.1 (rs2304269)

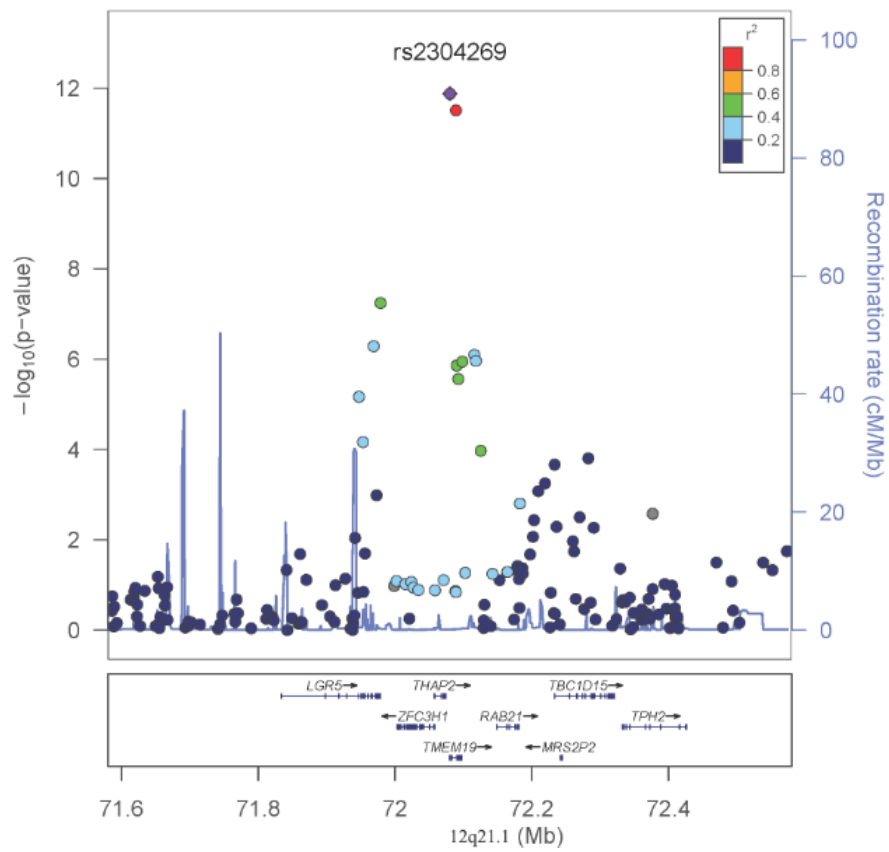

(l): 14q22.1 (rs7148069)

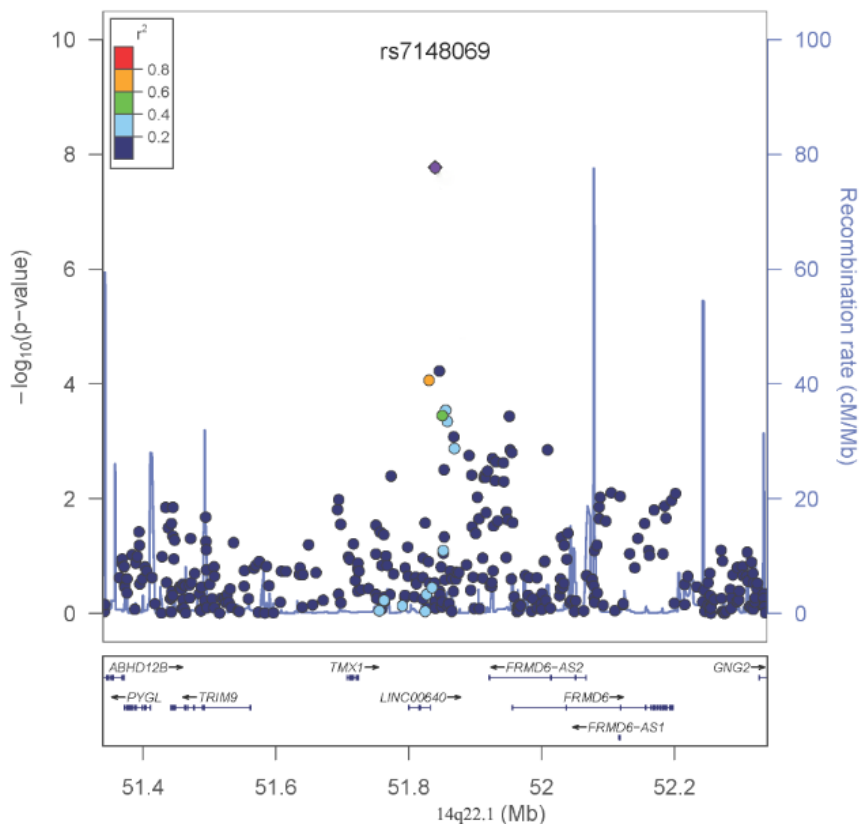

(m): 14q32.13 (rs1243572)

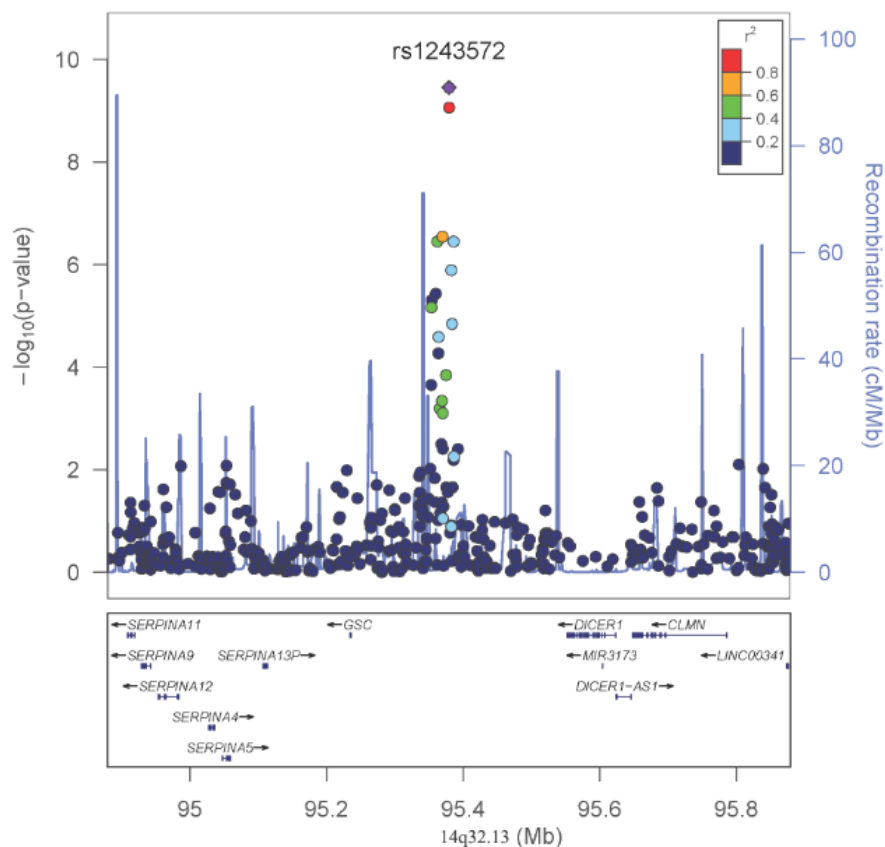

(n): 17q21.32 (rs1838105)

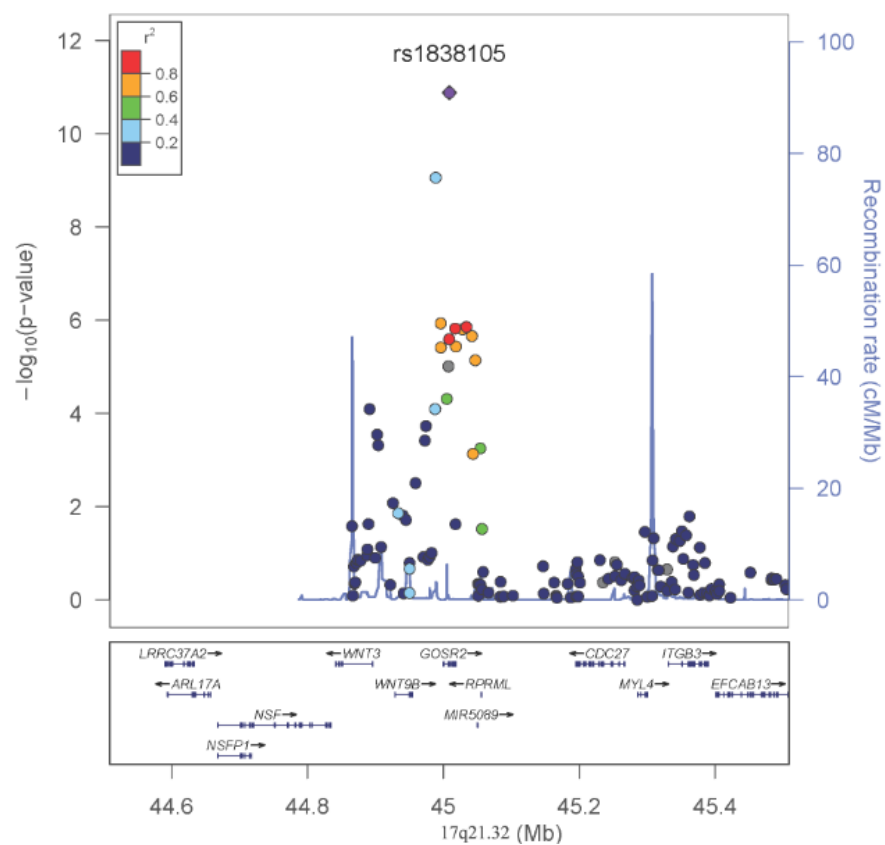

**Supplementary Figure 5 | The scatter plots of the association evidence within 14 loci for NSCLP identified in the current study.** The 14 loci are as following: a: 2p25.1 (rs287982); b: 4p16.2 (rs1907989); c: 4q28.1 (rs908822); d: 5p12 (rs10462065); e: 6p24.3 (rs9381107); f: 8p11.23 (rs13317); g: 8q22.1 (rs957448); h: 9q22.32 (rs10512248); i: 12q13.13 (rs3741442); j: 12q13.2 (rs705704); k: 12q21.1 (rs2304269); l: 14q22.1 (rs7148069); m: 14q32.13 (rs1243572); n: 17q21.32 (rs1838105). The  $P$  values of SNPs (shown as  $-\log_{10}$  values in y-axis, obtained using the Cochran-Armitage trend test) were plotted against their chromosomal map positions ( $x$ -axis). The color of each SNP spot reflects its  $r^2$  with the top SNP (large purple diamond) within each association locus, changing from red to blue. Estimated recombination rates were plotted in light blue. Gene annotations were adapted from the University of California at Santa Cruz Genome Browser (<http://genome.ucsc.edu/>).

a.

RAD54B

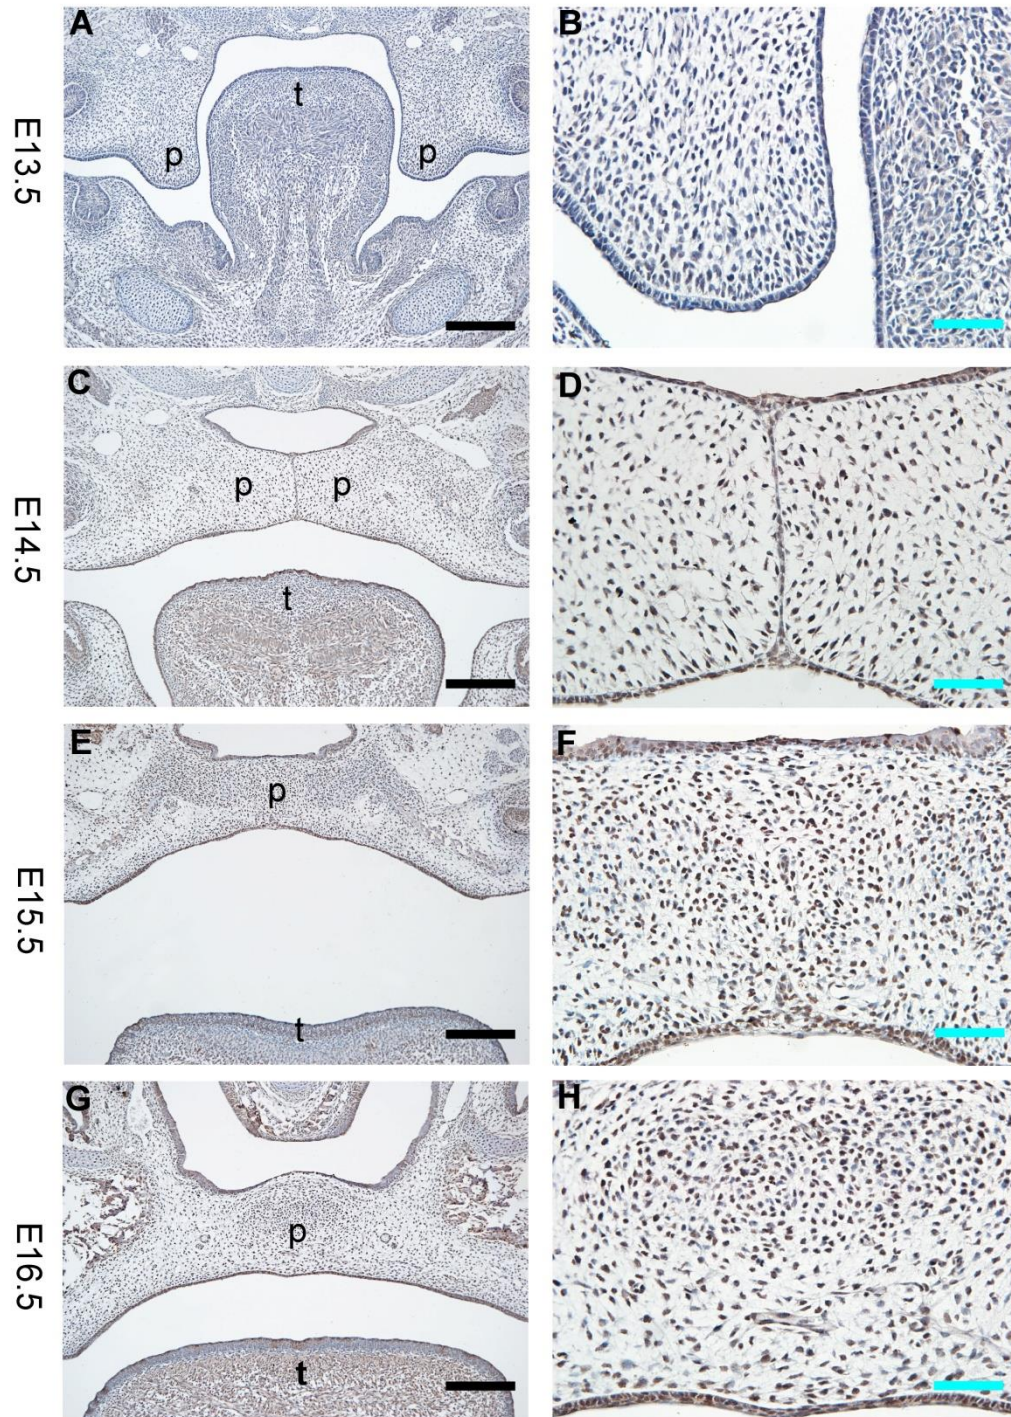

b.

RPS26

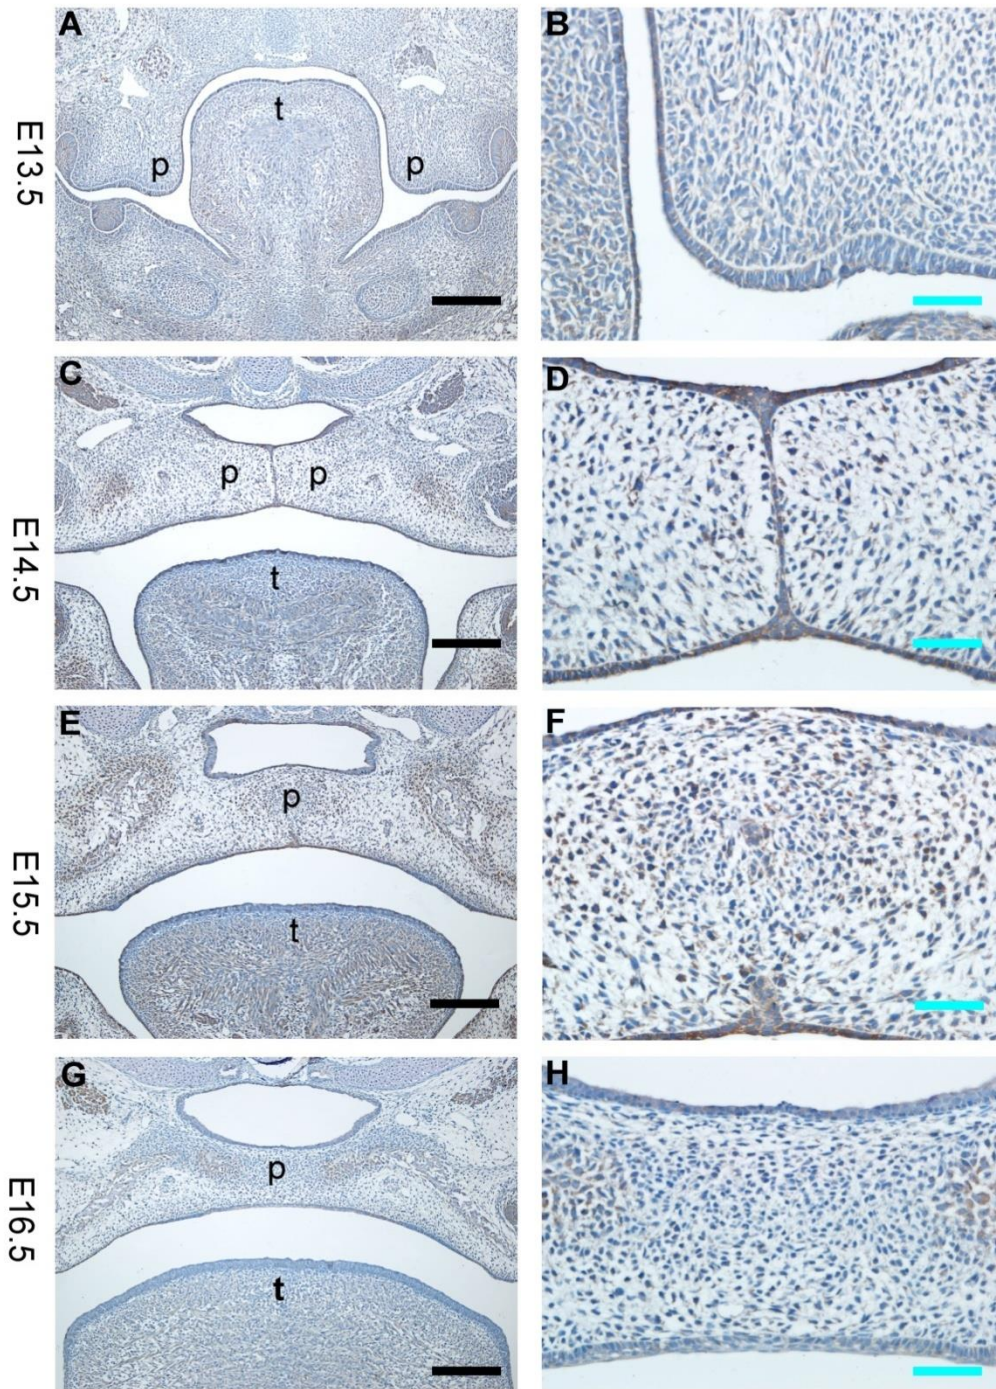

c.

### FAM49A

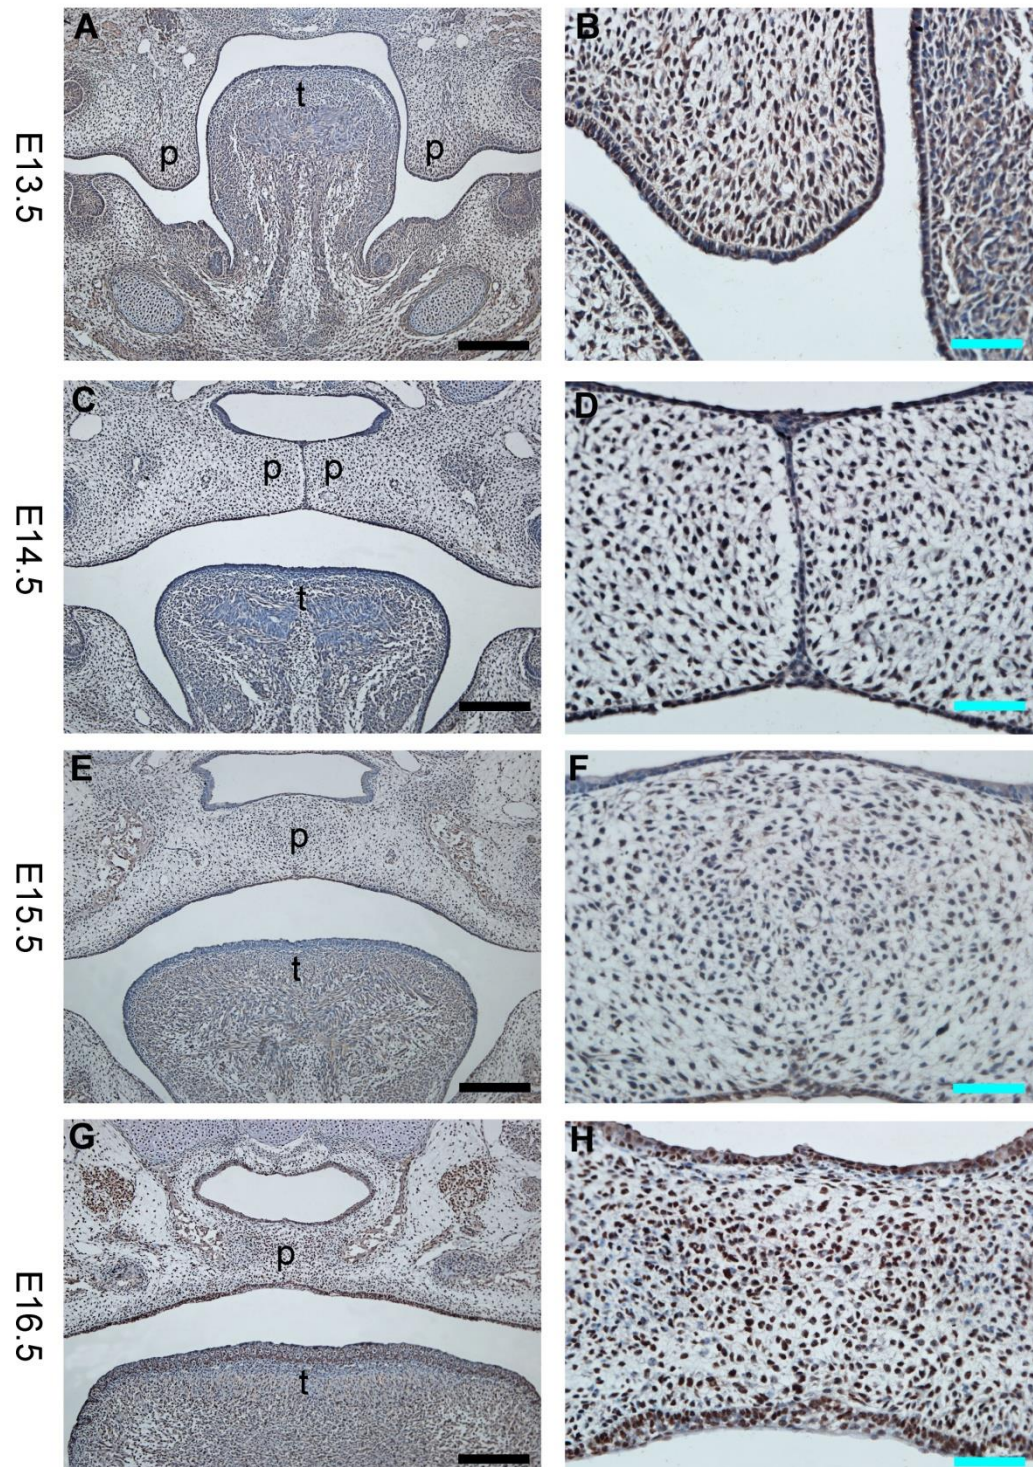

**Supplementary Figure 6 | Expression studies in the mouse.** Immunohistochemistry on mouse embryos from E13.5 to E16.5 shows: a. Rad54b localized in the nucleus of the palatal mesenchymal cells and epithelium cells (C-H) including the MEE during palatal fusion on E14.5 (D). Rad54b expression in palatal tissues increased with development (B, D, F, H). Rps26 localized in the cytoplasm of palatal mesenchymal cells and epithelium cells (A-H) including the MEE during palatal fusion on E14.5 (D). b. Rps26 showed increased expression from E13.5 to E15.5 (A-F) but decreased at E16.5 (G, H). c. Fam49a localized in the nucleus of palatal mesenchymal cells and epithelium cells (A-H). Positive results were stronger at E16.5 in palatal tissues (G, H). n =5; p, palatal shelf; t, tongue; Scale bars: black, 200  $\mu$ m; green, 50  $\mu$ m. B, D, F and H are the magnification of the palate in A, C, E and G.



**Supplementary Tables:**

**Supplementary Table 1. Samples summary in the genome-wide association and replication studies.**

| Stage   | Cohort   | Ethnicity         | Phenotype | Cases                 |                 | Controls    |                 |
|---------|----------|-------------------|-----------|-----------------------|-----------------|-------------|-----------------|
|         |          |                   |           | Sample size           | Male/Female (%) | Sample size | Male/Female (%) |
| GWAS    | cohort 1 | Chinese           | NSCLP     | 2,096                 | 72.0/28.0       | 4,051       | 58.7/41.3       |
| Stage 2 | cohort 2 | Chinese           | NSCLP     | 1,346                 | 72.8/27.2       | 4,542       | 65.7/34.3       |
| Stage 3 | cohort 3 | Chinese           | NSCLO     | 1,104                 | 61.6/38.4       | 3,312*      | 51.8/48.2       |
|         | cohort 4 | Chinese           | NSCPO     | 1,104                 | 41.6/58.4       | 3,312*      | 51.8/48.2       |
| Stage 4 | cohort 5 | Central European  | NSCL/P    | 399                   | 62.4/37.6       | 1,318       | 50.8/49.2       |
|         | cohort 6 | Asian             | NSCL/P    | 861 case-parent trios | 64.5/35.5       | NA          | NA              |
|         | cohort 7 | European American | NSCL/P    | 557 case-parent trios | 64.8/36.2       | NA          | NA              |

NSCLP: non-syndromic cleft lip with palate; NSCLO: non-syndromic cleft lip only;

NSCPO: non-syndromic cleft palate only; NSCL/P: non-syndromic cleft lip with or without palate.

\*The 3,312 controls were shared in cohort 3 and 4.

**Supplementary Table 2. Association results of 146 SNPs in GWAS, NSCLP Replication and Meta analysis of NSCLP.**

| Loci    | SNP         | BP (hg19) | Alleles | GWAS |      |          |                  | NSCLP Replication |      |          |                  | Meta analysis |       |                    |
|---------|-------------|-----------|---------|------|------|----------|------------------|-------------------|------|----------|------------------|---------------|-------|--------------------|
|         |             |           |         | F_A  | F_U  | P        | OR               | F_A               | F_U  | P        | OR               | P(F)          | OR(F) | P <sub>het</sub> * |
| 1p31.3  | rs7554547   | 11973888  | G/A     | 0.45 | 0.52 | 2.89E-05 | 0.78 (0.72-0.84) | 0.47              | 0.47 | 9.39E-01 | 1.00 (0.91-1.09) | 5.47E-07      | 0.86  | 0.0000             |
| 1p36.13 | rs9439713   | 18972776  | A/G     | 0.06 | 0.04 | 2.05E-06 | 1.56 (1.31-1.86) | 0.05              | 0.04 | 2.06E-01 | 1.14 (0.93-1.39) | 5.87E-06      | 1.36  | 0.0453             |
| 1p36.13 | rs742071    | 18979874  | A/C     | 0.06 | 0.04 | 4.73E-05 | 1.47 (1.24-1.74) | 0.05              | 0.04 | 9.17E-03 | 1.30 (1.01-1.59) | 4.26E-07      | 1.40  | 0.4859             |
| 1p36.13 | rs11582254  | 20018077  | A/G     | 0.37 | 0.42 | 1.84E-06 | 0.80 (0.74-0.87) | 0.40              | 0.41 | 2.96E-01 | 0.95 (0.87-1.04) | 8.69E-07      | 0.86  | 0.0106             |
| 1p36.13 | rs1883567   | 20020466  | A/C     | 0.36 | 0.41 | 1.02E-05 | 0.81 (0.75-0.88) | 0.39              | 0.40 | 4.01E-01 | 0.96 (0.88-1.05) | 8.13E-06      | 0.88  | 0.0139             |
| 1p32.2  | rs6588607   | 56586286  | A/C     | 0.22 | 0.25 | 5.70E-06 | 0.83 (0.76-0.91) | 0.24              | 0.24 | 8.86E-01 | 1.01 (0.91-1.11) | 3.78E-03      | 0.91  | 0.0152             |
| 1p32.2  | rs1331862   | 56642998  | G/A     | 0.23 | 0.26 | 3.52E-06 | 0.83 (0.76-0.91) | 0.26              | 0.25 | 3.16E-01 | 1.05 (0.95-1.16) | 2.22E-02      | 0.93  | 0.0025             |
| 1p31.1  | rs277354    | 75291073  | G/A     | 0.23 | 0.26 | 4.13E-05 | 0.86 (0.79-0.94) | 0.25              | 0.25 | 8.47E-01 | 0.99 (0.90-1.09) | 7.86E-03      | 0.91  | 0.0681             |
| 1p31.1  | rs7367789   | 75357094  | A/G     | 0.21 | 0.24 | 1.67E-05 | 0.84 (0.77-0.92) | 0.23              | 0.23 | 9.62E-01 | 1.00 (0.90-1.11) | 4.41E-03      | 0.91  | 0.0319             |
| 1p22.1  | rs4147827   | 94548080  | C/G     | 0.08 | 0.05 | 4.86E-05 | 1.41 (1.21-1.64) | 0.08              | 0.06 | 3.98E-03 | 1.28 (1.08-1.51) | 1.89E-07      | 1.35  | 0.5255             |
| 1p22.1  | rs17461953  | 94551450  | C/A     | 0.08 | 0.05 | 2.68E-05 | 1.42 (1.22-1.65) | 0.08              | 0.06 | 3.01E-03 | 1.29 (1.09-1.52) | 7.04E-08      | 1.36  | 0.5006             |
| 1p22.1  | rs481931    | 94570016  | A/C     | 0.33 | 0.37 | 4.82E-06 | 0.83 (0.77-0.90) | 0.33              | 0.39 | 2.79E-08 | 0.77 (0.71-0.85) | 1.06E-12      | 0.80  | 0.3687             |
| 1p22.1  | rs4147803   | 94582293  | G/C     | 0.29 | 0.33 | 1.22E-06 | 0.81 (0.75-0.88) | 0.29              | 0.34 | 2.27E-06 | 0.80 (0.73-0.88) | 7.97E-12      | 0.81  | 0.8369             |
| 1p13.3  | rs12047887  | 111144007 | A/G     | 0.17 | 0.15 | 4.35E-05 | 1.15 (1.04-1.28) | 0.17              | 0.14 | 2.16E-04 | 1.25 (1.11-1.40) | 7.78E-06      | 1.19  | 0.4277             |
| 1p13.3  | rs4839542   | 111155595 | A/G     | 0.16 | 0.14 | 3.44E-05 | 1.19 (1.07-1.32) | 0.16              | 0.13 | 1.41E-03 | 1.22 (1.08-1.38) | 6.74E-06      | 1.20  | 0.8090             |
| 1q23.3  | rs10918593  | 162030654 | G/A     | 0.33 | 0.29 | 1.31E-05 | 1.22 (1.12-1.32) | 0.31              | 0.31 | 6.58E-01 | 1.02 (0.93-1.12) | 1.19E-04      | 1.13  | 0.0147             |
| 1q32.2  | rs861020    | 209977111 | A/G     | 0.24 | 0.19 | 6.38E-12 | 1.34 (1.23-1.47) | 0.23              | 0.19 | 6.63E-06 | 1.27 (1.15-1.41) | 1.30E-14      | 1.31  | 0.5428             |
| 1q32.2  | rs642961    | 209989270 | A/G     | 0.24 | 0.19 | 3.86E-12 | 1.35 (1.23-1.48) | 0.23              | 0.19 | 2.23E-06 | 1.29 (1.16-1.43) | 2.76E-15      | 1.32  | 0.6061             |
| 1q32.2  | rs2064163   | 210048819 | A/C     | 0.38 | 0.44 | 1.04E-09 | 0.77 (0.71-0.83) | 0.38              | 0.44 | 8.18E-09 | 0.77 (0.71-0.84) | 8.60E-19      | 0.77  | 0.9625             |
| 1q32.2  | rs9430019   | 210050794 | A/G     | 0.31 | 0.26 | 1.77E-07 | 1.27 (1.17-1.38) | 0.30              | 0.26 | 2.58E-05 | 1.23 (1.12-1.35) | 1.68E-12      | 1.25  | 0.6420             |
| 1q32.2  | rs11583395  | 218841163 | A/G     | 0.49 | 0.44 | 4.04E-05 | 1.21 (1.12-1.30) | 0.47              | 0.46 | 2.66E-01 | 1.05 (0.96-1.15) | 1.11E-05      | 1.14  | 0.0378             |
| 1q32.2  | rs201830371 | 218845278 | A/G     | 0.49 | 0.44 | 5.57E-05 | 1.20 (1.12-1.30) | 0.47              | 0.47 | 7.87E-01 | 1.01 (0.93-1.10) | 1.42E-04      | 1.12  | 0.0098             |

|         |            |           |     |      |      |          |                  |      |      |          |                  |          |      |        |
|---------|------------|-----------|-----|------|------|----------|------------------|------|------|----------|------------------|----------|------|--------|
| 2p25.1  | rs287980   | 9971366   | G/A | 0.23 | 0.27 | 1.99E-05 | 0.82 (0.75-0.89) | 0.23 | 0.27 | 5.54E-04 | 0.84 (0.76-0.93) | 1.94E-08 | 0.83 | 0.8120 |
| 2p25.1  | rs287982   | 9972442   | G/A | 0.23 | 0.27 | 1.58E-05 | 0.82 (0.75-0.89) | 0.23 | 0.27 | 2.28E-04 | 0.83 (0.75-0.92) | 6.15E-09 | 0.82 | 0.8981 |
| 2p24.2  | rs10172734 | 16733054  | G/A | 0.26 | 0.32 | 3.85E-13 | 0.76 (0.70-0.83) | 0.26 | 0.33 | 1.58E-11 | 0.72 (0.65-0.79) | 2.89E-20 | 0.74 | 0.4992 |
| 2p24.2  | rs7552     | 16733928  | A/G | 0.24 | 0.30 | 1.57E-14 | 0.74 (0.68-0.81) | 0.24 | 0.31 | 5.64E-12 | 0.71 (0.64-0.78) | 5.83E-22 | 0.73 | 0.5814 |
| 2p22.2  | rs7590255  | 37990079  | G/A | 0.03 | 0.02 | 2.73E-06 | 1.83 (1.43-2.34) | 0.02 | 0.02 | 1.26E-01 | 1.25 (0.94-1.67) | 3.71E-06 | 1.56 | 0.0896 |
| 2q21.1  | rs17491637 | 130176577 | A/G | 0.12 | 0.16 | 1.82E-08 | 0.71 (0.63-0.80) | 0.16 | 0.15 | 3.60E-01 | 1.06 (0.94-1.19) | 4.89E-04 | 0.86 | 0.0000 |
| 2q32.1  | rs11677862 | 184898361 | A/G | 0.38 | 0.42 | 1.17E-05 | 0.82 (0.76-0.89) | 0.41 | 0.41 | 8.72E-01 | 0.99 (0.91-1.09) | 1.26E-04 | 0.89 | 0.0070 |
| 2q32.1  | rs12623132 | 184954425 | A/C | 0.40 | 0.44 | 2.10E-06 | 0.83 (0.77-0.90) | 0.41 | 0.43 | 1.63E-01 | 0.94 (0.86-1.03) | 1.00E-05 | 0.88 | 0.0789 |
| 2q35    | rs6734545  | 220653996 | A/C | 0.20 | 0.18 | 8.61E-05 | 1.16 (1.05-1.27) | 0.21 | 0.17 | 4.61E-05 | 1.25 (1.13-1.40) | 8.03E-07 | 1.20 | 0.3864 |
| 2q37.1  | rs77866552 | 233552664 | A/G | 0.02 | 0.04 | 1.73E-06 | 0.50 (0.39-0.64) | 0.03 | 0.04 | 8.74E-02 | 0.81 (0.64-1.03) | 7.08E-07 | 0.64 | 0.0165 |
| 3p24.3  | rs78991648 | 17152071  | A/G | 0.22 | 0.26 | 6.30E-05 | 0.83 (0.76-0.90) | 0.26 | 0.24 | 3.64E-02 | 1.11 (1.01-1.23) | 8.23E-02 | 0.94 | 0.0000 |
| 3p23    | rs1395165  | 31178850  | A/G | 0.42 | 0.47 | 7.82E-05 | 0.83 (0.77-0.89) | 0.44 | 0.44 | 7.58E-01 | 1.01 (0.93-1.11) | 4.65E-04 | 0.90 | 0.0021 |
| 3p23    | rs12485312 | 31219954  | A/G | 0.41 | 0.46 | 5.96E-05 | 0.83 (0.77-0.90) | 0.43 | 0.43 | 8.86E-01 | 1.01 (0.92-1.10) | 5.27E-04 | 0.90 | 0.0049 |
| 3q12.1  | rs1038294  | 99503728  | A/G | 0.13 | 0.17 | 1.18E-07 | 0.73 (0.66-0.81) | 0.15 | 0.16 | 2.12E-01 | 0.93 (0.82-1.05) | 4.47E-07 | 0.81 | 0.0127 |
| 3q12.1  | rs1688766  | 99647850  | A/G | 0.13 | 0.17 | 1.32E-07 | 0.73 (0.65-0.81) | 0.15 | 0.16 | 2.28E-01 | 0.93 (0.82-1.05) | 4.83E-07 | 0.81 | 0.0113 |
| 3q13.31 | rs9847858  | 117141815 | A/G | 0.32 | 0.35 | 8.86E-05 | 0.85 (0.78-0.92) | 0.33 | 0.33 | 5.87E-01 | 1.03 (0.94-1.12) | 6.63E-03 | 0.92 | 0.0068 |
| 3q26.2  | rs10936656 | 170568001 | A/C | 0.34 | 0.37 | 7.47E-05 | 0.86 (0.79-0.93) | 0.36 | 0.37 | 2.53E-01 | 0.95 (0.87-1.04) | 3.30E-04 | 0.90 | 0.1672 |
| 3q29    | rs17597256 | 196767854 | G/A | 0.24 | 0.27 | 7.80E-05 | 0.85 (0.78-0.93) | 0.24 | 0.27 | 1.24E-02 | 0.88 (0.80-0.97) | 1.48E-05 | 0.86 | 0.7255 |
| 3q29    | rs7649443  | 196931821 | A/G | 0.24 | 0.27 | 8.71E-05 | 0.86 (0.79-0.94) | 0.25 | 0.27 | 4.39E-03 | 0.87 (0.78-0.96) | 9.23E-06 | 0.86 | 0.9600 |
| 4p16.2  | rs34246903 | 4794195   | C/A | 0.38 | 0.43 | 2.57E-05 | 0.82 (0.76-0.89) | 0.40 | 0.43 | 1.09E-02 | 0.89 (0.82-0.97) | 4.45E-08 | 0.85 | 0.2344 |
| 4p16.2  | rs1907989  | 4818925   | A/G | 0.46 | 0.51 | 2.29E-06 | 0.81 (0.75-0.87) | 0.48 | 0.50 | 1.94E-02 | 0.90 (0.83-0.98) | 1.58E-08 | 0.85 | 0.1130 |
| 4q28.1  | rs7692299  | 124710584 | A/G | 0.09 | 0.06 | 3.72E-07 | 1.49 (1.30-1.73) | 0.07 | 0.07 | 2.60E-01 | 1.10 (0.93-1.31) | 9.29E-07 | 1.32 | 0.0180 |
| 4q28.1  | rs908822   | 124906257 | A/G | 0.10 | 0.07 | 6.13E-07 | 1.46 (1.28-1.66) | 0.10 | 0.09 | 4.46E-02 | 1.16 (1.00-1.34) | 4.33E-08 | 1.31 | 0.0545 |
| 4q31.3  | rs7686589  | 151337243 | A/G | 0.37 | 0.33 | 3.08E-05 | 1.18 (1.09-1.28) | 0.36 | 0.35 | 4.63E-01 | 1.03 (0.95-1.13) | 3.05E-04 | 1.12 | 0.0563 |
| 4q31.3  | rs66509882 | 151543429 | C/A | 0.37 | 0.33 | 3.41E-06 | 1.20 (1.11-1.30) | 0.35 | 0.35 | 9.55E-01 | 1.00 (0.92-1.10) | 4.71E-04 | 1.11 | 0.0102 |
| 4q32.1  | rs4417922  | 157006346 | G/A | 0.30 | 0.34 | 1.55E-06 | 0.82 (0.76-0.89) | 0.32 | 0.32 | 9.49E-01 | 1.00 (0.91-1.09) | 4.59E-04 | 0.90 | 0.0085 |

|         |            |           |     |      |      |          |                  |      |      |          |                  |          |      |        |
|---------|------------|-----------|-----|------|------|----------|------------------|------|------|----------|------------------|----------|------|--------|
| 4q34.3  | rs2333571  | 177761552 | A/G | 0.34 | 0.36 | 7.18E-05 | 0.89 (0.82-0.96) | 0.35 | 0.38 | 3.41E-02 | 0.91 (0.83-0.99) | 3.33E-04 | 0.90 | 0.8141 |
| 4q34.3  | rs13124707 | 177802518 | G/A | 0.35 | 0.38 | 6.52E-05 | 0.88 (0.82-0.96) | 0.36 | 0.39 | 7.10E-03 | 0.88 (0.81-0.97) | 4.48E-05 | 0.88 | 0.9965 |
| 5p12    | rs10462065 | 44068846  | A/C | 0.24 | 0.20 | 3.51E-07 | 1.26 (1.15-1.38) | 0.23 | 0.20 | 2.04E-03 | 1.18 (1.06-1.31) | 1.12E-08 | 1.22 | 0.4835 |
| 5p12    | rs4242107  | 44129083  | A/G | 0.44 | 0.40 | 6.08E-07 | 1.17 (1.09-1.26) | 0.43 | 0.40 | 7.44E-03 | 1.13 (1.03-1.23) | 1.32E-06 | 1.15 | 0.5979 |
| 5p12    | rs10462084 | 44901349  | G/A | 0.03 | 0.05 | 2.18E-05 | 0.68 (0.55-0.83) | 0.04 | 0.05 | 3.78E-02 | 0.80 (0.64-0.99) | 2.52E-05 | 0.73 | 0.3877 |
| 6p24.3  | rs7771515  | 9442330   | A/G | 0.35 | 0.40 | 2.41E-09 | 0.80 (0.74-0.87) | 0.38 | 0.40 | 1.17E-01 | 0.93 (0.85-1.02) | 2.33E-07 | 0.86 | 0.0322 |
| 6p24.3  | rs9381107  | 9469238   | A/G | 0.31 | 0.37 | 1.97E-09 | 0.79 (0.73-0.86) | 0.33 | 0.36 | 1.40E-02 | 0.89 (0.81-0.98) | 2.72E-09 | 0.83 | 0.0900 |
| 6p24.3  | rs11965246 | 9959207   | C/A | 0.04 | 0.07 | 1.21E-05 | 0.61 (0.51-0.73) | 0.07 | 0.06 | 2.16E-01 | 1.12 (0.94-1.33) | 4.09E-03 | 0.83 | 0.0000 |
| 6p23    | rs12203226 | 14951008  | A/C | 0.43 | 0.39 | 3.24E-06 | 1.20 (1.11-1.30) | 0.39 | 0.40 | 2.17E-01 | 0.95 (0.87-1.03) | 6.66E-03 | 1.08 | 0.0006 |
| 7p21.2  | rs10260512 | 14856700  | A/G | 0.40 | 0.44 | 4.98E-05 | 0.87 (0.80-0.94) | 0.40 | 0.41 | 2.39E-01 | 0.95 (0.87-1.04) | 4.61E-04 | 0.90 | 0.2182 |
| 7p21.1  | rs76523544 | 19308308  | C/A | 0.08 | 0.11 | 2.17E-05 | 0.67 (0.58-0.77) | 0.10 | 0.09 | 6.88E-01 | 1.03 (0.89-1.19) | 9.80E-05 | 0.82 | 0.0000 |
| 7q36.2  | rs10256809 | 155079596 | A/G | 0.07 | 0.10 | 3.19E-07 | 0.65 (0.56-0.75) | 0.10 | 0.09 | 2.68E-01 | 1.09 (0.94-1.26) | 6.84E-04 | 0.84 | 0.0000 |
| 8p22    | rs17227506 | 13458794  | A/G | 0.39 | 0.44 | 8.24E-06 | 0.82 (0.76-0.89) | 0.40 | 0.42 | 1.46E-01 | 0.94 (0.86-1.02) | 2.70E-06 | 0.87 | 0.0575 |
| 8p11.23 | rs13317    | 38269514  | G/A | 0.30 | 0.34 | 4.10E-06 | 0.83 (0.77-0.90) | 0.32 | 0.35 | 7.43E-03 | 0.88 (0.80-0.97) | 3.96E-08 | 0.85 | 0.4601 |
| 8p11.23 | rs3925     | 38281658  | A/G | 0.27 | 0.32 | 1.47E-06 | 0.81 (0.74-0.88) | 0.30 | 0.32 | 3.24E-02 | 0.90 (0.82-0.99) | 2.66E-07 | 0.85 | 0.1398 |
| 8q21.3  | rs12543318 | 88868340  | A/C | 0.32 | 0.38 | 2.43E-07 | 0.78 (0.72-0.84) | 0.33 | 0.37 | 7.83E-04 | 0.86 (0.78-0.94) | 8.80E-12 | 0.81 | 0.2050 |
| 8q21.3  | rs1034832  | 88918331  | C/A | 0.31 | 0.36 | 5.92E-07 | 0.79 (0.73-0.85) | 0.32 | 0.35 | 1.65E-03 | 0.86 (0.79-0.95) | 1.35E-10 | 0.82 | 0.2243 |
| 8q22.1  | rs12681366 | 95401265  | G/A | 0.44 | 0.49 | 2.95E-06 | 0.82 (0.76-0.88) | 0.44 | 0.48 | 2.48E-04 | 0.85 (0.78-0.93) | 2.35E-10 | 0.83 | 0.5965 |
| 8q22.1  | rs957448   | 95541302  | G/A | 0.44 | 0.50 | 3.78E-10 | 0.78 (0.72-0.84) | 0.46 | 0.49 | 7.59E-04 | 0.86 (0.79-0.94) | 9.60E-13 | 0.81 | 0.1260 |
| 8q22.2  | rs11774066 | 99455311  | A/G | 0.42 | 0.38 | 8.65E-05 | 1.18 (1.09-1.28) | 0.42 | 0.39 | 3.85E-03 | 1.14 (1.04-1.24) | 3.39E-07 | 1.16 | 0.6166 |
| 8q22.2  | rs1487022  | 100529826 | A/C | 0.44 | 0.39 | 5.64E-05 | 1.19 (1.10-1.28) | 0.44 | 0.41 | 1.43E-03 | 1.15 (1.06-1.26) | 7.84E-08 | 1.17 | 0.7214 |
| 8q24.12 | rs1993392  | 121240646 | G/A | 0.13 | 0.16 | 6.63E-06 | 0.78 (0.70-0.87) | 0.15 | 0.15 | 4.74E-01 | 0.96 (0.85-1.08) | 1.57E-04 | 0.85 | 0.0319 |
| 8q24.21 | rs7845615  | 129888794 | A/G | 0.22 | 0.18 | 5.11E-06 | 1.28 (1.17-1.41) | 0.20 | 0.17 | 8.59E-05 | 1.25 (1.12-1.39) | 1.03E-10 | 1.27 | 0.8110 |
| 8q24.21 | rs7017252  | 129950844 | A/G | 0.08 | 0.05 | 3.27E-06 | 1.59 (1.36-1.85) | 0.07 | 0.05 | 4.18E-08 | 1.62 (1.36-1.93) | 8.47E-16 | 1.60 | 0.8960 |
| 9p24.1  | rs327753   | 7793309   | G/A | 0.28 | 0.32 | 8.34E-05 | 0.83 (0.77-0.90) | 0.30 | 0.30 | 9.01E-01 | 1.01 (0.92-1.11) | 1.45E-03 | 0.90 | 0.0094 |
| 9p24.1  | rs2990600  | 7796329   | C/A | 0.27 | 0.31 | 3.47E-05 | 0.82 (0.76-0.89) | 0.30 | 0.29 | 7.55E-01 | 1.02 (0.92-1.12) | 1.26E-03 | 0.90 | 0.0043 |

|          |            |           |     |      |      |          |                  |      |      |          |                  |          |      |        |
|----------|------------|-----------|-----|------|------|----------|------------------|------|------|----------|------------------|----------|------|--------|
| 9p23     | rs408960   | 9069839   | G/A | 0.45 | 0.42 | 5.34E-05 | 1.14 (1.05-1.23) | 0.45 | 0.45 | 8.99E-01 | 1.01 (0.92-1.10) | 1.02E-02 | 1.08 | 0.0717 |
| 9p23     | rs324475   | 9077607   | C/A | 0.44 | 0.41 | 9.27E-05 | 1.13 (1.05-1.22) | 0.44 | 0.44 | 7.77E-01 | 1.01 (0.93-1.10) | 1.05E-02 | 1.08 | 0.1111 |
| 9p23     | rs77401103 | 10546603  | G/A | 0.06 | 0.09 | 5.74E-07 | 0.64 (0.55-0.75) | 0.08 | 0.09 | 7.84E-01 | 0.98 (0.84-1.14) | 3.54E-05 | 0.79 | 0.0009 |
| 9p23     | rs542733   | 14098867  | G/A | 0.40 | 0.45 | 1.75E-05 | 0.84 (0.76-0.90) | 0.43 | 0.42 | 5.58E-01 | 1.03 (0.94-1.12) | 2.31E-03 | 0.91 | 0.0024 |
| 9p23     | rs498010   | 14116484  | A/G | 0.29 | 0.33 | 6.24E-05 | 0.83 (0.77-0.90) | 0.30 | 0.31 | 9.47E-01 | 1.00 (0.91-1.10) | 9.05E-04 | 0.90 | 0.0136 |
| 9p21.3   | rs35825512 | 20167602  | A/G | 0.03 | 0.05 | 5.39E-05 | 0.63 (0.51-0.77) | 0.04 | 0.03 | 1.38E-02 | 1.32 (1.06-1.64) | 1.43E-01 | 0.89 | 0.0000 |
| 9p21.3   | rs7863754  | 20168739  | A/G | 0.03 | 0.05 | 4.11E-05 | 0.63 (0.51-0.78) | 0.04 | 0.03 | 9.06E-03 | 1.34 (1.07-1.67) | 1.88E-01 | 0.90 | 0.0000 |
| 9q22.2   | rs7871395  | 92209587  | A/G | 0.30 | 0.26 | 4.54E-05 | 1.23 (1.13-1.34) | 0.29 | 0.26 | 1.07E-03 | 1.17 (1.07-1.29) | 6.06E-09 | 1.21 | 0.5782 |
| 9q22.32  | rs10512248 | 98259703  | C/A | 0.29 | 0.34 | 1.80E-07 | 0.79 (0.73-0.86) | 0.30 | 0.33 | 3.19E-03 | 0.87 (0.79-0.95) | 5.10E-10 | 0.82 | 0.2026 |
| 9q22.32  | rs28361526 | 98295863  | A/G | 0.30 | 0.34 | 1.65E-05 | 0.83 (0.77-0.90) | 0.31 | 0.34 | 3.02E-02 | 0.90 (0.82-0.99) | 1.95E-06 | 0.86 | 0.2949 |
| 9q33.1   | rs13294988 | 119099873 | G/A | 0.47 | 0.43 | 1.23E-05 | 1.17 (1.08-1.26) | 0.45 | 0.43 | 2.22E-02 | 1.11 (1.02-1.21) | 6.68E-06 | 1.14 | 0.4994 |
| 10q24.2  | rs474558   | 99695194  | A/C | 0.26 | 0.20 | 1.43E-12 | 1.40 (1.28-1.53) | 0.25 | 0.26 | 2.62E-01 | 0.94 (0.86-1.04) | 5.05E-06 | 1.17 | 0.0000 |
| 10q25.3  | rs6585429  | 118893231 | G/A | 0.39 | 0.44 | 4.92E-08 | 0.81 (0.75-0.87) | 0.39 | 0.45 | 2.22E-06 | 0.81 (0.74-0.88) | 7.14E-13 | 0.81 | 0.9967 |
| 11q13.3  | rs12792211 | 69025553  | A/G | 0.26 | 0.23 | 9.52E-05 | 1.21 (1.11-1.32) | 0.26 | 0.24 | 1.69E-01 | 1.07 (0.97-1.18) | 4.90E-05 | 1.15 | 0.1364 |
| 12q13.13 | rs3741442  | 53346750  | G/A | 0.46 | 0.41 | 1.17E-06 | 1.22 (1.13-1.32) | 0.46 | 0.41 | 3.36E-06 | 1.23 (1.13-1.34) | 3.72E-12 | 1.22 | 0.9598 |
| 12q13.2  | rs705704   | 56435412  | A/G | 0.27 | 0.23 | 4.39E-05 | 1.22 (1.12-1.33) | 0.28 | 0.24 | 5.97E-05 | 1.22 (1.11-1.34) | 1.29E-09 | 1.22 | 0.9839 |
| 12q21.1  | rs2304269  | 72080272  | G/A | 0.38 | 0.44 | 1.07E-07 | 0.79 (0.73-0.85) | 0.41 | 0.45 | 1.12E-04 | 0.84 (0.77-0.92) | 1.32E-12 | 0.81 | 0.3903 |
| 12q21.1  | rs7967428  | 72089040  | G/A | 0.38 | 0.44 | 1.63E-07 | 0.79 (0.73-0.85) | 0.41 | 0.45 | 1.57E-04 | 0.84 (0.77-0.92) | 3.08E-12 | 0.81 | 0.3871 |
| 12q24.11 | rs2188380  | 111386127 | G/A | 0.12 | 0.17 | 5.75E-09 | 0.67 (0.60-0.74) | 0.15 | 0.15 | 9.18E-01 | 1.01 (0.89-1.14) | 1.49E-07 | 0.80 | 0.0000 |
| 12q24.11 | rs12229654 | 111414461 | C/A | 0.13 | 0.18 | 2.59E-08 | 0.68 (0.61-0.76) | 0.15 | 0.16 | 4.22E-01 | 0.95 (0.85-1.07) | 1.06E-08 | 0.79 | 0.0000 |
| 12q24.11 | rs4766453  | 111692124 | A/G | 0.51 | 0.47 | 5.13E-05 | 1.20 (1.12-1.30) | 0.49 | 0.47 | 1.92E-01 | 1.06 (0.97-1.15) | 7.76E-06 | 1.14 | 0.0563 |
| 12q24.13 | rs11066150 | 112518803 | A/G | 0.34 | 0.42 | 5.21E-09 | 0.72 (0.67-0.78) | 0.35 | 0.37 | 7.32E-02 | 0.92 (0.84-1.01) | 3.41E-13 | 0.80 | 0.0006 |
| 12q24.13 | rs12229892 | 112923393 | A/G | 0.41 | 0.48 | 7.86E-09 | 0.75 (0.69-0.80) | 0.43 | 0.44 | 2.92E-01 | 0.95 (0.87-1.04) | 1.84E-10 | 0.83 | 0.0000 |
| 13q31.1  | rs9545308  | 80639405  | A/C | 0.15 | 0.12 | 4.09E-05 | 1.30 (1.17-1.45) | 0.14 | 0.11 | 2.34E-04 | 1.27 (1.12-1.44) | 2.00E-09 | 1.29 | 0.8103 |
| 14q13.2  | rs1168980  | 36400983  | C/A | 0.16 | 0.20 | 3.49E-05 | 0.80 (0.73-0.88) | 0.20 | 0.19 | 1.63E-01 | 1.08 (0.97-1.21) | 2.18E-02 | 0.92 | 0.0005 |
| 14q13.2  | rs17103683 | 36426134  | A/G | 0.18 | 0.21 | 7.09E-06 | 0.79 (0.71-0.86) | 0.21 | 0.20 | 1.65E-01 | 1.08 (0.97-1.20) | 7.12E-03 | 0.91 | 0.0000 |

|          |             |          |     |      |      |          |                  |      |      |          |                  |          |      |        |
|----------|-------------|----------|-----|------|------|----------|------------------|------|------|----------|------------------|----------|------|--------|
| 14q13.3  | rs1956424   | 37531902 | A/G | 0.27 | 0.24 | 2.33E-07 | 1.19 (1.10-1.30) | 0.25 | 0.25 | 9.29E-01 | 1.01 (0.91-1.11) | 1.91E-03 | 1.11 | 0.0265 |
| 14q13.3  | rs10133673  | 37537352 | G/A | 0.27 | 0.24 | 4.49E-07 | 1.19 (1.09-1.29) | 0.25 | 0.23 | 4.25E-03 | 1.16 (1.05-1.28) | 1.44E-06 | 1.17 | 0.8053 |
| 14q22.1  | rs7148069   | 51839645 | A/G | 0.23 | 0.19 | 1.94E-05 | 1.27 (1.16-1.40) | 0.22 | 0.20 | 7.21E-03 | 1.16 (1.04-1.28) | 1.69E-08 | 1.22 | 0.2538 |
| 14q22.1  | rs10134081  | 51848843 | G/A | 0.12 | 0.09 | 5.00E-06 | 1.41 (1.25-1.59) | 0.12 | 0.10 | 8.72E-02 | 1.13 (0.98-1.29) | 1.23E-07 | 1.28 | 0.0382 |
| 14q24.3  | rs9671386   | 75151047 | G/A | 0.27 | 0.30 | 7.93E-05 | 0.87 (0.80-0.94) | 0.28 | 0.28 | 9.95E-01 | 1.00 (0.91-1.10) | 1.12E-02 | 0.92 | 0.0534 |
| 14q32.13 | rs1243572   | 95379499 | G/A | 0.48 | 0.42 | 1.37E-07 | 1.26 (1.17-1.36) | 0.45 | 0.42 | 6.09E-03 | 1.13 (1.04-1.23) | 3.52E-10 | 1.20 | 0.1138 |
| 14q32.13 | rs1243573   | 95379583 | C/A | 0.48 | 0.42 | 2.83E-07 | 1.25 (1.16-1.35) | 0.45 | 0.42 | 7.30E-03 | 1.13 (1.03-1.23) | 8.61E-10 | 1.20 | 0.1178 |
| 15q22.2  | rs78512626  | 61432877 | C/A | 0.12 | 0.15 | 8.05E-06 | 0.76 (0.67-0.85) | 0.14 | 0.15 | 3.84E-01 | 0.95 (0.84-1.07) | 7.02E-05 | 0.84 | 0.0261 |
| 15q24.1  | rs2289187   | 74744399 | G/A | 0.55 | 0.48 | 2.73E-08 | 1.33 (1.24-1.44) | 0.48 | 0.50 | 1.34E-01 | 0.94 (0.86-1.02) | 3.86E-11 | 1.21 | 0.0005 |
| 15q24.1  | rs6495117   | 74899500 | G/A | 0.45 | 0.52 | 2.95E-08 | 0.75 (0.69-0.81) | 0.48 | 0.50 | 1.70E-01 | 0.94 (0.86-1.03) | 6.29E-11 | 0.83 | 0.0005 |
| 16p13.3  | rs2283487   | 3969886  | G/A | 0.42 | 0.47 | 3.18E-06 | 0.83 (0.76-0.89) | 0.43 | 0.47 | 3.91E-05 | 0.83 (0.76-0.91) | 1.27E-10 | 0.83 | 0.9121 |
| 16p13.3  | rs17136624  | 3996282  | A/G | 0.25 | 0.22 | 8.43E-05 | 1.21 (1.11-1.32) | 0.27 | 0.23 | 3.11E-06 | 1.28 (1.15-1.42) | 3.82E-10 | 1.24 | 0.5269 |
| 16p13.3  | rs4786640   | 5243669  | C/A | 0.52 | 0.48 | 9.15E-05 | 1.19 (1.10-1.28) | 0.48 | 0.49 | 2.78E-01 | 0.95 (0.87-1.04) | 6.89E-03 | 1.08 | 0.0005 |
| 16p13.11 | rs7198766   | 16105965 | G/A | 0.24 | 0.29 | 7.95E-05 | 0.78 (0.71-0.85) | 0.26 | 0.25 | 8.41E-02 | 1.09 (0.99-1.20) | 1.92E-03 | 0.90 | 0.0000 |
| 16p13.11 | rs7188937   | 16118620 | A/C | 0.24 | 0.29 | 6.91E-05 | 0.78 (0.72-0.85) | 0.26 | 0.25 | 2.01E-01 | 1.07 (0.97-1.18) | 6.08E-04 | 0.89 | 0.0000 |
| 16q22.2  | rs217181    | 72114002 | A/G | 0.32 | 0.29 | 2.05E-05 | 1.15 (1.06-1.25) | 0.32 | 0.31 | 5.06E-02 | 1.10 (1.00-1.20) | 1.34E-04 | 1.13 | 0.5508 |
| 17p13.1  | rs2872615   | 8914693  | G/A | 0.43 | 0.48 | 7.45E-06 | 0.80 (0.74-0.87) | 0.43 | 0.47 | 1.06E-04 | 0.84 (0.77-0.92) | 8.81E-12 | 0.82 | 0.5224 |
| 17p13.1  | rs1880646   | 8929845  | A/G | 0.52 | 0.46 | 4.98E-06 | 1.25 (1.16-1.35) | 0.52 | 0.48 | 2.60E-04 | 1.17 (1.08-1.28) | 1.69E-11 | 1.22 | 0.4104 |
| 17q21.32 | rs4968247   | 44988703 | A/G | 0.37 | 0.41 | 4.11E-06 | 0.84 (0.78-0.91) | 0.37 | 0.41 | 2.43E-05 | 0.83 (0.76-0.90) | 8.70E-10 | 0.83 | 0.8605 |
| 17q21.32 | rs1838105   | 45008935 | A/G | 0.45 | 0.39 | 1.84E-07 | 1.26 (1.17-1.36) | 0.42 | 0.38 | 3.48E-04 | 1.17 (1.08-1.28) | 1.31E-11 | 1.22 | 0.3543 |
| 17q22    | rs12951993  | 54760614 | A/G | 0.36 | 0.32 | 1.19E-05 | 1.21 (1.12-1.31) | 0.36 | 0.33 | 2.88E-02 | 1.11 (1.01-1.21) | 5.26E-07 | 1.16 | 0.2119 |
| 17q22    | rs227731    | 54773238 | C/A | 0.36 | 0.32 | 1.74E-05 | 1.22 (1.12-1.32) | 0.36 | 0.32 | 1.19E-03 | 1.16 (1.06-1.27) | 8.83E-09 | 1.19 | 0.5623 |
| 18q11.2  | rs3903236   | 22122490 | C/A | 0.29 | 0.33 | 2.87E-05 | 0.82 (0.76-0.89) | 0.32 | 0.32 | 9.35E-01 | 1.00 (0.91-1.09) | 3.64E-04 | 0.89 | 0.0077 |
| 18q11.2  | rs79280643  | 22126108 | A/G | 0.29 | 0.33 | 6.64E-05 | 0.82 (0.76-0.90) | 0.32 | 0.32 | 7.53E-01 | 0.99 (0.90-1.08) | 2.79E-04 | 0.89 | 0.0136 |
| 18q22.3  | rs117386717 | 69155820 | G/A | 0.02 | 0.03 | 7.86E-07 | 0.56 (0.43-0.72) | 0.03 | 0.04 | 5.89E-01 | 0.94 (0.74-1.19) | 8.42E-04 | 0.74 | 0.0111 |
| 19p13.11 | rs739461    | 19715794 | A/G | 0.21 | 0.25 | 4.52E-05 | 0.81 (0.74-0.89) | 0.22 | 0.23 | 3.37E-01 | 0.95 (0.86-1.05) | 4.24E-05 | 0.87 | 0.0456 |

|          |             |          |     |      |      |          |                  |      |      |          |                  |          |      |        |
|----------|-------------|----------|-----|------|------|----------|------------------|------|------|----------|------------------|----------|------|--------|
| 20q12    | rs6129653   | 39275603 | A/G | 0.35 | 0.31 | 2.99E-06 | 1.21 (1.12-1.31) | 0.35 | 0.30 | 5.78E-07 | 1.26 (1.15-1.39) | 8.57E-12 | 1.23 | 0.5970 |
| 20q13.2  | rs6126344   | 50407502 | A/C | 0.37 | 0.41 | 1.80E-05 | 0.87 (0.81-0.94) | 0.38 | 0.42 | 2.33E-05 | 0.83 (0.76-0.90) | 5.66E-08 | 0.85 | 0.4962 |
| 21q22.3  | rs2018054   | 45703660 | C/A | 0.11 | 0.14 | 4.51E-05 | 0.77 (0.68-0.86) | 0.13 | 0.13 | 8.53E-01 | 0.99 (0.87-1.12) | 5.05E-04 | 0.86 | 0.0126 |
| 21q22.3  | rs933150    | 45712588 | A/G | 0.18 | 0.21 | 3.77E-05 | 0.81 (0.73-0.89) | 0.19 | 0.20 | 3.26E-01 | 0.95 (0.85-1.06) | 1.06E-04 | 0.87 | 0.0684 |
| 22q11.21 | rs7287092   | 19561423 | A/G | 0.19 | 0.16 | 9.64E-05 | 1.25 (1.13-1.37) | 0.18 | 0.17 | 3.85E-01 | 1.05 (0.94-1.18) | 1.16E-04 | 1.16 | 0.0532 |
| 22q11.21 | rs2073764   | 19799410 | A/G | 0.01 | 0.04 | 2.61E-14 | 0.31 (0.23-0.42) | 0.04 | 0.05 | 3.76E-01 | 0.91 (0.73-1.12) | 2.20E-07 | 0.63 | 0.0000 |
| 22q12.1  | rs8135014   | 28046561 | A/G | 0.14 | 0.11 | 6.51E-05 | 1.26 (1.12-1.41) | 0.13 | 0.13 | 6.58E-01 | 1.03 (0.90-1.17) | 9.97E-04 | 1.15 | 0.0468 |
| 22q12.2  | rs36604     | 30340138 | C/A | 0.15 | 0.10 | 6.34E-07 | 1.61 (1.43-1.80) | 0.13 | 0.14 | 1.66E-01 | 0.91 (0.80-1.04) | 2.04E-07 | 1.25 | 0.0000 |
| 22q12.2  | rs5763674   | 30386358 | G/A | 0.15 | 0.10 | 4.39E-07 | 1.61 (1.44-1.81) | 0.13 | 0.14 | 1.76E-01 | 0.92 (0.81-1.04) | 1.22E-07 | 1.26 | 0.0000 |
| 22q12.2  | rs11089442  | 30689998 | A/G | 0.38 | 0.32 | 1.24E-07 | 1.33 (1.23-1.44) | 0.35 | 0.36 | 9.45E-02 | 0.93 (0.85-1.01) | 1.98E-05 | 1.14 | 0.0000 |
| 22q12.2  | rs2839998   | 30729507 | A/G | 0.38 | 0.32 | 1.28E-07 | 1.33 (1.23-1.44) | 0.35 | 0.36 | 8.09E-02 | 0.92 (0.84-1.01) | 2.42E-05 | 1.14 | 0.0000 |
| 22q12.2  | rs2072196   | 30975513 | A/G | 0.44 | 0.38 | 4.00E-06 | 1.30 (1.21-1.41) | 0.41 | 0.43 | 7.46E-02 | 0.92 (0.85-1.01) | 8.20E-05 | 1.12 | 0.0000 |
| 22q12.2  | rs117353193 | 31010417 | A/G | 0.05 | 0.03 | 1.13E-05 | 1.92 (1.59-2.32) | 0.04 | 0.05 | 1.34E-01 | 0.85 (0.68-1.05) | 4.34E-05 | 1.35 | 0.0000 |
| 22q12.2  | rs5753388   | 31310946 | G/A | 0.33 | 0.27 | 9.21E-06 | 1.35 (1.24-1.46) | 0.29 | 0.31 | 8.73E-02 | 0.92 (0.84-1.01) | 1.80E-05 | 1.14 | 0.0000 |
| 22q12.2  | rs1003480   | 31346752 | A/G | 0.33 | 0.26 | 8.65E-06 | 1.34 (1.24-1.46) | 0.29 | 0.31 | 8.46E-02 | 0.92 (0.84-1.01) | 2.66E-05 | 1.14 | 0.0000 |
| 22q12.2  | rs2073856   | 31663985 | A/G | 0.40 | 0.36 | 2.32E-06 | 1.19 (1.10-1.29) | 0.37 | 0.36 | 7.81E-01 | 1.01 (0.93-1.11) | 4.14E-04 | 1.11 | 0.0184 |
| 22q12.2  | rs17220418  | 31697842 | A/G | 0.40 | 0.36 | 6.08E-06 | 1.18 (1.09-1.28) | 0.37 | 0.36 | 6.82E-01 | 1.02 (0.93-1.11) | 5.16E-04 | 1.11 | 0.0322 |
| 22q12.2  | rs2006771   | 31998612 | A/G | 0.24 | 0.18 | 2.14E-05 | 1.36 (1.24-1.49) | 0.23 | 0.22 | 3.42E-01 | 1.05 (0.95-1.16) | 2.54E-08 | 1.21 | 0.0009 |
| 22q12.3  | rs78212183  | 32213984 | G/A | 0.11 | 0.07 | 1.29E-06 | 1.60 (1.40-1.83) | 0.10 | 0.09 | 3.29E-01 | 1.08 (0.93-1.25) | 4.80E-09 | 1.34 | 0.0005 |
| 22q12.3  | rs5756130   | 36684331 | A/G | 0.14 | 0.11 | 8.41E-05 | 1.34 (1.20-1.50) | 0.14 | 0.13 | 3.13E-01 | 1.07 (0.94-1.21) | 6.17E-06 | 1.21 | 0.0184 |

F\_A: minor allele frequency in cases; F\_U: minor allele frequency in controls; OR: odds ratio.

Alleles: shown as minor allele/major allele.

NSCLP Replication: replication study in 1,346 NSCLP cases and 4,542 controls of Chinese.

Meta analysis: Meta analysis of GWAS and NSCLP Replication.

The P value of GWAS and NSCLP Replication was calculated using logistic regression test

P(F) (The P value using Cochran-Mantel-Haenszel test) and OR(F) were calculated using fixed model.

\*P het: P value for heterozygosity using logistic regression test and Bonferroni correction. P het > 0.05 was considered to signify no heterogeneity.



**Supplementary Table 3. Association results of 14 novel loci and 3 suggestive loci in GWAS, NSCLP Replication and Meta analysis.**

| Loci     | SNP        | BP (hg19) | Alleles | GWAS |      |          |                  | NSCLP Replication |      |          |                  | Meta analysis |       |                    |
|----------|------------|-----------|---------|------|------|----------|------------------|-------------------|------|----------|------------------|---------------|-------|--------------------|
|          |            |           |         | F_A  | F_U  | P        | OR               | F_A               | F_U  | P        | OR               | P(F)          | OR(F) | P <sub>het</sub> * |
| 2p25.1   | rs287980   | 9971366   | G/A     | 0.23 | 0.27 | 1.99E-05 | 0.82 (0.75-0.89) | 0.23              | 0.27 | 5.54E-04 | 0.84 (0.76-0.93) | 1.94E-08      | 0.83  | 0.8120             |
| 2p25.1   | rs287982   | 9972442   | G/A     | 0.23 | 0.27 | 1.58E-05 | 0.82 (0.75-0.89) | 0.23              | 0.27 | 2.28E-04 | 0.83 (0.75-0.92) | 6.15E-09      | 0.82  | 0.8981             |
| 2q35     | rs6734545  | 220653996 | A/C     | 0.20 | 0.18 | 8.61E-05 | 1.16 (1.05-1.27) | 0.21              | 0.17 | 4.61E-05 | 1.25 (1.13-1.40) | 8.03E-07      | 1.20  | 0.3864             |
| 4p16.2   | rs34246903 | 4794195   | C/A     | 0.38 | 0.43 | 2.57E-05 | 0.82 (0.76-0.89) | 0.40              | 0.43 | 1.09E-02 | 0.89 (0.82-0.97) | 4.45E-08      | 0.85  | 0.2344             |
| 4p16.2   | rs1907989  | 4818925   | A/G     | 0.46 | 0.51 | 2.29E-06 | 0.81 (0.75-0.87) | 0.48              | 0.50 | 1.94E-02 | 0.90 (0.83-0.98) | 1.58E-08      | 0.85  | 0.1130             |
| 4q28.1   | rs908822   | 124906257 | A/G     | 0.10 | 0.07 | 6.13E-07 | 1.46 (1.28-1.66) | 0.10              | 0.09 | 4.46E-02 | 1.16 (1.00-1.34) | 4.33E-08      | 1.31  | 0.0545             |
| 5p12     | rs10462065 | 44068846  | A/C     | 0.24 | 0.20 | 3.51E-07 | 1.26 (1.15-1.38) | 0.23              | 0.20 | 2.04E-03 | 1.18 (1.06-1.31) | 1.12E-08      | 1.22  | 0.4835             |
| 5p12     | rs4242107  | 44129083  | A/G     | 0.44 | 0.40 | 6.08E-07 | 1.17 (1.09-1.26) | 0.43              | 0.40 | 7.44E-03 | 1.13 (1.03-1.23) | 1.32E-06      | 1.15  | 0.5979             |
| 6p24.3   | rs9381107  | 9469238   | A/G     | 0.31 | 0.37 | 1.97E-09 | 0.79 (0.73-0.86) | 0.33              | 0.36 | 1.40E-02 | 0.89 (0.81-0.98) | 2.72E-09      | 0.83  | 0.0900             |
| 8p11.23  | rs13317    | 38269514  | G/A     | 0.30 | 0.34 | 4.10E-06 | 0.83 (0.77-0.90) | 0.32              | 0.35 | 7.43E-03 | 0.88 (0.80-0.97) | 3.96E-08      | 0.85  | 0.4601             |
| 8q22.1   | rs12681366 | 95401265  | G/A     | 0.44 | 0.49 | 2.95E-06 | 0.82 (0.76-0.88) | 0.44              | 0.48 | 2.48E-04 | 0.85 (0.78-0.93) | 2.35E-10      | 0.83  | 0.5965             |
| 8q22.1   | rs957448   | 95541302  | G/A     | 0.44 | 0.50 | 3.78E-10 | 0.78 (0.72-0.84) | 0.46              | 0.49 | 7.59E-04 | 0.86 (0.79-0.94) | 9.60E-13      | 0.81  | 0.1260             |
| 8q22.2   | rs11774066 | 99455311  | A/G     | 0.42 | 0.38 | 8.65E-05 | 1.18 (1.09-1.28) | 0.42              | 0.39 | 3.85E-03 | 1.14 (1.04-1.24) | 3.39E-07      | 1.16  | 0.6166             |
| 8q22.2   | rs1487022  | 100529826 | A/C     | 0.44 | 0.39 | 5.64E-05 | 1.19 (1.10-1.28) | 0.44              | 0.41 | 1.43E-03 | 1.15 (1.06-1.26) | 7.84E-08      | 1.17  | 0.7214             |
| 9q22.32  | rs10512248 | 98259703  | C/A     | 0.29 | 0.34 | 1.80E-07 | 0.79 (0.73-0.86) | 0.30              | 0.33 | 3.19E-03 | 0.87 (0.79-0.95) | 5.10E-10      | 0.82  | 0.2026             |
| 9q22.32  | rs28361526 | 98295863  | A/G     | 0.30 | 0.34 | 1.65E-05 | 0.83 (0.77-0.90) | 0.31              | 0.34 | 3.02E-02 | 0.90 (0.82-0.99) | 1.95E-06      | 0.86  | 0.2949             |
| 12q13.13 | rs3741442  | 53346750  | G/A     | 0.46 | 0.41 | 1.17E-06 | 1.22 (1.13-1.32) | 0.46              | 0.41 | 3.36E-06 | 1.23 (1.13-1.34) | 3.72E-12      | 1.22  | 0.9598             |
| 12q13.2  | rs705704   | 56435412  | A/G     | 0.27 | 0.23 | 4.39E-05 | 1.22 (1.12-1.33) | 0.28              | 0.24 | 5.97E-05 | 1.22 (1.11-1.34) | 1.29E-09      | 1.22  | 0.9839             |
| 12q21.1  | rs2304269  | 72080272  | G/A     | 0.38 | 0.44 | 1.07E-07 | 0.79 (0.73-0.85) | 0.41              | 0.45 | 1.12E-04 | 0.84 (0.77-0.92) | 1.32E-12      | 0.81  | 0.3903             |
| 12q21.1  | rs7967428  | 72089040  | G/A     | 0.38 | 0.44 | 1.63E-07 | 0.79 (0.73-0.85) | 0.41              | 0.45 | 1.57E-04 | 0.84 (0.77-0.92) | 3.08E-12      | 0.81  | 0.3871             |
| 14q22.1  | rs7148069  | 51839645  | A/G     | 0.23 | 0.19 | 1.94E-05 | 1.27 (1.16-1.40) | 0.22              | 0.20 | 7.21E-03 | 1.16 (1.04-1.28) | 1.69E-08      | 1.22  | 0.2538             |
| 14q32.13 | rs1243572  | 95379499  | G/A     | 0.48 | 0.42 | 1.37E-07 | 1.26 (1.17-1.36) | 0.45              | 0.42 | 6.09E-03 | 1.13 (1.04-1.23) | 3.52E-10      | 1.20  | 0.1138             |

|          |           |          |     |      |      |          |                  |      |      |          |                  |          |      |        |
|----------|-----------|----------|-----|------|------|----------|------------------|------|------|----------|------------------|----------|------|--------|
| 14q32.13 | rs1243573 | 95379583 | C/A | 0.48 | 0.42 | 2.83E-07 | 1.25 (1.16-1.35) | 0.45 | 0.42 | 7.30E-03 | 1.13 (1.03-1.23) | 8.61E-10 | 1.20 | 0.1178 |
| 17q21.32 | rs4968247 | 44988703 | A/G | 0.37 | 0.41 | 4.11E-06 | 0.84 (0.78-0.91) | 0.37 | 0.41 | 2.43E-05 | 0.83 (0.76-0.90) | 8.70E-10 | 0.83 | 0.8605 |
| 17q21.32 | rs1838105 | 45008935 | A/G | 0.45 | 0.39 | 1.84E-07 | 1.26 (1.17-1.36) | 0.42 | 0.38 | 3.48E-04 | 1.17 (1.08-1.28) | 1.31E-11 | 1.22 | 0.3543 |
| 20q13.2  | rs6126344 | 50407502 | A/C | 0.37 | 0.41 | 1.80E-05 | 0.87 (0.81-0.94) | 0.38 | 0.42 | 2.33E-05 | 0.83 (0.76-0.90) | 5.66E-08 | 0.85 | 0.4962 |

F\_A: minor allele frequency in cases; F\_U: minor allele frequency in controls; OR: odds ratio.

Alleles: shown as minor allele/major allele.

P(F) and OR(F) were calculated using fixed model.

NSCLP Replication: replication study in 1,346 NSCLP cases and 4,542 controls of Chinese.

Meta analysis: Meta analysis of GWAS and NSCLP Replication.

The P value of GWAS and NSCLP Replication were calculated using logistic regression test

P(F) (The P value using Cochran-Mantel-Haenszel test ) and OR(F) were calculated using fixed model.

\*P het: P value for heterozygosity using logistic regression test Bonferroni correction. P het > 0.05 was considered to signify no heterogeneity.

**Supplementary Table 4. Association results for 22 previously reported NSCL/P loci in GWAS, NSCLP Replication and Meta analysis.**

| Loci    | SNP        | BP (hg19) | Gene           | Alleles | GWAS |      |          |                  | NSCLP Replication |      |          |                  | Meta analysis |       |                    |
|---------|------------|-----------|----------------|---------|------|------|----------|------------------|-------------------|------|----------|------------------|---------------|-------|--------------------|
|         |            |           |                |         | F_A  | F_U  | P        | OR               | F_A               | F_U  | P        | OR               | P(F)          | OR(F) | P <sub>het</sub> * |
| 1p36.13 | rs742071   | 18979874  | <i>PAX7</i>    | A/C     | 0.06 | 0.04 | 4.73E-05 | 1.47 (1.24-1.74) | 0.05              | 0.04 | 9.17E-03 | 1.30 (1.07-1.59) | 4.26E-07      | 1.40  | 0.4859             |
| 1p22.1  | rs4147827  | 94548080  | <i>ABCA4</i>   | C/G     | 0.08 | 0.05 | 4.86E-05 | 1.41 (1.21-1.64) | 0.08              | 0.06 | 3.98E-03 | 1.28 (1.08-1.51) | 1.89E-07      | 1.35  | 0.5255             |
| 1p22.1  | rs17461953 | 94551450  | <i>ABCA4</i>   | C/A     | 0.08 | 0.05 | 2.68E-05 | 1.42 (1.22-1.65) | 0.08              | 0.06 | 3.01E-03 | 1.29 (1.09-1.52) | 7.04E-08      | 1.36  | 0.5006             |
| 1p22.1  | rs481931   | 94570016  | <i>ABCA4</i>   | A/C     | 0.33 | 0.37 | 4.82E-06 | 0.83 (0.77-0.90) | 0.33              | 0.39 | 2.79E-08 | 0.77 (0.71-0.85) | 1.06E-12      | 0.80  | 0.3687             |
| 1p22.1  | rs4147803  | 94582293  | <i>ABCA4</i>   | G/C     | 0.29 | 0.33 | 1.22E-06 | 0.81 (0.75-0.88) | 0.29              | 0.34 | 2.27E-06 | 0.80 (0.73-0.88) | 7.97E-12      | 0.81  | 0.8369             |
| 1q32.2  | rs861020   | 209977111 | <i>IRF6</i>    | A/G     | 0.24 | 0.19 | 6.38E-12 | 1.34 (1.23-1.47) | 0.23              | 0.19 | 6.63E-06 | 1.27 (1.15-1.41) | 1.30E-14      | 1.31  | 0.5428             |
| 1q32.2  | rs642961   | 209989270 | <i>IRF6</i>    | A/G     | 0.24 | 0.19 | 3.86E-12 | 1.35 (1.23-1.48) | 0.23              | 0.19 | 2.23E-06 | 1.29 (1.16-1.43) | 2.76E-15      | 1.32  | 0.6061             |
| 1q32.2  | rs2064163  | 210048819 | <i>IRF6</i>    | A/C     | 0.38 | 0.44 | 1.04E-09 | 0.77 (0.71-0.83) | 0.38              | 0.44 | 8.18E-09 | 0.77 (0.71-0.84) | 8.60E-19      | 0.77  | 0.9625             |
| 1q32.2  | rs9430019  | 210050794 | <i>IRF6</i>    | A/G     | 0.31 | 0.26 | 1.77E-07 | 1.27 (1.17-1.38) | 0.30              | 0.26 | 2.58E-05 | 1.23 (1.12-1.35) | 1.68E-12      | 1.25  | 0.6420             |
| 2p24.2  | rs10172734 | 16733054  | <i>FAM49A</i>  | G/A     | 0.26 | 0.32 | 3.85E-13 | 0.76 (0.70-0.83) | 0.26              | 0.33 | 1.58E-11 | 0.72 (0.65-0.79) | 2.89E-20      | 0.74  | 0.4992             |
| 2p24.2  | rs7552     | 16733928  | <i>FAM49A</i>  | A/G     | 0.24 | 0.30 | 1.57E-14 | 0.74 (0.68-0.81) | 0.24              | 0.31 | 5.64E-12 | 0.71 (0.64-0.78) | 5.83E-22      | 0.73  | 0.5814             |
| 2p21    | rs7590268  | 43540125  | <i>THADA</i>   | C/A     | 0.07 | 0.05 | 3.02E-04 | 1.33 (1.14-1.56) | NA                | NA   | NA       | NA               | NA            | NA    | NA                 |
| 2p21    | rs6544647  | 43578419  | <i>THADA</i>   | A/G     | 0.08 | 0.06 | 2.33E-05 | 1.37 (1.18-1.58) | NA                | NA   | NA       | NA               | NA            | NA    | NA                 |
| 3p11.1  | rs10511145 | 89597679  | <i>EPHA3</i>   | A/C     | 0.17 | 0.20 | 1.53E-04 | 0.83 (0.75-0.91) | NA                | NA   | NA       | NA               | NA            | NA    | NA                 |
| 3q12.1  | rs1038294  | 99503728  | <i>COL8A1</i>  | A/G     | 0.13 | 0.17 | 1.18E-07 | 0.73 (0.66-0.81) | 0.15              | 0.16 | 2.12E-01 | 0.93 (0.82-1.05) | 4.47E-07      | 0.81  | 0.0127             |
| 3q12.1  | rs1688766  | 99647850  | <i>COL8A1</i>  | A/G     | 0.13 | 0.17 | 1.32E-07 | 0.73 (0.65-0.81) | 0.15              | 0.16 | 2.28E-01 | 0.93 (0.82-1.05) | 4.83E-07      | 0.81  | 0.0113             |
| 8q21.3  | rs12543318 | 88868340  | <i>DCAF4L2</i> | A/C     | 0.32 | 0.38 | 2.43E-07 | 0.78 (0.72-0.84) | 0.33              | 0.37 | 7.83E-04 | 0.86 (0.78-0.94) | 8.80E-12      | 0.81  | 0.2050             |
| 8q21.3  | rs1034832  | 88918331  | <i>DCAF4L2</i> | C/A     | 0.31 | 0.36 | 5.92E-07 | 0.79 (0.73-0.85) | 0.32              | 0.35 | 1.65E-03 | 0.86 (0.79-0.95) | 1.35E-10      | 0.82  | 0.2243             |
| 8q24.21 | rs7845615  | 129888794 | <i>MYC</i>     | A/G     | 0.22 | 0.18 | 5.11E-06 | 1.28 (1.17-1.41) | 0.20              | 0.17 | 8.59E-05 | 1.25 (1.12-1.39) | 1.03E-10      | 1.27  | 0.8110             |
| 8q24.21 | rs7017252  | 129950844 | <i>MYC</i>     | A/G     | 0.08 | 0.05 | 3.27E-06 | 1.59 (1.36-1.85) | 0.07              | 0.05 | 4.18E-08 | 1.62 (1.36-1.93) | 8.47E-16      | 1.60  | 0.8960             |
| 9q22.2  | rs7871395  | 92209587  | <i>GADD45G</i> | A/G     | 0.30 | 0.26 | 4.54E-05 | 1.23 (1.13-1.34) | 0.29              | 0.26 | 1.07E-03 | 1.17 (1.07-1.29) | 6.06E-09      | 1.21  | 0.5782             |
| 9q22.33 | rs7043516  | 100617433 | <i>FOXE1</i>   | C/A     | 0.04 | 0.06 | 1.68E-04 | 0.70 (0.59-0.85) | NA                | NA   | NA       | NA               | NA            | NA    | NA                 |

|          |            |           |                       |     |      |      |          |                  |      |      |          |                  |          |      |        |
|----------|------------|-----------|-----------------------|-----|------|------|----------|------------------|------|------|----------|------------------|----------|------|--------|
| 10q25.3  | rs6585429  | 118893231 | <i>VAX1</i>           | G/A | 0.39 | 0.44 | 4.92E-08 | 0.81 (0.75-0.87) | 0.39 | 0.45 | 2.22E-06 | 0.81 (0.74-0.88) | 7.14E-13 | 0.81 | 0.9967 |
| 13q31.1  | rs9545308  | 80639405  | <i>SPRY2</i>          | A/C | 0.15 | 0.12 | 4.09E-05 | 1.30 (1.17-1.45) | 0.14 | 0.11 | 2.34E-04 | 1.27 (1.12-1.44) | 2.00E-09 | 1.29 | 0.8103 |
| 15q13.3  | rs1258763  | 33050423  | <i>GREM1</i>          | A/G | 0.08 | 0.07 | 2.21E-02 | 1.18 (1.02-1.37) | NA   | NA   | NA       | NA               | NA       | NA   | NA     |
| 15q22.2  | rs78512626 | 61432877  | <i>TPM1</i>           | C/A | 0.12 | 0.15 | 8.05E-06 | 0.76 (0.67-0.85) | 0.14 | 0.15 | 3.84E-01 | 0.95 (0.84-1.07) | 7.02E-05 | 0.84 | 0.0261 |
| 16p13.3  | rs2283487  | 3969886   | <i>CREBBP / ADCY9</i> | G/A | 0.42 | 0.47 | 3.18E-06 | 0.83 (0.76-0.89) | 0.43 | 0.47 | 3.91E-05 | 0.83 (0.76-0.91) | 1.27E-10 | 0.83 | 0.9121 |
| 16p13.3  | rs17136624 | 3996282   | <i>CREBBP / ADCY9</i> | A/G | 0.25 | 0.22 | 8.43E-05 | 1.21 (1.11-1.32) | 0.27 | 0.23 | 3.11E-06 | 1.28 (1.15-1.42) | 3.82E-10 | 1.24 | 0.5269 |
| 17p13.1  | rs2872615  | 8914693   | <i>NTNI</i>           | G/A | 0.43 | 0.48 | 7.45E-06 | 0.80 (0.74-0.87) | 0.43 | 0.47 | 1.06E-04 | 0.84 (0.77-0.92) | 8.81E-12 | 0.82 | 0.5224 |
| 17p13.1  | rs1880646  | 8929845   | <i>NTNI</i>           | A/G | 0.52 | 0.46 | 4.98E-06 | 1.25 (1.16-1.35) | 0.52 | 0.48 | 2.60E-04 | 1.17 (1.08-1.28) | 1.69E-11 | 1.22 | 0.4104 |
| 17q22    | rs12951993 | 54760614  | <i>NOG</i>            | A/G | 0.36 | 0.32 | 1.19E-05 | 1.21 (1.12-1.31) | 0.36 | 0.33 | 2.88E-02 | 1.11 (1.01-1.21) | 5.26E-07 | 1.16 | 0.2119 |
| 17q22    | rs227731   | 54773238  | <i>NOG</i>            | C/A | 0.36 | 0.32 | 1.74E-05 | 1.22 (1.12-1.32) | 0.36 | 0.32 | 1.19E-03 | 1.16 (1.06-1.27) | 8.83E-09 | 1.19 | 0.5623 |
| 17q23.2  | rs16946713 | 61087073  | <i>TANC2 / DCAF7</i>  | G/A | 0.07 | 0.06 | 5.94E-02 | 1.16 (0.99-1.35) | NA   | NA   | NA       | NA               | NA       | NA   | NA     |
| 17q25.3  | rs2273280  | 76103663  | <i>RBFOX3</i>         | A/G | 0.15 | 0.18 | 5.05E-05 | 0.79 (0.71-0.88) | NA   | NA   | NA       | NA               | NA       | NA   | NA     |
| 17q25.3  | rs76579845 | 76598716  | <i>RBFOX3</i>         | A/C | 0.02 | 0.04 | 2.08E-07 | 0.51 (0.40-0.65) | NA   | NA   | NA       | NA               | NA       | NA   | NA     |
| 19q13.11 | rs10404307 | 33512011  | <i>RHPN2</i>          | C/A | 0.15 | 0.18 | 8.99E-06 | 0.79 (0.71-0.88) | NA   | NA   | NA       | NA               | NA       | NA   | NA     |
| 20q12    | rs6129653  | 39275603  | <i>MAFB</i>           | A/G | 0.35 | 0.31 | 2.99E-06 | 1.21 (1.12-1.31) | 0.35 | 0.30 | 5.78E-07 | 1.26 (1.15-1.39) | 8.57E-12 | 1.23 | 0.5970 |

F\_A: minor allele frequency in cases; F\_U: minor allele frequency in controls; OR: odds ratio.

Alleles: shown as minor allele/major allele.

NSCLP Replication: replication study in 1,346 NSCLP cases and 4,542 controls of Chinese.

Meta analysis: Meta analysis of GWAS and NSCLP Replication.

The P value of GWAS and NSCLP Replication using using logistic regression test

P(F) (The P value using Cochran-Mantel-Haenszel test) and OR(F) were calculated using fixed model.

\*P het: P value for heterozygosity using logistic regression test Bonferroni correction. P het > 0.05 was considered to signify no heterogeneity.

**Supplementary Table 5. Independent Secondary signals observed in the discovery and NSCLP Replication samples when performing conditional on one previously reported loci.**

| Loci   | Gene               | SNP       | Alleles | Combined Discovery and Replication 1 |          |          |      |             | Logistic condition |          |      | LD   |                |
|--------|--------------------|-----------|---------|--------------------------------------|----------|----------|------|-------------|--------------------|----------|------|------|----------------|
|        |                    |           |         | MAF                                  |          | P        | OR   | 95% CI      | Condition          | P        | OR   | D'   | r <sup>2</sup> |
|        |                    |           |         | Cases                                | Controls |          |      |             |                    |          |      |      |                |
| 1q32.2 | <i>IRF6</i>        | rs861020  | A/G     | 0.23                                 | 0.19     | 1.30E-14 | 1.31 | (1.23-1.41) | rs642961           | NA       | NA   | 0.99 | 0.98           |
|        |                    |           |         |                                      |          |          |      |             | rs2064163          | 1.64E-06 | 1.20 | 0.82 | 0.12           |
|        |                    |           |         |                                      |          |          |      |             | rs9430019          | 8.79E-17 | 1.34 | 0.24 | 0.01           |
|        | <i>IRF6/DIEXF</i>  | rs642961  | A/G     | 0.23                                 | 0.19     | 2.76E-15 | 1.32 | (1.23-1.41) | rs861020           | NA       | NA   | 0.99 | 0.98           |
|        |                    |           |         |                                      |          |          |      |             | rs2064163          | 9.80E-07 | 1.20 | 0.82 | 0.12           |
|        |                    |           |         |                                      |          |          |      |             | rs9430019          | 1.81E-17 | 1.35 | 0.25 | 0.01           |
|        | <i>DIEXF/SYT14</i> | rs2064163 | A/C     | 0.38                                 | 0.44     | 8.60E-19 | 0.77 | (0.73-0.82) | rs861020           | 6.43E-11 | 0.81 | 0.82 | 0.12           |
|        |                    |           |         |                                      |          |          |      |             | rs642961           | 1.05E-10 | 0.82 | 0.82 | 0.12           |
|        |                    |           |         |                                      |          |          |      |             | rs9430019          | 1.43E-09 | 0.81 | 1.00 | 0.28           |
|        | <i>DIEXF/SYT14</i> | rs9430019 | A/G     | 0.31                                 | 0.26     | 1.68E-12 | 1.25 | (1.18-1.34) | rs861020           | 5.64E-15 | 1.28 | 0.24 | 0.01           |
|        |                    |           |         |                                      |          |          |      |             | rs642961           | 1.06E-14 | 1.28 | 0.25 | 0.01           |
|        |                    |           |         |                                      |          |          |      |             | rs2064163          | 4.51E-03 | 1.11 | 1.00 | 0.28           |

MAF: minor allele frequency; OR: odds ratio; 95%CI: 95% confidence interval; LD: linkage disequilibrium; D': D prime; r<sup>2</sup>: r square.

Alleles: shown as minor allele/major allele.

P value using stepwise subset-based conditional logistic regression

**Supplementary Table 6. Association results for 40 SNPs in NSCLO Replication.**

| Loci     | SNP        | BP (hg19) | Alleles | NSCLO Replication |      |                 |                  | New/Reported |
|----------|------------|-----------|---------|-------------------|------|-----------------|------------------|--------------|
|          |            |           |         | F_A               | F_U  | P               | OR               |              |
| 2p25.1   | rs287980   | 9971366   | G/A     | 0.25              | 0.26 | 2.34E-01        | 0.93 (0.84-1.05) | New          |
| 2p25.1   | rs287982   | 9972442   | G/A     | 0.25              | 0.26 | 1.65E-01        | 0.92 (0.83-1.03) | New          |
| 4p16.2   | rs34246903 | 4794195   | C/A     | 0.40              | 0.42 | 2.91E-01        | 0.95 (0.86-1.05) | New          |
| 4p16.2   | rs1907989  | 4818925   | A/G     | 0.48              | 0.50 | 6.42E-02        | 0.91 (0.83-1.01) | New          |
| 4q28.1   | rs908822   | 124906257 | A/G     | 0.09              | 0.08 | 7.64E-02        | 1.17 (0.98-1.38) | New          |
| 5p12     | rs10462065 | 44068846  | A/C     | 0.24              | 0.22 | 7.92E-02        | 1.11 (0.99-1.24) | New          |
| 6p24.3   | rs9381107  | 9469238   | A/G     | 0.32              | 0.35 | 4.79E-02        | 0.90 (0.81-1.00) | New          |
| 8p11.23  | rs13317    | 38269514  | G/A     | 0.31              | 0.33 | 7.59E-02        | 0.91 (0.82-1.01) | New          |
| 8q22.1   | rs12681366 | 95401265  | G/A     | 0.46              | 0.48 | 6.16E-02        | 0.91 (0.83-1.01) | New          |
| 8q22.1   | rs957448   | 95541302  | G/A     | 0.47              | 0.49 | 5.72E-02        | 0.91 (0.83-1.00) | New          |
| 9q22.32  | rs10512248 | 98259703  | C/A     | 0.33              | 0.35 | 4.47E-02        | 0.90 (0.81-1.00) | New          |
| 12q13.13 | rs3741442  | 53346750  | G/A     | 0.44              | 0.42 | 6.42E-02        | 1.10 (0.99-1.21) | New          |
| 12q13.2  | rs705704   | 56435412  | A/G     | 0.24              | 0.25 | 2.84E-01        | 0.94 (0.84-1.05) | New          |
| 12q21.1  | rs2304269  | 72080272  | G/A     | 0.41              | 0.44 | 2.04E-02        | 0.89 (0.81-0.98) | New          |
| 12q21.1  | rs7967428  | 72089040  | G/A     | 0.41              | 0.44 | 6.56E-02        | 0.91 (0.83-1.01) | New          |
| 14q22.1  | rs7148069  | 51839645  | A/G     | 0.21              | 0.20 | 6.21E-01        | 1.03 (0.91-1.16) | New          |
| 14q32.13 | rs1243572  | 95379499  | G/A     | 0.47              | 0.43 | <b>7.75E-04</b> | 1.18 (1.07-1.30) | New          |
| 14q32.13 | rs1243573  | 95379583  | C/A     | 0.46              | 0.43 | 8.19E-03        | 1.14 (1.03-1.26) | New          |
| 17q21.32 | rs4968247  | 44988703  | A/G     | 0.37              | 0.40 | 1.44E-03        | 0.85 (0.77-0.94) | New          |
| 17q21.32 | rs1838105  | 45008935  | A/G     | 0.43              | 0.38 | <b>5.98E-04</b> | 1.19 (1.08-1.31) | New          |
| 1p22.1   | rs4147803  | 94582293  | G/C     | 0.30              | 0.34 | <b>9.89E-04</b> | 0.84 (0.75-0.93) | Reported     |
| 1q32.2   | rs861020   | 209977111 | A/G     | 0.30              | 0.18 | <b>1.02E-28</b> | 1.86 (1.67-2.08) | Reported     |

|         |            |           |     |      |      |                 |                  |          |
|---------|------------|-----------|-----|------|------|-----------------|------------------|----------|
| 1q32.2  | rs642961   | 209989270 | A/G | 0.30 | 0.18 | <b>1.69E-30</b> | 1.90 (1.70-2.13) | Reported |
| 1q32.2  | rs2064163  | 210048819 | A/C | 0.39 | 0.45 | <b>1.06E-06</b> | 0.78 (0.71-0.86) | Reported |
| 1q32.2  | rs9430019  | 210050794 | A/G | 0.30 | 0.26 | <b>2.28E-04</b> | 1.22 (1.10-1.36) | Reported |
| 2p24.2  | rs10172734 | 16733054  | G/A | 0.25 | 0.34 | <b>1.69E-14</b> | 0.65 (0.58-0.73) | Reported |
| 2p24.2  | rs7552     | 16733928  | A/G | 0.26 | 0.32 | <b>1.62E-07</b> | 0.75 (0.67-0.83) | Reported |
| 8q21.3  | rs12543318 | 88868340  | A/C | 0.31 | 0.37 | <b>1.84E-07</b> | 0.76 (0.68-0.84) | Reported |
| 8q21.3  | rs1034832  | 88918331  | C/A | 0.28 | 0.34 | <b>1.05E-07</b> | 0.75 (0.67-0.83) | Reported |
| 8q24.21 | rs7845615  | 129888794 | A/G | 0.21 | 0.18 | 8.40E-03        | 1.18 (1.04-1.33) | Reported |
| 8q24.21 | rs7017252  | 129950844 | A/G | 0.07 | 0.05 | 2.88E-03        | 1.36 (1.11-1.66) | Reported |
| 9q22.2  | rs7871395  | 92209587  | A/G | 0.31 | 0.27 | <b>1.22E-04</b> | 1.23 (1.11-1.37) | Reported |
| 10q25.3 | rs6585429  | 118893231 | G/A | 0.38 | 0.44 | <b>8.42E-07</b> | 0.78 (0.71-0.86) | Reported |
| 13q31.1 | rs9545308  | 80639405  | A/C | 0.14 | 0.12 | 4.95E-03        | 1.23 (1.06-1.42) | Reported |
| 16p13.3 | rs2283487  | 3969886   | G/A | 0.45 | 0.47 | 1.47E-01        | 0.93 (0.84-1.03) | Reported |
| 16p13.3 | rs17136624 | 3996282   | A/G | 0.24 | 0.22 | 1.54E-01        | 1.09 (0.97-1.22) | Reported |
| 17p13.1 | rs2872615  | 8914693   | G/A | 0.43 | 0.47 | <b>8.21E-04</b> | 0.85 (0.77-0.93) | Reported |
| 17p13.1 | rs1880646  | 8929845   | A/G | 0.51 | 0.49 | 6.30E-02        | 1.10 (1.00-1.21) | Reported |
| 17q22   | rs227731   | 54773238  | C/A | 0.36 | 0.34 | 2.98E-02        | 1.12 (1.01-1.24) | Reported |
| 20q12   | rs6129653  | 39275603  | A/G | 0.34 | 0.28 | <b>2.34E-06</b> | 1.28 (1.16-1.42) | Reported |

F\_A: minor allele frequency in cases; F\_U: minor allele frequency in controls; OR: odds ratio.

Alleles: shown as minor allele/major allele.

NSCLO Replication: replication study in 1,104 NSCLO cases and 3,312 controls of Chinese.

P value using logistic regression test

**Supplementary Table 7. Association results of 40 SNPs in NSCPO Replication.**

| Loci     | SNP        | BP (hg19) | Alleles | NSCPO Replication |      |                 |                  | New/Reported |
|----------|------------|-----------|---------|-------------------|------|-----------------|------------------|--------------|
|          |            |           |         | F_A               | F_U  | P               | OR               |              |
| 2p25.1   | rs287980   | 9971366   | G/A     | 0.27              | 0.26 | 7.87E-01        | 1.02 (0.91-1.13) | New          |
| 2p25.1   | rs287982   | 9972442   | C/T     | 0.27              | 0.26 | 7.63E-01        | 1.02 (0.91-1.14) | New          |
| 4p16.2   | rs34246903 | 4794195   | C/A     | 0.41              | 0.42 | 7.77E-01        | 0.99 (0.89-1.09) | New          |
| 4p16.2   | rs1907989  | 4818925   | G/A     | 0.50              | 0.50 | 5.78E-01        | 1.03 (0.93-1.13) | New          |
| 4q28.1   | rs908822   | 124906257 | T/C     | 0.09              | 0.08 | 5.21E-01        | 1.06 (0.89-1.26) | New          |
| 5p12     | rs10462065 | 44068846  | A/C     | 0.22              | 0.22 | 7.17E-01        | 0.98 (0.87-1.10) | New          |
| 6p24.3   | rs9381107  | 9469238   | A/G     | 0.34              | 0.35 | 2.81E-01        | 0.95 (0.85-1.05) | New          |
| 8p11.23  | rs13317    | 38269514  | C/T     | 0.32              | 0.33 | 3.83E-01        | 0.95 (0.86-1.06) | New          |
| 8q22.1   | rs12681366 | 95401265  | C/T     | 0.47              | 0.48 | 4.01E-01        | 0.96 (0.87-1.06) | New          |
| 8q22.1   | rs957448   | 95541302  | G/A     | 0.48              | 0.49 | 1.33E-01        | 0.93 (0.84-1.02) | New          |
| 9q22.32  | rs10512248 | 98259703  | G/T     | 0.31              | 0.35 | <b>1.23E-04</b> | 0.82 (0.73-0.91) | New          |
| 12q13.13 | rs3741442  | 53346750  | C/T     | 0.44              | 0.42 | 9.72E-02        | 1.09 (0.99-1.20) | New          |
| 12q13.2  | rs705704   | 56435412  | A/G     | 0.25              | 0.25 | 1.00E+00        | 1.00 (0.89-1.12) | New          |
| 12q21.1  | rs2304269  | 72080272  | C/T     | 0.45              | 0.44 | 3.03E-01        | 1.05 (0.95-1.16) | New          |
| 12q21.1  | rs7967428  | 72089040  | G/A     | 0.45              | 0.44 | 1.72E-01        | 1.07 (0.97-1.18) | New          |
| 14q22.1  | rs7148069  | 51839645  | T/C     | 0.19              | 0.20 | 4.90E-01        | 0.96 (0.85-1.08) | New          |
| 14q32.13 | rs1243572  | 95379499  | C/T     | 0.44              | 0.43 | 2.14E-01        | 1.06 (0.96-1.17) | New          |
| 14q32.13 | rs1243573  | 95379583  | C/A     | 0.45              | 0.43 | 8.60E-02        | 1.09 (0.99-1.20) | New          |
| 17q21.32 | rs4968247  | 44988703  | T/C     | 0.40              | 0.40 | 4.34E-01        | 0.96 (0.87-1.06) | New          |
| 17q21.32 | rs1838105  | 45008935  | A/G     | 0.38              | 0.38 | 9.30E-01        | 1.00 (0.90-1.10) | New          |
| 1p22.1   | rs4147803  | 94582293  | C/G     | 0.32              | 0.34 | 2.72E-01        | 0.94 (0.85-1.05) | Reported     |
| 1q32.2   | rs861020   | 209977111 | A/G     | 0.17              | 0.18 | 6.63E-02        | 0.89 (0.78-1.01) | Reported     |



|         |            |           |     |      |      |                 |                  |          |
|---------|------------|-----------|-----|------|------|-----------------|------------------|----------|
| 1q32.2  | rs642961   | 209989270 | A/G | 0.17 | 0.18 | 1.16E-01        | 0.90 (0.79-1.03) | Reported |
| 1q32.2  | rs2064163  | 210048819 | T/G | 0.44 | 0.45 | 8.25E-01        | 0.99 (0.90-1.09) | Reported |
| 1q32.2  | rs9430019  | 210050794 | T/C | 0.19 | 0.26 | <b>1.58E-11</b> | 0.66 (0.59-0.75) | Reported |
| 2p24.2  | rs10172734 | 16733054  | G/A | 0.33 | 0.34 | 4.36E-01        | 0.96 (0.87-1.06) | Reported |
| 2p24.2  | rs7552     | 16733928  | A/G | 0.28 | 0.32 | 1.81E-03        | 0.84 (0.76-0.94) | Reported |
| 8q21.3  | rs12543318 | 88868340  | A/C | 0.35 | 0.37 | 1.18E-01        | 0.92 (0.83-1.02) | Reported |
| 8q21.3  | rs1034832  | 88918331  | G/T | 0.35 | 0.34 | 5.45E-01        | 1.03 (0.93-1.14) | Reported |
| 8q24.21 | rs7845615  | 129888794 | T/C | 0.19 | 0.18 | 3.06E-01        | 1.07 (0.94-1.21) | Reported |
| 8q24.21 | rs7017252  | 129950844 | T/C | 0.07 | 0.05 | <b>4.49E-04</b> | 1.43 (1.17-1.74) | Reported |
| 9q22.2  | rs7871395  | 92209587  | T/C | 0.27 | 0.27 | 6.28E-01        | 1.03 (0.92-1.15) | Reported |
| 10q25.3 | rs6585429  | 118893231 | G/A | 0.43 | 0.44 | 2.96E-01        | 0.95 (0.86-1.05) | Reported |
| 13q31.1 | rs9545308  | 80639405  | T/G | 0.14 | 0.12 | 7.49E-03        | 1.22 (1.05-1.40) | Reported |
| 16p13.3 | rs2283487  | 3969886   | G/A | 0.47 | 0.47 | 9.49E-01        | 1.00 (0.90-1.10) | Reported |
| 16p13.3 | rs17136624 | 3996282   | A/G | 0.22 | 0.22 | 6.91E-01        | 1.02 (0.91-1.15) | Reported |
| 17p13.1 | rs2872615  | 8914693   | C/T | 0.49 | 0.47 | 5.82E-02        | 1.10 (1.00-1.21) | Reported |
| 17p13.1 | rs1880646  | 8929845   | A/G | 0.47 | 0.49 | 2.52E-01        | 0.94 (0.86-1.04) | Reported |
| 17q22   | rs227731   | 54773238  | G/T | 0.33 | 0.34 | 4.40E-01        | 0.96 (0.87-1.06) | Reported |
| 20q12   | rs6129653  | 39275603  | T/C | 0.31 | 0.28 | 8.99E-03        | 1.15 (1.04-1.28) | Reported |

F\_A: minor allele frequency in cases; F\_U: minor allele frequency in controls; OR: odds ratio.

Alleles: shown as minor allele/major allele.

NSCPO Replication: replication study in 1,104 NSCPO cases and 3,312 controls of Chinese.

The P value using logistic regression test;

**Supplementary Table 8. Genotype-phenotype analysis.**

|                      | <b>Loci</b> | <b>SNP</b> | <b>BP (hg19)</b> | <b>Allele</b> | <b>F_A</b> | <b>F_U</b> | <b>F-Healthy*</b> | <b>P</b>        | <b>OR<sup>#</sup></b> | <b>Gene</b>  |
|----------------------|-------------|------------|------------------|---------------|------------|------------|-------------------|-----------------|-----------------------|--------------|
| Gender (NSCLP)       | 1q32.2      | rs861020   | 209977111        | A/G           | 0.25       | 0.20       | 0.19              | <b>2.94E-04</b> | 1.27 (1.12-1.45)      | <i>IRF6</i>  |
|                      |             | rs642961   | 209989270        | A/G           | 0.25       | 0.20       | 0.19              | <b>3.47E-04</b> | 1.27 (1.11-1.44)      | <i>IRF6</i>  |
|                      |             | rs2064163  | 210048819        | A/C           | 0.36       | 0.41       | 0.44              | <b>1.38E-04</b> | 1.23 (1.11-1.37)      | <i>IRF6</i>  |
|                      |             | rs9430019  | 210050794        | A/G           | 0.32       | 0.28       | 0.26              | 1.26E-03        | 1.21 (1.08-1.36)      | <i>IRF6</i>  |
| Mother's Age (NSCLP) | 8q21.3      | rs12543318 | 88868340         | A/C           | 0.27       | 0.34       | 0.38              | <b>3.29E-04</b> | 1.43 (1.18-1.72)      | <i>MMP16</i> |
|                      |             | rs1034832  | 88918331         | C/A           | 0.26       | 0.32       | 0.36              | 2.98E-03        | 1.35 (1.11-1.64)      | <i>MMP16</i> |

NSCLP: non-syndromic cleft lip with palate; OR: odds ratio.

F\_A: minor allele frequency of male or older mothers (> 35y) in NSCLP, respectively.

F\_U: minor allele frequency of female or standard age mothers in the reference group (25 - 35y) in NSCLP, respectively.

Alleles: shown as minor allele/major allele, and risk allele was in bold.

<sup>#</sup>OR was calculated based on risk allele.

\*Minor allele frequency in controls from discovery GWAS stage.

The P value using logistic regression test;

**Supplementary Table 9. Association results for 24 SNPs in foreign replication data sets.**

| Loci     | SNP        | BP        | Central European replication |      |      |      |                 | Asian case-parent trios for replication |           |      |           |      |       |                 | European ancestry case-parent trios for replication |      |           |      |           |      |       | New /Reported   |      |         |
|----------|------------|-----------|------------------------------|------|------|------|-----------------|-----------------------------------------|-----------|------|-----------|------|-------|-----------------|-----------------------------------------------------|------|-----------|------|-----------|------|-------|-----------------|------|---------|
|          |            |           | Alleles                      | F_A  | F_U  | OR   | P               | MAF                                     | Beta coef | SE   | Test stat | RR   | Trios | P               | Missing                                             | MAF  | Beta coef | SE   | Test stat | RR   | Trios |                 | P    | Missing |
| 2p25.1   | rs287980   | 9971366   | G/A                          | 0.20 | 0.21 | 0.94 | 5.34E-01        | 0.26                                    | -0.06     | 0.08 | 0.54      | 0.94 | 544   | 4.63E-01        | 0.00                                                | 0.21 | -0.03     | 0.10 | 0.09      | 0.97 | 324   | 7.62E-01        | 0.00 | New     |
| 2p25.1   | rs287982   | 9972442   | C/T                          | 0.20 | 0.21 | 0.94 | 5.21E-01        | 0.26                                    | -0.06     | 0.08 | 0.54      | 0.94 | 544   | 4.63E-01        | 0.00                                                | 0.21 | -0.04     | 0.10 | 0.16      | 0.96 | 321   | 6.85E-01        | 0.00 | New     |
| 4p16.2   | rs34246903 | 4794195   | A/C                          | 0.70 | 0.66 | 1.22 | <b>2.39E-02</b> | 0.42                                    | -0.16     | 0.07 | 4.99      | 0.85 | 604   | <b>2.54E-02</b> | 0.02                                                | 0.33 | 0.12      | 0.09 | 1.92      | 1.13 | 397   | 1.65E-01        | 0.01 | New     |
| 4p16.2   | rs1907989  | 4818925   | A/G                          | 0.57 | 0.61 | 0.83 | <b>1.92E-02</b> | 0.49                                    | 0.20      | 0.07 | 8.33      | 1.22 | 646   | <b>3.91E-03</b> | 0.00                                                | 0.36 | 0.06      | 0.09 | 0.43      | 1.06 | 423   | 5.14E-01        | 0.00 | New     |
| 4q28.1   | rs908822   | 124906257 | C/T                          | 0.92 | 0.93 | 0.83 | 2.44E-01        | 0.08                                    | 0.34      | 0.13 | 7.24      | 1.41 | 230   | <b>7.14E-03</b> | 0.00                                                | 0.07 | 0.14      | 0.16 | 0.77      | 1.15 | 144   | 3.80E-01        | 0.00 | New     |
| 5p12     | rs10462065 | 44068846  | C/A                          | 0.89 | 0.89 | 1.05 | 7.28E-01        | 0.24                                    | 0.18      | 0.08 | 4.71      | 1.19 | 510   | <b>3.01E-02</b> | 0.01                                                | 0.12 | 0.05      | 0.12 | 0.19      | 1.05 | 237   | 6.66E-01        | 0.00 | New     |
| 6p24.3   | rs9381107  | 9469238   | G/A                          | 0.84 | 0.82 | 1.18 | 1.43E-01        | 0.32                                    | 0.02      | 0.08 | 0.04      | 1.02 | 503   | 8.43E-01        | 0.05                                                | 0.15 | -0.03     | 0.11 | 0.08      | 0.97 | 271   | 7.75E-01        | 0.00 | New     |
| 8p11.23  | rs13317    | 38269514  | T/C                          | 0.79 | 0.78 | 1.08 | 4.46E-01        | 0.31                                    | -0.08     | 0.07 | 1.24      | 0.92 | 582   | 2.65E-01        | 0.00                                                | 0.23 | -0.28     | 0.09 | 8.70      | 0.76 | 377   | <b>3.17E-03</b> | 0.00 | New     |
| 8q22.1   | rs12681366 | 95401265  | T/C                          | 0.68 | 0.66 | 1.09 | 3.01E-01        | 0.45                                    | -0.04     | 0.07 | 0.34      | 0.96 | 639   | 5.62E-01        | 0.00                                                | 0.31 | -0.11     | 0.09 | 1.45      | 0.90 | 381   | 2.28E-01        | 0.00 | New     |
| 8q22.1   | rs957448   | 95541302  | A/G                          | 0.77 | 0.74 | 1.14 | 1.49E-01        | 0.47                                    | -0.11     | 0.07 | 2.44      | 0.90 | 647   | 1.18E-01        | 0.00                                                | 0.23 | -0.08     | 0.10 | 0.69      | 0.92 | 348   | 4.07E-01        | 0.00 | New     |
| 9q22.32  | rs10512248 | 98259703  | T/G                          | 0.66 | 0.67 | 0.93 | 4.34E-01        | 0.28                                    | -0.21     | 0.09 | 6.03      | 0.81 | 441   | <b>1.41E-02</b> | 0.09                                                | 0.32 | -0.15     | 0.09 | 2.71      | 0.86 | 381   | 1.00E-01        | 0.02 | New     |
| 12q13.13 | rs3741442  | 53346750  | C/T                          | 0.99 | 1.00 | 0.72 | 5.42E-01        | 0.54                                    | -0.26     | 0.07 | 14.64     | 0.77 | 630   | <b>1.30E-04</b> | 0.01                                                | 0.02 | -0.73     | 0.33 | 5.01      | 0.48 | 38    | <b>2.52E-02</b> | 0.00 | New     |
| 12q13.2  | rs705704   | 56435412  | G/A                          | 0.66 | 0.69 | 0.86 | 7.44E-02        | 0.23                                    | 0.03      | 0.08 | 0.19      | 1.04 | 516   | 6.61E-01        | 0.00                                                | 0.35 | 0.28      | 0.09 | 10.58     | 1.32 | 439   | <b>1.15E-03</b> | 0.00 | New     |
| 12q21.1  | rs2304269  | 72080272  | T/C                          | 0.95 | 0.95 | 1.05 | 7.81E-01        | 0.43                                    | -0.16     | 0.07 | 4.92      | 0.85 | 564   | <b>2.66E-02</b> | 0.04                                                | 0.07 | -0.08     | 0.17 | 0.25      | 0.92 | 135   | 6.17E-01        | 0.00 | New     |
| 12q21.1  | rs7967428  | 72089040  | A/G                          | 0.95 | 0.95 | 1.00 | 9.91E-01        | 0.43                                    | -0.16     | 0.07 | 5.15      | 0.85 | 630   | <b>2.32E-02</b> | 0.00                                                | 0.07 | -0.07     | 0.17 | 0.17      | 0.93 | 136   | 6.78E-01        | 0.00 | New     |
| 14q22.1  | rs1748069  | 51839645  | C/T                          | 0.68 | 0.67 | 1.02 | 7.92E-01        | 0.17                                    | 0.02      | 0.10 | 0.02      | 1.02 | 306   | 8.75E-01        | 0.07                                                | 0.31 | 0.10      | 0.10 | 1.05      | 1.11 | 336   | 3.06E-01        | 0.04 | New     |
| 14q32.13 | rs1243572  | 95379499  | T/C                          | 0.21 | 0.22 | 0.91 | 3.65E-01        | 0.57                                    | -0.02     | 0.07 | 0.07      | 0.98 | 656   | 7.84E-01        | 0.00                                                | 0.23 | -0.07     | 0.10 | 0.46      | 0.94 | 355   | 4.99E-01        | 0.00 | New     |
| 14q32.13 | rs1243573  | 95379583  | A/C                          | 0.20 | 0.22 | 0.92 | 4.10E-01        | 0.57                                    | -0.02     | 0.07 | 0.07      | 0.98 | 656   | 7.84E-01        | 0.00                                                | 0.23 | -0.07     | 0.10 | 0.46      | 0.94 | 355   | 4.99E-01        | 0.00 | New     |
| 17q21.32 | rs4968247  | 44988703  | C/T                          | 0.34 | 0.33 | 1.07 | 4.81E-01        | 0.61                                    | 0.23      | 0.08 | 9.13      | 1.26 | 528   | <b>2.52E-03</b> | 0.05                                                | 0.33 | 0.14      | 0.09 | 2.40      | 1.15 | 372   | 1.21E-01        | 0.03 | New     |

|          |            |          |     |      |      |      |                 |      |       |      |      |      |     |                 |      |      |       |      |      |      |     |                 |      |          |
|----------|------------|----------|-----|------|------|------|-----------------|------|-------|------|------|------|-----|-----------------|------|------|-------|------|------|------|-----|-----------------|------|----------|
| 17q21.32 | rs1838105  | 45008935 | A/G | 0.39 | 0.33 | 1.27 | <b>5.83E-03</b> | 0.40 | 0.17  | 0.07 | 6.00 | 1.19 | 625 | <b>1.43E-02</b> | 0.00 | 0.38 | 0.12  | 0.08 | 2.22 | 1.13 | 449 | 1.37E-01        | 0.00 | New      |
| 2p24.2   | rs10172734 | 16733054 | G/A | 0.68 | 0.72 | 0.82 | <b>2.42E-02</b> | 0.29 | -0.14 | 0.08 | 3.59 | 0.87 | 555 | 5.83E-02        | 0.01 | 0.66 | -0.20 | 0.09 | 5.49 | 0.82 | 423 | <b>1.91E-02</b> | 0.00 | Reported |
| 2p24.2   | rs7552     | 16733928 | A/G | 0.68 | 0.72 | 0.82 | <b>2.52E-02</b> | 0.27 | -0.15 | 0.08 | 3.55 | 0.86 | 546 | 5.95E-02        | 0.01 | 0.66 | -0.20 | 0.09 | 5.28 | 0.82 | 424 | <b>2.15E-02</b> | 0.00 | Reported |
| 16p13.3  | rs2283487  | 3969886  | A/G | 0.38 | 0.35 | 1.13 | 1.49E-01        | 0.55 | 0.10  | 0.07 | 1.95 | 1.10 | 614 | 1.62E-01        | 0.01 | 0.36 | 0.22  | 0.08 | 6.92 | 1.25 | 440 | <b>8.51E-03</b> | 0.00 | Reported |
| 16p13.3  | rs17136624 | 3996282  | G/A | 0.70 | 0.73 | 0.87 | 1.19E-01        | 0.22 | 0.08  | 0.08 | 0.83 | 1.08 | 480 | 3.61E-01        | 0.00 | 0.28 | 0.09  | 0.09 | 0.90 | 1.09 | 397 | 3.43E-01        | 0.00 | Reported |

Central European Replication: replication study in 399 NSCL/P cases and 1,318 controls of Central European origin.

Asian case-parent trios for replication: replication study in 861 NSCL/P case-parent trios of Asian ancestry (including: Chinese, Singaporean, Taiwanese, Korean and Filipino).

European ancestry case-parent trios for replication: replication study in 557 NSCL/P case-parent trios of European ancestry.

The P value using logistic regression test;

**Supplementary Table 10. Comparisons of the allele frequencies for 9 previously reported SNPs obtained from the 22 reported loci among different populations based on GWAS data.**

| Loci   | Index SNPs | Alleles | MAF_cases | MAF_controls | Population       | Types        |
|--------|------------|---------|-----------|--------------|------------------|--------------|
| 1p22.1 | rs481931   | A       | 0.339     | /            | Asian & European | trios        |
|        |            |         | 0.351     | /            | European         | trios        |
|        |            |         | 0.332     | /            | Asian            | trios        |
|        |            | A/C     | 0.33      | 0.37         | Chinese Han      | case-control |
|        | rs560426   | G       | 0.399     | /            | Asian & European | trios        |
|        |            |         | 0.471     | /            | European         | trios        |
|        |            | 0.342   | /         | Asian        | trios            |              |
|        | G/A        | 0.32    | 0.3       | Chinese Han  | case-control     |              |
| 1q32.2 | rs861020   | A       | 0.245     | /            | Asian & European | trios        |
|        |            |         | 0.246     | /            | European         | trios        |
|        |            |         | 0.244     | /            | Asian            | trios        |
|        |            | A/G     | 0.24      | 0.19         | Chinese Han      | case-control |
|        | rs642961   | A/G     | 0.26      | /            | Norway           | trios        |
|        |            |         | 0.24      | /            | Denmark          | trios        |
|        |            |         | 0.25      | /            | EUROCRAN         | trios        |
|        |            |         | 0.24      | /            | Europe           | trios        |
|        |            | 0.32    | /         | Philippines  | trios            |              |
|        | A/G        | 0.24    | 0.19      | Chinese Han  | case-control     |              |

|         |                  |     |                            |                 |                                                          |                        |
|---------|------------------|-----|----------------------------|-----------------|----------------------------------------------------------|------------------------|
| 8q24.21 | <b>rs987525</b>  | A/C | <b>0.381(A)</b>            | <b>0.202(A)</b> | Central European                                         | case-control           |
|         |                  | A/C | <b>0.07</b>                | <b>0.07</b>     | Chinese Han                                              | case-control           |
|         | <b>rs1530300</b> | C/T | <b>0.478(C)</b>            | <b>0.301(C)</b> | Central European                                         | case-control           |
|         |                  | G/A | <b>0.05</b>                | <b>0.04</b>     | Chinese Han                                              | case-control           |
|         | <b>rs7017252</b> | T/C | <b>0.449(C)</b>            | <b>0.393(T)</b> | Central European                                         | case-control           |
|         |                  | A/G | <b>0.08</b>                | <b>0.05</b>     | Chinese Han                                              | case-control           |
| 15q13.3 | rs1258763        | G/A | 0.252<br>(nsCLP_hard+soft) | /               | European, Asian,<br>Central European,<br>Mexican, Yemeni | Meta (including trios) |
|         |                  |     | 0.119<br>(nsCLP_soft)      | /               | European, Asian,<br>Central European,<br>Mexican, Yemeni | Meta (including trios) |
|         |                  | A/G | 0.08                       | 0.07            | Chinese Han                                              | case-control           |
| 17q22   | rs227731         | C/A | 0.496 (A)                  | 0.416 (C)       | Central European                                         | case-control           |
|         |                  | C/A | 0.36                       | 0.32            | Chinese Han                                              | case-control           |

**Supplementary Table 11. Expression results for candidate genes identified in GWAS on mouse embryo drawn from EMAGE database.**

| Gene                  | Chr. | Symbol      | ID          | Structures                                         | Level    | Theiler Stage | Stage Given | EMAGE ID    |
|-----------------------|------|-------------|-------------|----------------------------------------------------|----------|---------------|-------------|-------------|
| <b>branchial arch</b> |      |             |             |                                                    |          |               |             |             |
| <i>IRF6</i>           | 1    | <i>Irf6</i> | MGI:1859211 | 1st branchial arch mandibular component            | weak     | TS17          | 10.5 dpc    | EMAGE:26246 |
| <i>IRF6</i>           | 1    | <i>Irf6</i> | MGI:1859211 | 1st branchial arch maxillary component             | weak     | TS17          | 10.5 dpc    | EMAGE:26246 |
| <i>IRF6</i>           | 1    | <i>Irf6</i> | MGI:1859211 | 2nd branchial arch                                 | weak     | TS17          | 10.5 dpc    | EMAGE:26246 |
| <i>MSX1</i>           | 4    | <i>Msx1</i> | MGI:97168   | 1st branchial arch                                 | strong   | TS15          | 9.5 dpc     | EMAGE:3839  |
| <i>MSX1</i>           | 4    | <i>Msx1</i> | MGI:97168   | 1st branchial arch maxillary component             | moderate | TS15          | 9.5 dpc     | EMAGE:5411  |
| <i>MSX1</i>           | 4    | <i>Msx1</i> | MGI:97168   | 1st branchial arch mandibular component            | moderate | TS15          | 9.5 dpc     | EMAGE:5411  |
| <i>MSX1</i>           | 4    | <i>Msx1</i> | MGI:97168   | 1st branchial arch mandibular component            | weak     | TS15          | 9.5 dpc     | EMAGE:24726 |
| <i>MSX1</i>           | 4    | <i>Msx1</i> | MGI:97168   | 2nd branchial arch                                 | weak     | TS15          | 9.5 dpc     | EMAGE:3839  |
| <i>MSX1</i>           | 4    | <i>Msx1</i> | MGI:97168   | 2nd branchial arch mesenchyme                      | moderate | TS15          | 9.5 dpc     | EMAGE:5411  |
| <i>MSX1</i>           | 4    | <i>Msx1</i> | MGI:97168   | 3rd branchial arch                                 | weak     | TS15          | 9.5 dpc     | EMAGE:3839  |
| <i>MSX1</i>           | 4    | <i>Msx1</i> | MGI:97168   | 1st branchial arch maxillary component             | moderate | TS17          | 10.5dpc     | EMAGE:5290  |
| <i>MSX1</i>           | 4    | <i>Msx1</i> | MGI:97168   | 1st branchial arch maxillary component             | weak     | TS17          | 10.5 dpc    | EMAGE:26194 |
| <i>MSX1</i>           | 4    | <i>Msx1</i> | MGI:97168   | 1st branchial arch mandibular component            | weak     | TS17          | 10.5 dpc    | EMAGE:26194 |
| <i>MSX1</i>           | 4    | <i>Msx1</i> | MGI:97168   | 1st branchial arch mandibular component mesenchyme | strong   | TS18          | 10.5 dpc    | EMAGE:653   |
| <i>MSX1</i>           | 4    | <i>Msx1</i> | MGI:97168   | 1st branchial arch maxillary component mesenchyme  | strong   | TS18          | 10.5 dpc    | EMAGE:653   |
| <i>MSX1</i>           | 4    | <i>Msx1</i> | MGI:97168   | 1st branchial arch maxillary component mesenchyme  | strong   | TS18          | 10.5 dpc    | EMAGE:3277  |
| <i>MSX1</i>           | 4    | <i>Msx1</i> | MGI:97168   | 1st branchial arch mandibular component ectoderm   | strong   | TS17          | 10.5dpc     | EMAGE:5290  |

|              |    |              |             |                                                                              |          |      |               |             |
|--------------|----|--------------|-------------|------------------------------------------------------------------------------|----------|------|---------------|-------------|
| <i>MSX1</i>  | 4  | <i>Msx1</i>  | MGI:97168   | 2nd branchial arch                                                           | weak     | TS17 | 10.5 dpc      | EMAGE:26194 |
| <i>MSX1</i>  | 4  | <i>Msx1</i>  | MGI:97168   | branchial arch                                                               | strong   | TS18 | 10.5 dpc      | EMAGE:3518  |
| <i>MSX1</i>  | 4  | <i>Msx1</i>  | MGI:97168   | 1st branchial arch mandibular component mesenchyme                           | moderate | TS18 | 11 dpc        | EMAGE:493   |
| <i>MSX1</i>  | 4  | <i>Msx1</i>  | MGI:97168   | 1st branchial arch maxillary component mesenchyme                            | moderate | TS18 | 11 dpc        | EMAGE:493   |
| <i>MSX1</i>  | 4  | <i>Msx1</i>  | MGI:97168   | 1st branchial arch mandibular component mesenchyme                           | -        | TS18 | 11.5 dpc      | EMAGE:158   |
| <i>MSX1</i>  | 4  | <i>Msx1</i>  | MGI:97168   | 1st branchial arch maxillary component mesenchyme                            | -        | TS18 | 11.5 dpc      | EMAGE:158   |
| <i>MSX1</i>  | 4  | <i>Msx1</i>  | MGI:97168   | 1st branchial arch mandibular component mesenchyme derived from neural crest | -        | TS18 | 11.5 dpc      | EMAGE:158   |
| <i>MSX1</i>  | 4  | <i>Msx1</i>  | MGI:97168   | 1st branchial arch maxillary component mesenchyme derived from neural crest  | -        | TS18 | 11.5 dpc      | EMAGE:158   |
| <i>MSX1</i>  | 4  | <i>Msx1</i>  | MGI:97168   | 1st branchial groove                                                         | -        | TS18 | 11.5 dpc      | EMAGE:158   |
| <i>MSX1</i>  | 4  | <i>Msx1</i>  | MGI:97168   | 2nd branchial arch mesenchyme derived from neural crest                      | -        | TS18 | 11.5 dpc      | EMAGE:158   |
| <i>MSX1</i>  | 4  | <i>Msx1</i>  | MGI:97168   | 2nd branchial arch                                                           | strong   | TS19 | 11.5 dpc      | EMAGE:27695 |
| <i>MSX1</i>  | 4  | <i>Msx1</i>  | MGI:97168   | 2nd branchial arch mesenchyme                                                | detected | TS19 | 11.5 dpc      | EMAGE:3278  |
| <i>MSX1</i>  | 4  | <i>Msx1</i>  | MGI:97168   | 3rd branchial arch mesenchyme                                                | -        | TS18 | 11.5 dpc      | EMAGE:158   |
| <i>MSX1</i>  | 4  | <i>Msx1</i>  | MGI:97168   | 3rd branchial arch mesenchyme derived from neural crest                      | -        | TS18 | 11.5 dpc      | EMAGE:158   |
| <i>MSX1</i>  | 4  | <i>Msx1</i>  | MGI:97168   | 4th branchial arch mesenchyme derived from neural crest                      | -        | TS18 | 11.5 dpc      | EMAGE:158   |
| <i>MSX1</i>  | 4  | <i>Msx1</i>  | MGI:97168   | 1st branchial arch mesenchyme derived from neural crest                      | strong   | TS14 | 17 Somite no. | EMAGE:628   |
| <i>MSX1</i>  | 4  | <i>Msx1</i>  | MGI:97168   | 2nd branchial arch mesenchyme derived from neural crest                      | strong   | TS14 | 17 Somite no. | EMAGE:628   |
| <i>SPRY1</i> | 4  | <i>Spry1</i> | MGI:1345139 | 1st branchial arch mandibular component mesenchyme                           | -        | TS17 | 10.5 dpc      | EMAGE:3624  |
| <i>SPRY1</i> | 4  | <i>Spry1</i> | MGI:1345139 | 1st branchial arch maxillary component mesenchyme                            | -        | TS17 | 10.5 dpc      | EMAGE:3624  |
| <i>CDK2</i>  | 12 | <i>Cdk2</i>  | MGI:104772  | 1st branchial arch maxillary component                                       | strong   | TS15 | 9.5 dpc       | EMAGE:25561 |
| <i>CDK2</i>  | 12 | <i>Cdk2</i>  | MGI:104772  | 1st branchial arch mandibular component                                      | strong   | TS15 | 9.5 dpc       | EMAGE:25561 |
| <i>CDK2</i>  | 12 | <i>Cdk2</i>  | MGI:104772  | 2nd branchial arch                                                           | strong   | TS15 | 9.5 dpc       | EMAGE:25561 |
| <i>CDK2</i>  | 12 | <i>Cdk2</i>  | MGI:104772  | 1st branchial arch mandibular component                                      | strong   | TS17 | 10.5 dpc      | EMAGE:27046 |
| <i>CDK2</i>  | 12 | <i>Cdk2</i>  | MGI:104772  | 1st branchial arch maxillary component                                       | strong   | TS17 | 10.5 dpc      | EMAGE:27046 |
| <i>ERBB3</i> | 12 | <i>ErbB3</i> | MGI:95411   | branchial arch                                                               | detected | TS16 | 10.5 dpc      | EMAGE:5299  |



|              |    |              |             |                                                         |          |      |          |             |
|--------------|----|--------------|-------------|---------------------------------------------------------|----------|------|----------|-------------|
| <i>ERBB3</i> | 12 | <i>ErbB3</i> | MGI:95411   | 3rd branchial arch mesenchyme derived from neural crest | detected | TS16 | 10.5 dpc | EMAGE:5299  |
| <i>ERBB3</i> | 12 | <i>ErbB3</i> | MGI:95411   | 4th branchial arch mesenchyme derived from neural crest | detected | TS16 | 10.5 dpc | EMAGE:5299  |
| <i>SPRY2</i> | 13 | <i>Spry2</i> | MGI:1345138 | 1st branchial arch mandibular component mesenchyme      | detected | TS15 | 9.75 dpc | EMAGE:4618  |
| <i>SPRY2</i> | 13 | <i>Spry2</i> | MGI:1345138 | 1st branchial arch maxillary component mesenchyme       | detected | TS15 | 9.75 dpc | EMAGE:4618  |
| <i>SPRY2</i> | 13 | <i>Spry2</i> | MGI:1345138 | 1st branchial groove ectoderm                           | detected | TS15 | 9.75 dpc | EMAGE:4618  |
| <i>SPRY2</i> | 13 | <i>Spry2</i> | MGI:1345138 | 1st branchial pouch                                     | detected | TS15 | 9.75 dpc | EMAGE:4618  |
| <i>SPRY2</i> | 13 | <i>Spry2</i> | MGI:1345138 | 2nd branchial arch                                      | detected | TS15 | 9.75 dpc | EMAGE:4618  |
| <i>SPRY2</i> | 13 | <i>Spry2</i> | MGI:1345138 | 2nd branchial groove ectoderm                           | detected | TS15 | 9.75 dpc | EMAGE:4618  |
| <i>SPRY2</i> | 13 | <i>Spry2</i> | MGI:1345138 | 2nd branchial pouch                                     | detected | TS15 | 9.75 dpc | EMAGE:4618  |
| <i>SPRY2</i> | 13 | <i>Spry2</i> | MGI:1345138 | 3rd branchial arch                                      | detected | TS15 | 9.75 dpc | EMAGE:4618  |
| <i>SPRY2</i> | 13 | <i>Spry2</i> | MGI:1345138 | 3rd branchial groove ectoderm                           | detected | TS15 | 9.75 dpc | EMAGE:4618  |
| <i>SPRY2</i> | 13 | <i>Spry2</i> | MGI:1345138 | 3rd branchial pouch                                     | detected | TS15 | 9.75 dpc | EMAGE:4618  |
| <i>GSC</i>   | 14 | <i>Gsc</i>   | MGI:95841   | 1st branchial arch                                      | detected | TS17 | 10.5 dpc | EMAGE:732   |
| <i>GSC</i>   | 14 | <i>Gsc</i>   | MGI:95841   | 1st branchial arch                                      | detected | TS17 | 10.5 dpc | EMAGE:3973  |
| <i>GSC</i>   | 14 | <i>Gsc</i>   | MGI:95841   | 1st branchial arch mandibular component                 | strong   | TS17 | 10.5 dpc | EMAGE:26593 |
| <i>GSC</i>   | 14 | <i>Gsc</i>   | MGI:95841   | 1st branchial arch maxillary component                  | strong   | TS17 | 10.5 dpc | EMAGE:26593 |
| <i>GSC</i>   | 14 | <i>Gsc</i>   | MGI:95841   | 2nd branchial arch                                      | detected | TS17 | 10.5 dpc | EMAGE:732   |
| <i>GSC</i>   | 14 | <i>Gsc</i>   | MGI:95841   | 2nd branchial arch                                      | detected | TS17 | 10.5 dpc | EMAGE:3973  |
| <i>GSC</i>   | 14 | <i>Gsc</i>   | MGI:95841   | 2nd branchial arch                                      | strong   | TS17 | 10.5 dpc | EMAGE:26593 |
| <i>GSC</i>   | 14 | <i>Gsc</i>   | MGI:95841   | branchial arch                                          | strong   | TS17 | 10.5 dpc | EMAGE:732   |
| <i>GSC</i>   | 14 | <i>Gsc</i>   | MGI:95841   | 1st branchial groove                                    | strong   | TS19 | 11.5 dpc | EMAGE:5405  |
| <i>GSC</i>   | 14 | <i>Gsc</i>   | MGI:95841   | 2nd branchial arch                                      | strong   | TS19 | 11.5 dpc | EMAGE:28094 |
| <i>WNT9B</i> | 17 | <i>Wnt9b</i> | MGI:1197020 | 1st branchial arch maxillary component                  | strong   | TS17 | 10.5 dpc | EMAGE:4987  |
| <i>WNT9B</i> | 17 | <i>Wnt9b</i> | MGI:1197020 | 1st branchial arch maxillary component                  | strong   | TS18 | 10.5 dpc | EMAGE:5279  |
| <i>WNT9B</i> | 17 | <i>Wnt9b</i> | MGI:1197020 | 1st branchial arch mandibular component                 | strong   | TS17 | 10.5 dpc | EMAGE:4987  |
| <i>WNT9B</i> | 17 | <i>Wnt9b</i> | MGI:1197020 | 1st branchial arch mandibular component ectoderm        | strong   | TS18 | 10.5 dpc | EMAGE:5279  |

|                 |    |              |             |                                        |          |      |          |             |
|-----------------|----|--------------|-------------|----------------------------------------|----------|------|----------|-------------|
| <i>WNT9B</i>    | 17 | <i>Wnt9b</i> | MGI:1197020 | 2nd branchial arch                     | strong   | TS17 | 10.5 dpc | EMAGE:4987  |
| <i>WNT9B</i>    | 17 | <i>Wnt9b</i> | MGI:1197020 | 3rd branchial arch                     | strong   | TS17 | 10.5 dpc | EMAGE:4987  |
| <i>MAFB</i>     | 20 | <i>Mafb</i>  | MGI:1914981 | 1st branchial arch maxillary component | strong   | TS17 | 10.5 dpc | EMAGE:26188 |
| <b>maxilla</b>  |    |              |             |                                        |          |      |          |             |
| <i>IRF6</i>     | 1  | <i>Irf6</i>  | MGI:1859211 | maxillary process                      | strong   | TS19 | 11.5 dpc | EMAGE:27747 |
| <i>MSX1</i>     | 4  | <i>Msx1</i>  | MGI:97168   | maxillary process                      | strong   | TS19 | 11.5 dpc | EMAGE:27695 |
| <i>MSX1</i>     | 4  | <i>Msx1</i>  | MGI:97168   | maxillary process                      | detected | TS19 | 11.5 dpc | EMAGE:3278  |
| <i>GSC</i>      | 14 | <i>Gsc</i>   | MGI:95841   | maxillary process                      | strong   | TS19 | 11.5 dpc | EMAGE:5405  |
| <i>GSC</i>      | 14 | <i>Gsc</i>   | MGI:95841   | maxillary process                      | strong   | TS19 | 11.5 dpc | EMAGE:28094 |
| <i>GSC</i>      | 14 | <i>Gsc</i>   | MGI:95841   | maxillary process epithelium           | strong   | TS20 | 12.5 dpc | EMAGE:5390  |
| <i>WNT9B</i>    | 17 | <i>Wnt9b</i> | MGI:1197020 | maxillary process                      | strong   | TS19 | 11.5 dpc | EMAGE:4989  |
| <i>WNT9B</i>    | 17 | <i>Wnt9b</i> | MGI:1197020 | maxillary process                      | moderate | TS20 | 12.5 dpc | EMAGE:4984  |
| <i>WNT9B</i>    | 17 | <i>Wnt9b</i> | MGI:1197020 | maxillary process epithelium           | moderate | TS20 | 12.5 dpc | EMAGE:4984  |
| <i>MAFB</i>     | 20 | <i>Mafb</i>  | MGI:1914981 | maxillary process                      | strong   | TS19 | 11.5 dpc | EMAGE:27689 |
| <b>mandible</b> |    |              |             |                                        |          |      |          |             |
| <i>IRF6</i>     | 1  | <i>Irf6</i>  | MGI:1859211 | lower jaw molar                        | strong   | TS23 | 14.5 dpc | EMAGE:6816  |
| <i>MSX1</i>     | 4  | <i>Msx1</i>  | MGI:97168   | mandibular process                     | strong   | TS19 | 11.5 dpc | EMAGE:27695 |
| <i>MSX1</i>     | 4  | <i>Msx1</i>  | MGI:97168   | mandibular process                     | moderate | TS19 | 11.5 dpc | EMAGE:5291  |
| <i>MSX1</i>     | 4  | <i>Msx1</i>  | MGI:97168   | mandibular process mesenchyme          | detected | TS19 | 11.5 dpc | EMAGE:3278  |
| <i>KRT18</i>    | 12 | <i>Krt18</i> | MGI:96692   | lower jaw incisor                      | moderate | TS23 | 14.5 dpc | EMAGE:11923 |
| <i>KRT18</i>    | 12 | <i>Krt18</i> | MGI:96692   | lower jaw molar                        | moderate | TS23 | 14.5 dpc | EMAGE:11923 |
| <i>GSC</i>      | 14 | <i>Gsc</i>   | MGI:95841   | mandibular process                     | strong   | TS19 | 11.5 dpc | EMAGE:5405  |
| <i>GSC</i>      | 14 | <i>Gsc</i>   | MGI:95841   | mandibular process                     | strong   | TS19 | 11.5 dpc | EMAGE:28094 |
| <i>WNT9B</i>    | 17 | <i>Wnt9b</i> | MGI:1197020 | mandibular process                     | strong   | TS19 | 11.5 dpc | EMAGE:4989  |

**lip**

|              |    |              |             |                   |          |      |          |             |
|--------------|----|--------------|-------------|-------------------|----------|------|----------|-------------|
| <i>MSX1</i>  | 4  | <i>Msx1</i>  | MGI:97168   | rest of upper lip | strong   | TS21 | 13.5 dpc | EMAGE:5413  |
| <i>MSX1</i>  | 4  | <i>Msx1</i>  | MGI:97168   | rest of upper lip | strong   | TS22 | -        | EMAGE:5414  |
| <i>WNT9B</i> | 17 | <i>Wnt9b</i> | MGI:1197020 | upper lip         | moderate | TS21 | 13.5 dpc | EMAGE:4985  |
| <i>WNT9B</i> | 17 | <i>Wnt9b</i> | MGI:1197020 | upper lip         | strong   | TS22 | 14.5 dpc | EMAGE:4986  |
| <i>MAFB</i>  | 20 | <i>Mafb</i>  | MGI:1914981 | lower lip         | moderate | TS23 | 14.5 dpc | EMAGE:19184 |

**palate**

|              |    |              |             |                           |          |      |          |             |
|--------------|----|--------------|-------------|---------------------------|----------|------|----------|-------------|
| <i>KRT18</i> | 12 | <i>Krt18</i> | MGI:96692   | palatal shelf epithelium  | moderate | TS23 | 14.5 dpc | EMAGE:11923 |
| <i>GSC</i>   | 14 | <i>Gsc</i>   | MGI:95841   | palatal shelf             | strong   | TS20 | 12.5 dpc | EMAGE:5390  |
| <i>GSC</i>   | 14 | <i>Gsc</i>   | MGI:95841   | palatal shelf             | weak     | TS21 | 13.5 dpc | EMAGE:5391  |
| <i>WNT9B</i> | 17 | <i>Wnt9b</i> | MGI:1197020 | primary palate epithelium | weak     | TS20 | 12.5 dpc | EMAGE:4984  |
| <i>WNT9B</i> | 17 | <i>Wnt9b</i> | MGI:1197020 | palatal shelf epithelium  | weak     | TS21 | 13.5 dpc | EMAGE:4985  |

**oral**

|              |    |              |             |                        |          |      |          |             |
|--------------|----|--------------|-------------|------------------------|----------|------|----------|-------------|
| <i>IRF6</i>  | 1  | <i>Irf6</i>  | MGI:1859211 | oral epithelium        | strong   | TS23 | 14.5 dpc | EMAGE:6816  |
| <i>VAX1</i>  | 10 | <i>Vax1</i>  | MGI:1277163 | oral region epithelium | detected | TS17 | 12.5 dpc | EMAGE:542   |
| <i>KRT18</i> | 12 | <i>Krt18</i> | MGI:96692   | oral epithelium        | moderate | TS23 | 14.5 dpc | EMAGE:11923 |
| <i>KRT8</i>  | 12 | <i>Krt8</i>  | MGI:1921377 | oral epithelium        | moderate | TS23 | 14.5 dpc | EMAGE:10450 |

**frontal process**

|             |   |             |           |                            |   |      |          |           |
|-------------|---|-------------|-----------|----------------------------|---|------|----------|-----------|
| <i>MSX1</i> | 4 | <i>Msx1</i> | MGI:97168 | frontal process mesenchyme | - | TS18 | 11.5 dpc | EMAGE:158 |
|-------------|---|-------------|-----------|----------------------------|---|------|----------|-----------|

**philtrum**

|             |   |             |           |          |      |      |          |            |
|-------------|---|-------------|-----------|----------|------|------|----------|------------|
| <i>MSX1</i> | 4 | <i>Msx1</i> | MGI:97168 | philtrum | weak | TS21 | 13.5 dpc | EMAGE:5413 |
|-------------|---|-------------|-----------|----------|------|------|----------|------------|

**others**

**nose**

|              |    |              |             |                           |          |      |          |             |
|--------------|----|--------------|-------------|---------------------------|----------|------|----------|-------------|
| <i>IRF6</i>  | 1  | <i>Irf6</i>  | MGI:1859211 | naris                     | strong   | TS23 | 14.5 dpc | EMAGE:6816  |
| <i>MSX1</i>  | 4  | <i>Msx1</i>  | MGI:97168   | nose                      | strong   | TS20 | 12.5 dpc | EMAGE:5412  |
| <i>MSX1</i>  | 4  | <i>Msx1</i>  | MGI:97168   | nose                      | -        | TS18 | 11.5 dpc | EMAGE:158   |
| <i>BAG4</i>  | 8  | <i>Bag4</i>  | MGI:1914634 | naris                     | strong   | TS23 | 14.5 dpc | EMAGE:10095 |
| <i>VAX1</i>  | 10 | <i>Vax1</i>  | MGI:1277163 | nose                      | detected | TS17 | 12.5 dpc | EMAGE:542   |
| <i>KRT18</i> | 12 | <i>Krt18</i> | MGI:96692   | naris                     | strong   | TS23 | 14.5 dpc | EMAGE:11923 |
| <i>ERBB3</i> | 12 | <i>ErbB3</i> | MGI:95411   | anterior naris epithelium | moderate | TS23 | 14.5 dpc | EMAGE:16072 |
| <i>ERBB3</i> | 12 | <i>ErbB3</i> | MGI:95411   | external naris epithelium | moderate | TS23 | 14.5 dpc | EMAGE:16072 |
| <i>WNT9B</i> | 17 | <i>Wnt9b</i> | MGI:1197020 | nose                      | strong   | TS22 | 14.5 dpc | EMAGE:4986  |

**nasal**

|             |   |             |           |                                 |          |      |          |            |
|-------------|---|-------------|-----------|---------------------------------|----------|------|----------|------------|
| <i>MSX1</i> | 4 | <i>Msx1</i> | MGI:97168 | fronto-nasal process            | weak     | TS15 | 9.5 dpc  | EMAGE:3839 |
| <i>MSX1</i> | 4 | <i>Msx1</i> | MGI:97168 | medial-nasal process            | strong   | TS18 | 10.5 dpc | EMAGE:653  |
| <i>MSX1</i> | 4 | <i>Msx1</i> | MGI:97168 | medial-nasal process            | strong   | TS18 | 10.5 dpc | EMAGE:3277 |
| <i>MSX1</i> | 4 | <i>Msx1</i> | MGI:97168 | medial-nasal process            | strong   | TS17 | 10.5dpc  | EMAGE:5290 |
| <i>MSX1</i> | 4 | <i>Msx1</i> | MGI:97168 | latero-nasal process            | strong   | TS18 | 10.5 dpc | EMAGE:653  |
| <i>MSX1</i> | 4 | <i>Msx1</i> | MGI:97168 | latero-nasal process            | strong   | TS18 | 10.5 dpc | EMAGE:3277 |
| <i>MSX1</i> | 4 | <i>Msx1</i> | MGI:97168 | latero-nasal process            | strong   | TS17 | 10.5dpc  | EMAGE:5290 |
| <i>MSX1</i> | 4 | <i>Msx1</i> | MGI:97168 | medial-nasal process mesenchyme | moderate | TS18 | 11 dpc   | EMAGE:493  |
| <i>MSX1</i> | 4 | <i>Msx1</i> | MGI:97168 | latero-nasal process mesenchyme | moderate | TS18 | 11 dpc   | EMAGE:493  |
| <i>MSX1</i> | 4 | <i>Msx1</i> | MGI:97168 | nasal epithelium                | -        | TS18 | 11.5 dpc | EMAGE:158  |
| <i>MSX1</i> | 4 | <i>Msx1</i> | MGI:97168 | medial-nasal process            | detected | TS19 | 11.5 dpc | EMAGE:3278 |
| <i>MSX1</i> | 4 | <i>Msx1</i> | MGI:97168 | medial-nasal process            | strong   | TS19 | 11.5 dpc | EMAGE:5291 |
| <i>MSX1</i> | 4 | <i>Msx1</i> | MGI:97168 | medial-nasal process mesenchyme | -        | TS18 | 11.5 dpc | EMAGE:158  |
| <i>MSX1</i> | 4 | <i>Msx1</i> | MGI:97168 | latero-nasal process            | detected | TS19 | 11.5 dpc | EMAGE:3278 |

|                 |    |              |             |                                                |          |      |          |             |
|-----------------|----|--------------|-------------|------------------------------------------------|----------|------|----------|-------------|
| <i>MSX1</i>     | 4  | <i>Msx1</i>  | MGI:97168   | latero-nasal process                           | strong   | TS19 | 11.5 dpc | EMAGE:5291  |
| <i>MSX1</i>     | 4  | <i>Msx1</i>  | MGI:97168   | latero-nasal process mesenchyme                | -        | TS18 | 11.5 dpc | EMAGE:158   |
| <i>MSX1</i>     | 4  | <i>Msx1</i>  | MGI:97168   | nasal cavity epitheliumnasal cavity epithelium | detected | TS20 | 12.5 dpc | EMAGE:646   |
| <i>SPRY1</i>    | 4  | <i>Spry1</i> | MGI:1345139 | fronto-nasal process                           | -        | TS19 | 10.5 dpc | EMAGE:1252  |
| <i>FGF10</i>    | 5  | <i>Fgf10</i> | MGI:1099809 | nasal epithelium                               | detected | TS17 | 10.5 dpc | EMAGE:3769  |
| <i>VAX1</i>     | 10 | <i>Vax1</i>  | MGI:1277163 | fronto-nasal process                           | detected | TS15 | 9.5 dpc  | EMAGE:253   |
| <i>VAX1</i>     | 10 | <i>Vax1</i>  | MGI:1277163 | fronto-nasal process ectoderm                  | detected | TS15 | 9.5 dpc  | EMAGE:253   |
| <i>SPRY2</i>    | 13 | <i>Spry2</i> | MGI:1345138 | fronto-nasal process                           | detected | TS18 | 10.5 dpc | EMAGE:4619  |
| <i>GSC</i>      | 14 | <i>Gsc</i>   | MGI:95841   | fronto-nasal process                           | detected | TS17 | 10.5 dpc | EMAGE:3973  |
| <i>GSC</i>      | 14 | <i>Gsc</i>   | MGI:95841   | medial-nasal process                           | strong   | TS19 | 11.5 dpc | EMAGE:5405  |
| <i>GSC</i>      | 14 | <i>Gsc</i>   | MGI:95841   | latero-nasal process                           | strong   | TS19 | 11.5 dpc | EMAGE:5405  |
| <i>WNT9B</i>    | 17 | <i>Wnt9b</i> | MGI:1197020 | medial-nasal process                           | strong   | TS17 | 10.5 dpc | EMAGE:4987  |
| <i>WNT9B</i>    | 17 | <i>Wnt9b</i> | MGI:1197020 | medial-nasal process                           | strong   | TS18 | 10.5 dpc | EMAGE:5279  |
| <i>WNT9B</i>    | 17 | <i>Wnt9b</i> | MGI:1197020 | latero-nasal process                           | strong   | TS17 | 10.5 dpc | EMAGE:4987  |
| <i>WNT9B</i>    | 17 | <i>Wnt9b</i> | MGI:1197020 | latero-nasal process                           | strong   | TS18 | 10.5 dpc | EMAGE:5279  |
| <i>WNT9B</i>    | 17 | <i>Wnt9b</i> | MGI:1197020 | medial-nasal process                           | weak     | TS19 | 11.5 dpc | EMAGE:4989  |
| <i>WNT9B</i>    | 17 | <i>Wnt9b</i> | MGI:1197020 | latero-nasal process                           | moderate | TS19 | 11.5 dpc | EMAGE:4989  |
| <i>NOG</i>      | 17 | <i>Nog</i>   | MGI:104327  | nasal septum                                   | weak     | TS23 | 14.5 dpc | EMAGE:8431  |
| <b>maxilla</b>  |    |              |             |                                                |          |      |          |             |
| <i>PTCH1</i>    | 9  | <i>Ptch1</i> | MGI:105373  | maxilla                                        | moderate | TS23 | 14.5 dpc | EMAGE:16248 |
| <i>PTCH1</i>    | 9  | <i>Ptch1</i> | MGI:105373  | maxilla                                        | -        | TS23 | 14.5 dpc | EMAGE:21444 |
| <i>PTCH1</i>    | 9  | <i>Ptch1</i> | MGI:105373  | upper jaw                                      | -        | TS23 | 14.5 dpc | EMAGE:21444 |
| <b>mandible</b> |    |              |             |                                                |          |      |          |             |
| <i>IRF6</i>     | 1  | <i>Irf6</i>  | MGI:1859211 | lower jaw molar                                | strong   | TS23 | 14.5 dpc | EMAGE:6816  |
| <i>MMP16</i>    | 8  | <i>Mmp16</i> | MGI:1276107 | mandible                                       | moderate | TS23 | 14.5 dpc | EMAGE:7073  |

|               |    |              |             |                          |          |      |               |             |  |
|---------------|----|--------------|-------------|--------------------------|----------|------|---------------|-------------|--|
| <i>PTCHI</i>  | 9  | <i>Ptch1</i> | MGI:105373  | mandible                 | moderate | TS23 | 14.5 dpc      | EMAGE:16248 |  |
| <i>PTCHI</i>  | 9  | <i>Ptch1</i> | MGI:105373  | mandible                 | -        | TS23 | 14.5 dpc      | EMAGE:21444 |  |
| <i>PTCHI</i>  | 9  | <i>Ptch1</i> | MGI:105373  | lower jaw                | -        | TS23 | 14.5 dpc      | EMAGE:21444 |  |
| <i>KRT18</i>  | 12 | <i>Krt18</i> | MGI:96692   | lower jaw incisor        | moderate | TS23 | 14.5 dpc      | EMAGE:11923 |  |
| <i>KRT18</i>  | 12 | <i>Krt18</i> | MGI:96692   | lower jaw molar          | moderate | TS23 | 14.5 dpc      | EMAGE:11923 |  |
| <i>NOG</i>    | 17 | <i>Nog</i>   | MGI:104327  | mandible                 | weak     | TS23 | 14.5 dpc      | EMAGE:8431  |  |
| <b>tooth</b>  |    |              |             |                          |          |      |               |             |  |
| <i>IRF6</i>   | 1  | <i>Irf6</i>  | MGI:1859211 | upper jaw incisor        | strong   | TS23 | 14.5 dpc      | EMAGE:6816  |  |
| <i>IRF6</i>   | 1  | <i>Irf6</i>  | MGI:1859211 | upper jaw molar          | strong   | TS23 | 14.5 dpc      | EMAGE:6816  |  |
| <i>PTCHI</i>  | 9  | <i>Ptch1</i> | MGI:105373  | upper jaw incisor        | weak     | TS23 | 14.5 dpc      | EMAGE:16248 |  |
| <i>PTCHI</i>  | 9  | <i>Ptch1</i> | MGI:105373  | lower jaw incisor        | weak     | TS23 | 14.5 dpc      | EMAGE:16248 |  |
| <i>KRT18</i>  | 12 | <i>Krt18</i> | MGI:96692   | upper jaw incisor        | moderate | TS23 | 14.5 dpc      | EMAGE:11923 |  |
| <i>KRT18</i>  | 12 | <i>Krt18</i> | MGI:96692   | upper jaw molar          | moderate | TS23 | 14.5 dpc      | EMAGE:11923 |  |
| <b>embryo</b> |    |              |             |                          |          |      |               |             |  |
| <i>MSX1</i>   | 4  | <i>Msx1</i>  | MGI:97168   | surface ectoderm         | strong   | TS15 | 9.5 dpc       | EMAGE:548   |  |
| <i>MSX1</i>   | 4  | <i>Msx1</i>  | MGI:97168   | surface ectoderm         | detected | TS15 | 9.5 dpc       | EMAGE:647   |  |
| <i>MSX1</i>   | 4  | <i>Msx1</i>  | MGI:97168   | embryo                   | detected | TS21 | 12.5 dpc      | EMAGE:3844  |  |
| <i>MSX1</i>   | 4  | <i>Msx1</i>  | MGI:97168   | extraembryonic component | strong   | TS14 | 17 Somite no. | EMAGE:628   |  |
| <i>SPRY1</i>  | 4  | <i>Spry1</i> | MGI:1345139 | embryo                   | -        | TS15 | 9.5 dpc       | EMAGE:4873  |  |
| <i>SPRY1</i>  | 4  | <i>Spry1</i> | MGI:1345139 | embryo                   | -        | TS17 | 10.5 dpc      | EMAGE:4874  |  |
| <i>SPRY1</i>  | 4  | <i>Spry1</i> | MGI:1345139 | embryo                   | -        | TS19 | 11.5 dpc      | EMAGE:4875  |  |
| <i>SPRY1</i>  | 4  | <i>Spry1</i> | MGI:1345139 | embryo                   | -        | TS20 | 12.5 dpc      | EMAGE:4876  |  |
| <i>FGF10</i>  | 5  | <i>Fgf10</i> | MGI:1099809 | embryo                   | detected | TS17 | 10.5 dpc      | EMAGE:6108  |  |
| <i>FGF10</i>  | 5  | <i>Fgf10</i> | MGI:1099809 | surface ectoderm         | detected | TS17 | 10.5 dpc      | EMAGE:3769  |  |
| <i>FGF10</i>  | 5  | <i>Fgf10</i> | MGI:1099809 | embryo                   |          | TS23 | 14.5 dpc      | EMAGE:9080  |  |

|               |    |               |             |                          |          |      |                      |             |
|---------------|----|---------------|-------------|--------------------------|----------|------|----------------------|-------------|
| <i>PTCHI</i>  | 9  | <i>Ptch1</i>  | MGI:105373  | embryo                   | detected | TS17 | 9.0 dpc              | EMAGE:813   |
| <i>PTCHI</i>  | 9  | <i>Ptch1</i>  | MGI:105373  | embryo                   | detected | TS17 | 9.0 dpc              | EMAGE:3423  |
| <i>PTCHI</i>  | 9  | <i>Ptch1</i>  | MGI:105373  | embryo                   | strong   | TS18 | 10.5 dpc             | EMAGE:3696  |
| <i>PTCHI</i>  | 9  | <i>Ptch1</i>  | MGI:105373  | embryo                   | -        | TS23 | 14.5 dpc             | EMAGE:21444 |
| <i>VAX1</i>   | 10 | <i>Vax1</i>   | MGI:1277163 | embryo                   | detected | TS12 | 8.0 dpc              | EMAGE:252   |
| <i>VAX1</i>   | 10 | <i>Vax1</i>   | MGI:1277163 | surface ectoderm         | detected | TS12 | 8.0 dpc              | EMAGE:252   |
| <i>KRT8</i>   | 12 | <i>Krt8</i>   | MGI:1921377 | embryo                   | weak     | TS23 | 14.5 dpc             | EMAGE:10450 |
| <i>RPS26</i>  | 12 | <i>Rps26</i>  | MGI:1351628 | embryo                   | strong   | TS23 | 14.5 dpc             | EMAGE:11827 |
| <i>ERBB3</i>  | 12 | <i>ErbB3</i>  | MGI:95411   | embryo                   | detected | TS17 | 10.5 dpc             | EMAGE:6113  |
| <i>ERBB3</i>  | 12 | <i>ErbB3</i>  | MGI:95411   | extraembryonic component | moderate | TS23 | 14.5 dpc             | EMAGE:16072 |
| <i>SPRY2</i>  | 13 | <i>Spry2</i>  | MGI:1345138 | embryo                   | detected | TS15 | 9.5 dpc              | EMAGE:4868  |
| <i>SPRY2</i>  | 13 | <i>Spry2</i>  | MGI:1345138 | embryo                   | detected | TS17 | 10.5 dpc             | EMAGE:4869  |
| <i>SPRY2</i>  | 13 | <i>Spry2</i>  | MGI:1345138 | embryo                   | detected | TS19 | 10.5 dpc             | EMAGE:4870  |
| <i>SPRY2</i>  | 13 | <i>Spry2</i>  | MGI:1345138 | embryo                   | detected | TS20 | 12.5 dpc             | EMAGE:4872  |
| <i>DICER1</i> | 14 | <i>Dicer1</i> | MGI:2177178 | embryo                   | detected | TS16 | 10.5 dpc             | EMAGE:4991  |
| <i>GSC</i>    | 14 | <i>Gsc</i>    | MGI:95841   | primitive endoderm       | detected | TS09 | 6.5 dpc              | EMAGE:89    |
| <i>GSC</i>    | 14 | <i>Gsc</i>    | MGI:95841   | embryo                   | detected | TS11 | HF Downs &<br>Davies | EMAGE:3510  |
| <i>GSC</i>    | 14 | <i>Gsc</i>    | MGI:95841   | embryo endoderm          | detected | TS11 | HF Downs &<br>Davies | EMAGE:3510  |
| <i>GSC</i>    | 14 | <i>Gsc</i>    | MGI:95841   | embryo mesoderm          | detected | TS11 | HF Downs &<br>Davies | EMAGE:3510  |
| <i>CREBBP</i> | 16 | <i>Cerbbp</i> | MGI:1098280 | embryo                   | detected | TS15 | 9.5 dpc              | EMAGE:4846  |
| <i>WNT9B</i>  | 17 | <i>Wnt9b</i>  | MGI:1197020 | embryo                   | detected | TS15 | 9.5 dpc              | EMAGE:6158  |
| <i>WNT9B</i>  | 17 | <i>Wnt9b</i>  | MGI:1197020 | embryo                   | detected | TS17 | 10.5 dpc             | EMAGE:6157  |
| <i>WNT9B</i>  | 17 | <i>Wnt9b</i>  | MGI:1197020 | embryo                   | detected | TS19 | 11.5 dpc             | EMAGE:3963  |

|                |    |              |             |                 |          |      |          |            |
|----------------|----|--------------|-------------|-----------------|----------|------|----------|------------|
| <i>WNT9B</i>   | 17 | <i>Wnt9b</i> | MGI:1197020 | embryo          | -        | TS23 | 14.5 dpc | EMAGE:9281 |
| <i>NOG</i>     | 17 | <i>Nog</i>   | MGI:104327  | embryo mesoderm | detected | TS11 | 7.75 dpc | EMAGE:747  |
| <b>cranium</b> |    |              |             |                 |          |      |          |            |
| <i>MMP16</i>   | 8  | <i>Mmp16</i> | MGI:1276107 | cranium         | strong   | TS23 | 14.5 dpc | EMAGE:7073 |
| <i>NOG</i>     | 17 | <i>Nog</i>   | MGI:104327  | viscerocranium  | weak     | TS23 | 14.5 dpc | EMAGE:8431 |

---

Data was derived from EMAGE database (<http://www.emouseatlas.org/emage/home.php>).



**Supplementary Table 12. Mutant mouse models with OFC malformations from MGI database.**

| Gene                 | Chr. | Allelic Composition<br>(Genetic Background)                                                                                                      | Annotated Term                              | Reference                | Cleft rate<br>(%) | PMID     |
|----------------------|------|--------------------------------------------------------------------------------------------------------------------------------------------------|---------------------------------------------|--------------------------|-------------------|----------|
| <b>Cleft palate:</b> |      |                                                                                                                                                  |                                             |                          |                   |          |
| <i>IRF6</i>          | 1    | <i>Irf6</i> <sup>clft1</sup> / <i>Irf6</i> <sup>clft1</sup>                                                                                      | cleft secondary palate                      | <a href="#">J:160190</a> | -                 | 20196077 |
| <i>IRF6</i>          | 1    | <i>Irf6</i> <sup>Gt(OST398253)Lex</sup> / <i>Irf6</i> <sup>Gt(OST398253)Lex</sup>                                                                | failure of palatal shelf<br>elevation       | <a href="#">J:160190</a> | -                 | 20196077 |
| <i>IRF6</i>          | 1    | <i>Irf6</i> <sup>tm1Mjd</sup> / <i>Irf6</i> <sup>tm1Mjd</sup>                                                                                    | failure of palatal shelf<br>elevation       | <a href="#">J:160190</a> | -                 | 20196077 |
| <i>IRF6</i>          | 1    | <i>Irf6</i> <sup>tm1Mjd</sup> / <i>Irf6</i> <sup>+</sup><br><i>SfnEr</i> / <i>Sfn</i> <sup>+</sup><br>(involves: 129S1/Sv * 129X1/SvJ * C57BL/6) | cleft palate                                | <a href="#">J:116077</a> | -                 | 17041603 |
| <i>IRF6</i>          | 1    | <i>Irf6</i> <sup>tm1Mjd</sup> / <i>Irf6</i> <sup>tm1Mjd</sup>                                                                                    | cleft secondary palate                      | <a href="#">J:116077</a> | -                 | 17041603 |
| <i>IRF6</i>          | 1    | <i>Irf6</i> <sup>Gt(OST398253)Lex</sup> / <i>Irf6</i> <sup>Gt(OST398253)Lex</sup><br>(involves: 129S5/SvEvBrd * C57BL/6)                         | cleft secondary palate                      | <a href="#">J:115343</a> | -                 | 17041601 |
| <i>MSX1</i>          | 4    | <i>Msx1</i> <sup>tm1Rilm</sup> / <i>Msx1</i> <sup>tm1Rilm</sup>                                                                                  | abnormal palatal shelf<br>fusion at midline | <a href="#">J:17489</a>  | 100               | 7914451  |
| <i>MSX1</i>          | 4    | (either: (involves: 129S4/SvJae- <i>Msx1</i> <sup>tm1Rilm</sup> ) or (involves: 129S4/SvJae * BALB/c) or (involves: 129X1/SvJae * C57BL/6J))     | cleft secondary palate                      | <a href="#">J:17489</a>  | 100               | 7914451  |
| <i>MSX1</i>          | 4    | <i>Dlx5</i> <sup>tm1Levi</sup> / <i>Dlx5</i> <sup>tm1Levi</sup>                                                                                  | cleft secondary palate                      | <a href="#">J:104286</a> | -                 | 16330189 |

|              |    |                                                                                                                              |                          |                          |     |          |
|--------------|----|------------------------------------------------------------------------------------------------------------------------------|--------------------------|--------------------------|-----|----------|
| <i>MSX1</i>  | 4  | Msx1 <sup>tm1Bero</sup> /Msx1 <sup>tm1Bero</sup><br>Msx1 <sup>tm1Bero</sup> /Msx1 <sup>tm1Bero</sup>                         | cleft secondary palate   | <a href="#">J:42035</a>  | 100 | 9256350  |
|              |    |                                                                                                                              |                          | <a href="#">J:104286</a> | -   | 16330189 |
|              |    | (B6.129P2-Msx1 <sup>tm1Bero</sup> )                                                                                          | palatal shelf hypoplasia | <a href="#">J:104286</a> | -   | 16330189 |
| <i>MSX1</i>  | 4  | Msx1 <sup>tm1Bero</sup> /Msx1 <sup>tm1Bero</sup><br>Msx2 <sup>tm1Bero</sup> /Msx2 <sup>tm1Yvia</sup>                         | cleft palate             | <a href="#">J:136241</a> | -   | 18442049 |
|              |    | (involves: 129/Sv * BALB/c * C57BL/6 * SJL)                                                                                  |                          |                          |     |          |
| <i>MSX1</i>  | 4  | Msx1 <sup>tm1Rem</sup> /Msx1 <sup>tm1Rem</sup><br>Tg(Msx2-cre)5Rem/0                                                         | cleft palate             | <a href="#">J:128624</a> | -   | 17654563 |
|              |    | (involves: 129S6/SvEvTac * C57BL/6 * SJL)                                                                                    |                          |                          |     |          |
| <i>MSX1</i>  | 4  | Msx1 <sup>tm2.1(cre/ERT2)Bero</sup> /Msx1 <sup>tm2.1(cre/ERT2)Bero</sup><br>Msx2 <sup>tm1Bero</sup> /Msx2 <sup>tm1Bero</sup> | cleft secondary palate   | <a href="#">J:194129</a> | -   | 23090744 |
|              |    | (involves: 129/Sv * 129P2/OlaHsd * 129S2/SvPas * C57BL/6)                                                                    |                          |                          |     |          |
| <i>FGF10</i> | 5  | Fgf10 <sup>tm1Wss</sup> /Fgf10 <sup>tm1Wss</sup>                                                                             | cleft secondary palate   | <a href="#">J:90909</a>  | 100 | 15199404 |
| <i>FGFR1</i> | 8  | Fgfr1 <sup>tm1Jpa</sup> /Fgfr1 <sup>tm1.1Jpa</sup><br>Tg(Wnt1-cre)11Rth/0                                                    | cleft palate             | <a href="#">J:81179</a>  | 80  | 12514106 |
|              |    | (involves: 129S1/Sv * 129X1/SvJ * C57BL/6 * CBA * ICR)                                                                       |                          |                          |     |          |
| <i>FGFR1</i> | 8  | Fgfr1 <sup>tm1Jpa</sup> /Fgfr1 <sup>tm1Jpa</sup><br>Tg(Wnt1-cre)11Rth/0                                                      | cleft palate             | <a href="#">J:81179</a>  | 80  | 12514106 |
|              |    | (involves: 129S1/Sv * 129X1/SvJ * C57BL/6 * CBA * ICR)                                                                       |                          |                          |     |          |
| <i>FGFR1</i> | 8  | Fgfr1 <sup>tm2rt</sup> /Fgfr1 <sup>tm2rt</sup>                                                                               | cleft palate             | <a href="#">J:81179</a>  | 80  | 12514106 |
| <i>FGFR1</i> | 8  | Pdgfratm9(Pdgfra/Fgfr1)Sor/Pdgfra+<br>(either: (involves: 129S4/SvJaeSor) or (involves: 129S4/SvJaeSor * C57BL/6))           | cleft palate             | <a href="#">J:83560</a>  | 100 | 12748302 |
| <i>MMP16</i> | 8  | Mmp16 <sup>tm1Khol</sup> /Mmp16 <sup>tm1Khol</sup>                                                                           | palatal shelf hypoplasia | <a href="#">J:130212</a> | 80  | 18022611 |
| <i>NOG</i>   | 17 | Osr2tm2(cre)Jian/Osr2+                                                                                                       | cleft palate             | <a href="#">J:149232</a> | -   | 19341725 |

|                             |       |                                                                                                                                                    |                          |                          |     |          |
|-----------------------------|-------|----------------------------------------------------------------------------------------------------------------------------------------------------|--------------------------|--------------------------|-----|----------|
|                             |       | Tg(CAG-Nog)1Ych/0<br>(involves: 129S1/Sv * 129S7/SvEvBrd * C57BL/6)                                                                                |                          |                          |     |          |
| <i>PTCH1</i>                | 9     | Ptch1 <sup>dl</sup> /Ptch1 <sup>dl</sup>                                                                                                           | absent palatal shelf     | <a href="#">J:204468</a> | 10  | 23897749 |
| <i>PTCH1</i>                | 9     | Ptch1 <sup>dl</sup> /Ptch1 <sup>tm1Mps</sup><br>(involves: 129S1/SvImJ * 129X1/SvJ * C57BL/6J)                                                     | palatal shelf hypoplasia | <a href="#">J:204468</a> | 10  | 23897749 |
| <i>VAX1</i>                 | 10    | Vax1 <sup>tm1Gr1</sup> /Vax1 <sup>tm1Gr1</sup><br>(involves: 129S1/Sv * C57BL/6)                                                                   | cleft palate             | <a href="#">J:58996</a>  | 100 | 10601035 |
| <i>VAX1</i>                 | 10    | Vax1 <sup>tm1Gr1</sup> /Vax1 <sup>tm1Gr1</sup><br>Vax2 <sup>tm1Gr1</sup> /Vax2 <sup>tm1Gr1</sup><br>(involves: 129S1/Sv)                           | cleft palate             | <a href="#">J:98488</a>  | -   | 15905411 |
| <i>VAX1</i>                 | 10    | Vax1 <sup>tm1Pgr</sup> /Vax1 <sup>tm1Pgr</sup><br>(either: (involves: 129S1/Sv * 129X1/SvJ * C57BL/6) or (involves: 129S1/Sv * 129X1/SvJ * NMRI))  | cleft palate             | <a href="#">J:58997</a>  | 100 | 10601036 |
| <i>SPRY2</i>                | 13    | Ednrbs-36Pub/Ednrbs+<br>Spry2tm1.1Mrt/Spry2+<br>(involves: 101/R1 * 129P2/OlaHsd * C3H/R1 * C57BL/6J)                                              | cleft secondary palate   | <a href="#">J:125229</a> | -   | 17693063 |
| <i>SPRY2</i>                | 13    | Ednrbs <sup>s-36Pub</sup> /Ednrbs <sup>s-36Pub</sup><br>Tg(Spry2)2Tpo/0<br>(B6.Cg-Ednrbs <sup>s-36Pub</sup> Tg(Spry2)2Tpo)                         | cleft secondary palate   | <a href="#">J:125229</a> | -   | 17693063 |
| <i>SPRY2</i>                | 13    | Ednrbs <sup>s-36Pub</sup> /Ednrbs <sup>s-36Pub</sup><br>Tg(Spry2)69Tpo/0<br>(B6.Cg-Ednrbs <sup>s-36Pub</sup> Tg(Spry2)69Tpo)                       | cleft secondary palate   | <a href="#">J:125229</a> | -   | 17693063 |
| <i>GSC</i> ;<br><i>MSX1</i> | 14; 4 | Gsc <sup>tm1Pgr</sup> /Gsc <sup>tm1Pgr</sup><br>Msx1 <sup>tm1Rilm</sup> /Msx1 <sup>tm1Rilm</sup><br>(involves: 129S1/Sv * 129S4/SvJae * 129X1/SvJ) | cleft palate             | <a href="#">J:59750</a>  | -   | 10512191 |
| <i>CREBBP</i>               | 16    | Crebbp <sup>tm2Pkb</sup> /Crebbp <sup>tm2Pkb</sup><br>(involves: 129P2/OlaHsd * C57BL/6)                                                           | cleft secondary palate   | <a href="#">J:103607</a> | 50  | 16237459 |

|              |    |                                                                                                                                                                                                           |              |                          |     |          |
|--------------|----|-----------------------------------------------------------------------------------------------------------------------------------------------------------------------------------------------------------|--------------|--------------------------|-----|----------|
| <i>WNT9B</i> | 17 | Pbx1 <sup>tm1Mlc</sup> /Pbx1 <sup>+</sup><br>Wnt9b <sup>tm1Amc</sup> /Wnt9b <sup>tm1Amc</sup><br>Foxg1 <sup>tm1</sup> (cre)Skm/Foxg1 <sup>+</sup><br>(involves: 129P2/OlaHsd * 129S6/SvEvTac * 129X1/SvJ) | cleft palate | <a href="#">J:178316</a> | 100 | 21982646 |
| <i>WNT9B</i> | 17 | Wnt9b <sup>tm1Amc</sup> /Wnt9b <sup>tm1Amc</sup><br>Foxg1 <sup>tm1</sup> (cre)Skm/Foxg1 <sup>+</sup><br>(involves: 129P2/OlaHsd * 129X1/SvJ)                                                              | cleft palate | <a href="#">J:178316</a> | 100 | 21982646 |
| <i>WNT9B</i> | 17 | Wnt9b <sup>tm1.1Amc</sup> /Wnt9b <sup>tm1.1Amc</sup><br>(involves: 129X1/SvJ * C57BL/6 * CBA)                                                                                                             | cleft palate | <a href="#">J:100575</a> | -   | 16054034 |

#### Cleft lip:

|              |    |                                                                                                                                                                                                           |                 |                          |     |          |
|--------------|----|-----------------------------------------------------------------------------------------------------------------------------------------------------------------------------------------------------------|-----------------|--------------------------|-----|----------|
| <i>WNT9B</i> | 17 | Pbx1 <sup>tm1Mlc</sup> /Pbx1 <sup>+</sup><br>Wnt9b <sup>tm1Amc</sup> /Wnt9b <sup>tm1Amc</sup><br>Foxg1 <sup>tm1</sup> (cre)Skm/Foxg1 <sup>+</sup><br>(involves: 129P2/OlaHsd * 129S6/SvEvTac * 129X1/SvJ) | cleft upper lip | <a href="#">J:178316</a> | 100 | 21982646 |
| <i>WNT9B</i> | 17 | Wnt9b <sup>tm1Amc</sup> /Wnt9b <sup>tm1Amc</sup><br>Foxg1 <sup>tm1</sup> (cre)Skm/Foxg1 <sup>+</sup><br>(involves: 129P2/OlaHsd * 129X1/SvJ)                                                              | cleft upper lip | <a href="#">J:178316</a> | -   | 21982646 |
| <i>WNT9B</i> | 17 | Wnt9b <sup>clfl</sup> /Wnt9b <sup>clfl</sup><br>(AEJ.A/Jur)                                                                                                                                               | cleft upper lip | <a href="#">J:22596</a>  | -   | 3491125  |
|              |    |                                                                                                                                                                                                           |                 | <a href="#">J:92341</a>  | 24  | 15329828 |
|              |    |                                                                                                                                                                                                           |                 | <a href="#">J:69826</a>  | 24  | 11353389 |
| <i>WNT9B</i> | 17 | Wnt9b <sup>clfl</sup> /Wnt9b <sup>clfl</sup><br>clf2/clf2<br>(AEJ.A/Jur)                                                                                                                                  | cleft upper lip | <a href="#">J:25484</a>  | 20  | 7601909  |
|              |    |                                                                                                                                                                                                           |                 | <a href="#">J:92341</a>  | 24  | 15329828 |
|              |    |                                                                                                                                                                                                           |                 | <a href="#">J:69826</a>  | 24  | 11353389 |
| <i>WNT9B</i> | 17 | Wnt9b <sup>clfl</sup> /Wnt9b <sup>clfl</sup>                                                                                                                                                              | cleft upper lip | <a href="#">J:92341</a>  | 24  | 15329828 |

|              |    |                                                                                                                        |                 |                                                     |         |                      |
|--------------|----|------------------------------------------------------------------------------------------------------------------------|-----------------|-----------------------------------------------------|---------|----------------------|
| <i>WNT9B</i> | 17 | clf2/clf2+(AEJ.A/Jur)<br>Wnt9b <sup>tm1.1Amc</sup> /Wnt9b <sup>tm1.1Amc</sup><br>(involves: 129X1/SvJ * C57BL/6 * CBA) | cleft upper lip | <a href="#">J:69826</a><br><a href="#">J:100575</a> | 24<br>- | 11353389<br>16054034 |
|--------------|----|------------------------------------------------------------------------------------------------------------------------|-----------------|-----------------------------------------------------|---------|----------------------|

---

Data was derived from the database of MGI (<http://www.informatics.jax.org/>).

**Supplementary Table 13. Syndromic OFC from OMIM database.**

| Gene          | Chr. | CL/P Syndrome                                                 | Phenotype OMIM number | Main phenotypes                                                                                                                                                                             | PMID                 | Cleft type  |
|---------------|------|---------------------------------------------------------------|-----------------------|---------------------------------------------------------------------------------------------------------------------------------------------------------------------------------------------|----------------------|-------------|
| <i>IRF6</i>   | 1    | Van der Woude syndrome                                        | <u>119300</u>         | CL/P, lip pit                                                                                                                                                                               | 12219090             | CL/P        |
|               |      | Popliteal pterygium syndrome                                  | <u>119500</u>         | popliteal/intercrural pterygium, syndactyly fingers and toes, congenital ankyloblepharon filiforme, cryptorchidism, bifid scrotum, hypoplastic vagina/uterus, lip cyst, CL/P, lip pit       | 12219090             | CL/P        |
| <i>MSX1</i>   | 4    | Tooth agenesis, selective, 1, with or without orofacial cleft | <u>106600</u>         | tooth agenesis, CL/P                                                                                                                                                                        | 10742093             | CL/P        |
| <i>TFAP2A</i> | 6    | Branchio-oculo-facial syndrome                                | <u>113620</u>         | branchial cleft sinus defects, ocular anomalies, CL/P                                                                                                                                       | 24783654             | CL/P        |
| <i>FGFR1</i>  | 8    | Hartsfield syndrome                                           | <u>615465</u>         | holoprosencephaly, ectrodactyly, mental retardation, CL/P                                                                                                                                   | 19504604             | CL/P        |
|               |      | Kallmann syndrome                                             | <u>147950</u>         | idiopathic hypogonadotropic hypogonadism, anosmia, sensorineural hearing loss, CL/P                                                                                                         | 12627230<br>15001591 | CL/P<br>CPO |
| <i>PTCH1</i>  | 9    | Gorlin syndrome                                               | <u>109400</u>         | basal cell carcinomas, jaw cysts, ovarian calcification or fibroma, ophthalmic abnormalities, CL/P                                                                                          | 8681379              | CL/P        |
| <i>VAX1</i>   | 10   | Microphthalmia, syndromic 11                                  | <u>614402</u>         | microphthalmia, small optic nerve, CLP, agenesis of corpus callosum, height in third centile, weight in third centile, head circumference in third centile                                  | 22095910             | CLP         |
| <i>RPS26</i>  | 12   | Diamond-Blackfan anemia 10                                    | <u>613309</u>         | macrocytic anemia, increased fetal hemoglobin, increased erythrocyte adenosine deaminase activity, reticulocytopenia, bone marrow shows decreased erythroid progenitors, short stature, CPO | 24942156             | CPO         |

Data was derived from Online Mendelian Inheritance In Man database (OMIM, <http://omim.org/>).

**Supplementary Table 14. Biological categories by literature review.**

| <b>Category</b>                             | <b>Chr.</b> | <b>Description</b>                                                                                                                                                    | <b>PMID</b>                               |
|---------------------------------------------|-------------|-----------------------------------------------------------------------------------------------------------------------------------------------------------------------|-------------------------------------------|
| <b><u>morphogenesis and development</u></b> |             |                                                                                                                                                                       |                                           |
| <b>bone morphogenesis</b>                   |             |                                                                                                                                                                       |                                           |
| <i>IRF6</i>                                 | 1           | mutations associated with impaired morphogenesis of the lip and palate; mutations may lead to abolish the DNA binding activity in the developing craniofacial region. | 12964020; 12219090                        |
| <i>MSX1</i>                                 | 4           | encodes a transcription factor that is highly expressed during embryogenesis and postnatal development in bone.                                                       | 24929242                                  |
| <i>MSX1</i>                                 | 4           | Mutations of the <i>MSX1</i> gene in humans are associated with cleft palate and (or) tooth agenesis.                                                                 | 24929242; 7914451                         |
| <i>MMP16</i>                                | 8           | Combined loss of MT1-MMP and MT3-MMP leads to severe craniofacial developmental defects.                                                                              | 18022611                                  |
| <i>VAX1</i>                                 | 10          | associated with non-syndromic orofacial clefts.                                                                                                                       | 25171615; 25081408; 22095910              |
| <i>SUOX</i>                                 | 12          | The findings suggest an important role for sulfite oxidase ( <i>SUOX</i> ) in bone development.                                                                       | 20865119                                  |
| <i>DICER1</i>                               | 14          | Loss of <i>Dicer1</i> activity in <i>Col2a1</i> chondrocytes causes lethal tracheomalacia.                                                                            | 21945074                                  |
| <i>WNT9B</i>                                | 17          | a role for WNT genes in the pathogenesis of cleft lip/palate.                                                                                                         | 20890934; 18413325; 18181213;<br>16998816 |
| <i>WNT9B</i>                                | 17          | regulatory link between <i>WNT9B</i> and FGF signaling during lip and upper jaw development; regulate midfacial development and lip fusion.                           | 22461561; 16496313                        |
| <i>NOG</i>                                  | 17          | too little expression of <i>NOG</i> , a growth antagonist, or overexpression of <i>GDF5</i> , a growth agonist, results in cartilage overgrowth and bony fusion.      | 17994231                                  |
| <b><u>Signaling</u></b>                     |             |                                                                                                                                                                       |                                           |
| <b>MAPK signaling</b>                       |             |                                                                                                                                                                       |                                           |
| <i>FGF2</i>                                 | 4           | <i>FGF2</i> differentiates into tenocytes and the MAPK pathway is key in differentiation.                                                                             | 24008926                                  |

|                                                           |    |                                                                                                                                                                                                                               |                    |
|-----------------------------------------------------------|----|-------------------------------------------------------------------------------------------------------------------------------------------------------------------------------------------------------------------------------|--------------------|
| <i>SPRY1</i>                                              | 4  | augmenting ERK-MAP kinase activity through inhibition of SPRY1; downstream of the GRB2-SOS complex to selectively uncouple growth factor signals from Ras activation and the MAPK pathway.                                    | 19043405; 11585837 |
| <i>FGF10</i>                                              | 5  | stimulatespreadipocyte proliferation through the Ras/MAPK pathway;also stimulates adipogenesis by inducing the expression of pRb through the Ras/MAPK pathway.                                                                | 21696361           |
| <i>FGFR1</i>                                              | 8  | FGFR1-induced epithelial to mesenchymal transition through MAPK/PLC $\gamma$ /COX-2-mediated mechanisms.                                                                                                                      | 22701738           |
| <i>GADD45G</i>                                            | 9  | Gadd45 proteins are associated with signaling mediated by p38 mitogen-activated protein kinases (MAPK). Gadd45 proteins can contribute to p38 activation either by activation of upstream kinase(s) or by direct interaction. | 24104470           |
| <i>SPRY2</i>                                              | 13 | ERK-MAPK signaling pathway was regulated by Sprouty2 ; Inactivation of Spry2 accelerates AKT-induced hepatocarcinogenesis via activation of MAPK and PKM2 pathways.                                                           | 23239100; 22617155 |
| <b>BMP signaling</b>                                      |    |                                                                                                                                                                                                                               |                    |
| <i>MSX1</i>                                               | 4  | MSX1 expression was regulated by BMP signaling, and in particular that its expression was upregulated by SMAD8 activity.                                                                                                      | 16101586           |
| <i>NOG</i>                                                | 17 | noggin inhibits BMP signaling by blocking the molecular interfaces of the binding epitopes for both type I and type II receptors.                                                                                             | 12478285           |
| <b>WNT signaling</b>                                      |    |                                                                                                                                                                                                                               |                    |
| <i>GSC</i>                                                | 14 | Higher gsc doses resulted in complete secondary axes and long-range signaling, correlating with repression of BMP and Wnt signals.                                                                                            | 19369398           |
| <i>WNT9B</i>                                              | 17 | Wnt9b signal through the canonical Wnt signaling pathway to regulate midfacial development and lip fusion.                                                                                                                    | 16496313           |
| <b>epidermal growth factor receptor signaling pathway</b> |    |                                                                                                                                                                                                                               |                    |
| <i>IRF6</i>                                               | 1  | a transcription factor required for the differentiation of skin                                                                                                                                                               | 22931925; 17041601 |
| <i>SPRY1</i>                                              | 4  | modulators and feedback inhibitors of signalling by epidermal growth factor (EGF) and fibroblast growth factor (FGF).                                                                                                         | 16954433           |
| <i>ERBB3</i>                                              | 12 | a member of the epidermal growth factor receptor family.                                                                                                                                                                      | 25000258           |
| <i>SPRY2</i>                                              | 13 | feedback regulator of EGFR trafficking and signaling; EGFR degradation through downregulation of the                                                                                                                          | 23868981; 19364817 |



EGFR-stabilizing protein Sprouty2 (Spry2).

**ERK1/2 cascade**

|              |    |                                                             |          |
|--------------|----|-------------------------------------------------------------|----------|
| <i>SPRY1</i> | 4  | deficiency led to heightened EPO/EPOR activation of Erk1/2. | 22508938 |
| <i>FGF10</i> | 5  | FGF10 mediated RAS-regulated ERK1/2 signaling.              | 21764747 |
| <i>SPRY2</i> | 13 | function to modulate signaling via the RAS/ERK1/2.          | 23150596 |

**fibroblast growth factor receptor signaling pathway**

|              |    |                                                                                                                       |                    |
|--------------|----|-----------------------------------------------------------------------------------------------------------------------|--------------------|
| <i>SPRY1</i> | 4  | modulators and feedback inhibitors of signalling by epidermal growth factor (EGF) and fibroblast growth factor (FGF). | 16954433           |
| <i>FGF10</i> | 5  | FGF10 is an FGFR ligand; Shh is a downstream target of Fgf10/Fgfr2b signaling.                                        | 15199404; 16501574 |
| <i>FGFR1</i> | 8  | FGF signaling mediates cilia length through an Fgf8/Fgf24-Fgfr1-intraflagellar transport pathway.                     | OMIM; 19242413     |
| <i>ERBB3</i> | 12 | ErbB3 is a functional component of FGFR2-amplified cell growth.                                                       | 18381441           |
| <i>SPRY2</i> | 13 | antagonism of FGF signaling.                                                                                          | 15809037           |
| <i>NOG</i>   | 17 | noggin expression is suppressed by FGF2 and syndromic FGFR signaling.                                                 | 12687003           |

**Notch signaling pathway**

|               |    |                                                                                                    |          |
|---------------|----|----------------------------------------------------------------------------------------------------|----------|
| <i>CREBBP</i> | 16 | Altered CREBBP structure resulted in changes in expression of basal levels of components of Notch. | 20207472 |
|---------------|----|----------------------------------------------------------------------------------------------------|----------|

**Rab protein signal transduction**

|              |    |                                                                      |         |
|--------------|----|----------------------------------------------------------------------|---------|
| <i>RAB5B</i> | 12 | presumably involved in vesicular trafficking at the plasma membrane. | 1541686 |
|--------------|----|----------------------------------------------------------------------|---------|

**Ras protein signal transduction**

|              |    |                                                                                                                                                                                             |                    |
|--------------|----|---------------------------------------------------------------------------------------------------------------------------------------------------------------------------------------------|--------------------|
| <i>FGF2</i>  | 4  | the FGF2-Ras-MAPK-dependent mechanism that maintains and modulates the LEC trait.                                                                                                           | 24357720           |
| <i>SPRY1</i> | 4  | inhibited the Ras/Raf (164760)/Mapk pathway by preventing Ras activation.                                                                                                                   | 11585837; 12402043 |
| <i>CDK2</i>  | 12 | ras-induced tumors are more susceptible to CDK2 ablation than myc-induced tumors; Ras, along with the activation of additional pathways, is required for the generation of G1 CDK activity. | 17942901; 9163430  |
| <i>SPRY2</i> | 13 | inhibited the Ras/Raf (164760)/Mapk pathway by preventing Ras activation.                                                                                                                   | 11585837; 12402043 |

**cell-related**

**apoptosis process**

|             |   |                           |                    |
|-------------|---|---------------------------|--------------------|
| <i>MSX1</i> | 4 | msx1 promotes cell death. | 15501222; 15705871 |
|-------------|---|---------------------------|--------------------|

|                             |    |                                                                                                                                                                                        |                                            |
|-----------------------------|----|----------------------------------------------------------------------------------------------------------------------------------------------------------------------------------------|--------------------------------------------|
| <i>CCDC26</i>               | 8  | prominent expression in embryo; Knockdown of RAM promoted 9-cis RA-induced differentiation and TRAIL-triggered apoptosis.                                                              | 16449964                                   |
| <i>GADD45G</i>              | 9  | encodes a ubiquitously expressed protein that is often induced by DNA damage and other stress signals associated with growth arrest and apoptosis.                                     | 24104470                                   |
| <i>PTCH1</i>                | 9  | Ptch1 promotes cell and tissue-specific apoptosis via its regulation of Caspase9 (Casp9) activity and mitochondrial function.                                                          | 25292199                                   |
| <i>KRT18</i>                | 12 | Keratins 8 and 18 (K8/K18) provide anti-apoptotic functions upon liver injury.                                                                                                         | 20538000                                   |
| <i>KRT8</i>                 | 12 | Keratin-deficient mice displayed significantly lower numbers of apoptotic hepatocytes than wt animals; Keratins 8 and 18 (K8/K18) provide anti-apoptotic functions upon liver injury.  | 22449798; 20538000                         |
| <i>NTN1</i>                 | 17 | functioned in cell survival by inhibiting the proapoptotic activity of Dcc.                                                                                                            | 18796601                                   |
| <b>cell cycle</b>           |    |                                                                                                                                                                                        |                                            |
| <i>IRF6</i>                 | 1  | promotes cell cycle arrest and is regulated by the proteasome in a cell cycle-dependent manner.                                                                                        | 18212048                                   |
| <i>GADD45G</i>              | 9  | cooperate in activation of S and G2/M checkpoints following exposure of cells to UV irradiation.                                                                                       | 12124778                                   |
| <i>CDK2</i>                 | 12 | cyclin E binds to CDK2 to promote the transition of cells from G1 to S phase ; cyclin A binds to CDK2 to progress the cell cycle through the S phase and G2/M transition.              | 21319273 ; 18372919; 18372919;<br>20195506 |
| <b>cell differentiation</b> |    |                                                                                                                                                                                        |                                            |
| <i>FGF2</i>                 | 4  | FGF2 was found to up-regulate to FGFR3 until the peak level of FGFR3 mRNA expression, while in hypertrophic chondrocytes, FGFR3 appeared to cause the differentiation of chondrocytes. | 15878293                                   |
| <i>FGFR1</i>                | 8  | FGFR signaling promotes chondrocyte differentiation from condensed mesenchyme.                                                                                                         | 11585811                                   |
| <i>GADD45G</i>              | 9  | GADD45G as an instructor of LT-HSC differentiation under the control of differentiation-promoting cytokine receptor signaling.                                                         | 25068120                                   |
| <i>MAFB</i>                 | 20 | down regulation of Mafb are crucial for osteoclastogenesis.                                                                                                                            | 23132958                                   |
| <b>cell division</b>        |    |                                                                                                                                                                                        |                                            |
| <i>CDK2</i>                 | 12 | regulating various events of eukaryotic cell division cycle.                                                                                                                           | 25386824                                   |
| <b>cell migration</b>       |    |                                                                                                                                                                                        |                                            |
| <i>FGF2</i>                 | 4  | up-regulatedcten modulates cell migration induced by FGF2.                                                                                                                             | 23625726                                   |

|                                      |    |                                                                                                                                                                                                                                                                                                                                    |                              |
|--------------------------------------|----|------------------------------------------------------------------------------------------------------------------------------------------------------------------------------------------------------------------------------------------------------------------------------------------------------------------------------------|------------------------------|
| <i>FGF10</i>                         | 5  | stromal FGF10 induces migration and invasion in pancreatic cancer cells through interaction with FGFR2.                                                                                                                                                                                                                            | 18594526                     |
| <i>FGFR1</i>                         | 8  | Fgfr1 patterns the pharyngeal region to create a permissive environment for neural crest cell migration.                                                                                                                                                                                                                           | 12514106                     |
| <i>NTN1</i>                          | 17 | stimulates proliferation, induces migration, and promotes adhesion of endothelial cells and vascular smooth muscle cells with a specific activity comparable to PEGF and PDGF.                                                                                                                                                     | 15520390                     |
| <b>cell proliferation</b>            |    |                                                                                                                                                                                                                                                                                                                                    |                              |
| <i>IRF6</i>                          | 1  | a key determinant of the keratinocyte proliferation-differentiation switch ; a developmental feedback regulatory loop between p63 and IRF6 for the control of proliferation of epithelial cells; a primary Notch target in keratinocytes, which contributes to the role of this pathway in differentiation and tumour suppression. | 17041603; 20424325; 21909072 |
| <i>MSX1</i>                          | 4  | Msx1/Msx2 double-null mutation prevented full activation of Stra8, a gene required for meiosis.                                                                                                                                                                                                                                    | 22071108                     |
| <i>SPRY1</i>                         | 4  | inhibit cell proliferation.                                                                                                                                                                                                                                                                                                        | 15342396                     |
| <i>MMP16</i>                         | 8  | distinct and specific functions for MT1-MMP and MT3-MMP in skeletal development.                                                                                                                                                                                                                                                   | 18470538                     |
| <i>ERBB3</i>                         | 12 | NRG1-driven/activated-ErbB3 autocrine loop in promoting cell proliferation in human ovarian cancer cells; Proliferation of Colorectal Cancer Cells is Mediated by Either ErbB3/ErbB2 or ErbB3/C-MET Signaling Pathways.                                                                                                            | 20227043; 24205104           |
| <i>SPRY2</i>                         | 13 | inhibiting Spry2 expression in renal cell carcinoma promotes proliferation ; loss of Spry2 was associated with an increase in palate mesenchymal cell proliferation.                                                                                                                                                               | 21195053; 23688375           |
| <i>NTN1</i>                          | 17 | stimulates proliferation, induces migration, and promotes adhesion of endothelial cells and vascular smooth muscle cells with a specific activity comparable to PEGF and PDGF.                                                                                                                                                     | 15520390                     |
| <b>cellular response to stimulus</b> |    |                                                                                                                                                                                                                                                                                                                                    |                              |
| <i>CREBBP</i>                        | 16 | CBP/catenin signaling in enhancing and maintaining the leukemia stem/initiating-like cell population under hypoxic conditions; induce MMP1 expression during prolonged hypoxia and regulates cell migration and invasion in cancer cells.                                                                                          | 24720539 ; 23775082          |
| <i>CREBBP</i>                        | 16 | induction of Egr1 by UV-C irradiation leads to repression of p300/CBP transcription; p300 and CBP act redundantly in UV lesions.                                                                                                                                                                                                   | 15225550; 23275565           |
| <b><u>metabolic process</u></b>      |    |                                                                                                                                                                                                                                                                                                                                    |                              |
| <i>ABCA4</i>                         | 1  | clearance of all-trans-retinal produced by the visual (retinoid) cycle required for vision.                                                                                                                                                                                                                                        | 18658157; 19304658           |

|                                            |    |                                                                                                                                                                                                    |                              |
|--------------------------------------------|----|----------------------------------------------------------------------------------------------------------------------------------------------------------------------------------------------------|------------------------------|
| <i>MMP16</i>                               | 8  | zinc-binding endopeptidases that degrade various components of the extracellular matrix.                                                                                                           | OMIM                         |
| <b><u>histone-related</u></b>              |    |                                                                                                                                                                                                    |                              |
| <i>CREBBP</i>                              | 16 | CBP and its close paralog p300 are transcriptional co-activators with intrinsic histone acetyltransferase activity.                                                                                | 22387215                     |
| <b><u>phospholipid-related process</u></b> |    |                                                                                                                                                                                                    |                              |
| <i>ABCA4</i>                               | 1  | an N-retinylidene-phosphatidylethanolamine and phosphatidylethanolamine importer.                                                                                                                  | 24097981; 22735453; 15471866 |
| <i>FGF2</i>                                | 4  | FGF2 binding phosphorylates both extracellular signal-related kinase (ERK) and focal adhesion kinase.                                                                                              | 10959077; 15174091           |
| <i>PPAPDC1B</i>                            | 8  | a novel type of mammalian phosphatidate phosphatase.                                                                                                                                               | 17590538                     |
| <i>DDHD2</i>                               | 8  | a phospholipase that hydrolyzes sn-1 ester bonds of phospholipids, producing 2-acyl-lysophospholipids and fatty acids.                                                                             | 20932832                     |
| <b><u>others</u></b>                       |    |                                                                                                                                                                                                    |                              |
| <b>eye morphogenesis</b>                   |    |                                                                                                                                                                                                    |                              |
| <i>VAX1</i>                                | 10 | critical for the development of the mammalian binocular visual system; Vax1 expressed restricted to the optic stalk.                                                                               | 25201875; 10421837           |
| <i>WNT9B</i>                               | 17 | in the ocular surface ectoderm.                                                                                                                                                                    | 16258938                     |
| <b>brain morphogenesis</b>                 |    |                                                                                                                                                                                                    |                              |
| <i>MSX1</i>                                | 4  | Driving dopaminergic neuronal differentiation of ventral mesencephalic progenitors.                                                                                                                | 18385323                     |
| <i>PTCH1</i>                               | 9  | co-ordinated development of the brain and face is dependent in part upon XIAP mediation of Hh/Ptch1-regulated cell survival and apoptosis during embryogenesis.                                    | 25292199                     |
| <i>VAX1</i>                                | 10 | regulates the guidance properties of a set of anterior midline cells that orchestrate axon trajectories in the developing mammalian forebrain.                                                     | 10601035                     |
| <i>GSC</i>                                 | 14 | the morphogenetic function of the rostral AML requires Gsc activity.                                                                                                                               | 10751169                     |
| <i>MAFB</i>                                | 20 | the dual function of Mafb in both segmentation and specification of anteroposterior identity in the hindbrain.                                                                                     | 12490204                     |
| <b>lung development</b>                    |    |                                                                                                                                                                                                    |                              |
| <i>FGF10</i>                               | 5  | serves as an essential regulator of lung and limb formation.                                                                                                                                       | 9988217; 9916808             |
| <i>SPRY2</i>                               | 13 | encode negative regulators of FGF10 mediated RAS-regulated ERK1/2 signaling, as essential for controlling airway shape change during development through an effect on mitotic spindle orientation. | 21764747                     |

**limb morphogenesis**

|               |    |                                                                                                                                                                                                      |                    |
|---------------|----|------------------------------------------------------------------------------------------------------------------------------------------------------------------------------------------------------|--------------------|
| <i>MSX1</i>   | 4  | Msx1 antagonizes the myogenic activity of Pax3 in migrating limb muscle precursors via direct protein-protein interaction.                                                                           | 10529415           |
| <i>FGF10</i>  | 5  | induces formation of the apical ectodermal ridge and is necessary for limb development.                                                                                                              | 22965740           |
| <i>FGFR1</i>  | 8  | mutations in FGFR1 and FGFR2 with disorders of limb patterning.                                                                                                                                      | 11389462           |
| <i>PTCH1</i>  | 9  | Ptch1 and Ptch2 are co-expressed in the developing mouse limb bud; modifications affecting the Ptch1 cis-regulatory landscape have contributed to evolutionary diversification of artiodactyl limbs. | 25448692; 24990743 |
| <i>DICER1</i> | 14 | essential for proper limb bud positioning.                                                                                                                                                           | 21256124           |
| <i>NOG</i>    | 17 | BMP binding affinity of site-specific variants of noggin was correlated with alterations in bone formation and apoptosis in chick limb development.                                                  | 12478285           |

**ear morphogenesis**

|               |    |                                                                                                                                                                                           |          |
|---------------|----|-------------------------------------------------------------------------------------------------------------------------------------------------------------------------------------------|----------|
| <i>MSX1</i>   | 4  | each mutant mouse displays intriguing facial abnormalities including those of middle ear ossicles.                                                                                        | 10512191 |
| <i>FGFR1</i>  | 8  | essential for the normal formation of the organ of Corti and that phenotype severity observed in Fgfr1 mutants is dependent on the dose of FGFR1.                                         | 19820032 |
| <i>SPRY2</i>  | 13 | negatively regulates FGF8 signaling during pillar cell formation and for hearing function.                                                                                                | 15809037 |
| <i>DICER1</i> | 14 | Removal of Dicer from sensory epithelium caused abnormal growth and subsequent degeneration of mechanosensory hair cells.                                                                 | 19416898 |
| <i>GSC</i>    | 14 | displays intriguing facial abnormalities including those of middle ear ossicles.                                                                                                          | 10512191 |
| <i>MAFB</i>   | 20 | loss of hindbrain kr/mafB expression in mutant mice results in an altered inductive signal from the hindbrain to the developing ear that ultimately leads to the inner ear malformations. | 16325169 |

**other organs morphogenesis**

|             |   |                                                                                                                                                                                                                                                                                                                                        |                                         |
|-------------|---|----------------------------------------------------------------------------------------------------------------------------------------------------------------------------------------------------------------------------------------------------------------------------------------------------------------------------------------|-----------------------------------------|
| <i>IRF6</i> | 1 | plays important cell-autonomous and non-cell-autonomous roles in muscular differentiation and cytoskeletal formation in the tongue; mice deficient for Irf6 have abnormal skin, limb and craniofacial development; TGF $\beta$ /SMAD4/IRF6 signaling cascade might be a well-conserved mechanism in regulating multiple organogenesis. | 15472655 ; 23451037; 17041601; 23406900 |
| <i>FGF2</i> | 4 | FGF2 delays tectal neurogenesis and, thereby, triggers a cascade of changes in tectum size and morphology.                                                                                                                                                                                                                             | 24265789                                |

|                |    |                                                                                                                                                                                                                                                     |                              |
|----------------|----|-----------------------------------------------------------------------------------------------------------------------------------------------------------------------------------------------------------------------------------------------------|------------------------------|
| <i>SPRY1</i>   | 4  | positive (GDNF) and inhibitory (Sprouty1) signals have to be finely balanced throughout renal development to prevent hypoplasia or cystic hyperplasia.                                                                                              | 17022962                     |
| <i>FGF10</i>   | 5  | Fgf10 +/- mice were found to have aplasia of lacrimal glands and hypoplasia of salivary glands.                                                                                                                                                     | 15654336                     |
| <i>GADD45G</i> | 9  | essential for primary sex determination, male fertility and testis development.                                                                                                                                                                     | 23516551                     |
| <i>RAB5B</i>   | 12 | a small GTPase protein that regulates the motility and fusion of early endosomes.                                                                                                                                                                   | 25605758                     |
| <i>ERBB3</i>   | 12 | Myocilin mediates myelination in the peripheral nervous system through ErbB2/3 signaling.                                                                                                                                                           | 23897819 ;                   |
| <i>ERBB3</i>   | 12 | NRG-1 $\beta$ /ErbB3/CREB signalling at the pre-mesoderm stage for stem cell cardiac differentiation.                                                                                                                                               | 24364879; 12134143           |
| <i>GSC</i>     | 14 | the expression of Gsc in the appendicular skeleton during mid- to late organogenesis, including in the shoulder and hip joint region, and in several ligaments and adductor muscles.                                                                | 9566956                      |
| <i>DICER1</i>  | 14 | Dicer-dependent processes in limiting the timespan of cortical neurogenesis.                                                                                                                                                                        | 24012747                     |
| <i>CREBBP</i>  | 16 | CBP/p300 and associated transcriptional co-activators exhibit distinct expression patterns during murine craniofacial and neural tube development.                                                                                                  | 19598128                     |
| <i>WNT9B</i>   | 17 | function during the early phase when the cap mesenchyme is induced to undergo morphogenesis into a nephron; convergent extension of the tubular epithelial cells; balances progenitor cell expansion and differentiation during kidney development. | 24445433; 21852398; 21350016 |
| <i>WNT9B</i>   | 17 | a common organizing signal regulating diverse components of the mammalian urogenital system.                                                                                                                                                        | 16054034                     |
| <i>NOG</i>     | 17 | In the developing frog, the noggin protein also mimics the activity of the Spemann organizer, which can make dorsal tissue out of ventral tissue.                                                                                                   | OMIM                         |
| <i>NOG</i>     | 17 | Nog(-/-) embryos displayed reduction in the dorsal foregut endoderm.                                                                                                                                                                                | GENE                         |
| <i>NOG</i>     | 17 | BMP antagonism is required in both the node and LPM to facilitate L-R axis establishment in the mammalian embryo.                                                                                                                                   | 18550712                     |

**axon guidance**

|              |    |                                                                                     |          |
|--------------|----|-------------------------------------------------------------------------------------|----------|
| <i>FGFR1</i> | 8  | FGFR1 is prominent in the cytoplasm of photoreceptors, and in their axon terminals. | 12708794 |
| <i>NTN1</i>  | 17 | attract spinal commissural axons and repel trochlear axons in vitro.                | 8978605  |

**angiogenesis**

|               |    |                                                                                                                                                                                                                                                                                                                        |                    |
|---------------|----|------------------------------------------------------------------------------------------------------------------------------------------------------------------------------------------------------------------------------------------------------------------------------------------------------------------------|--------------------|
| <i>FGF10</i>  | 5  | FGFs interact with FGF receptors, which are a family of tyrosine kinase membrane bound receptors with extracellular ligands, and trigger transducing extracellular cues to elicit diverse biological responses such as mitogenesis, angiogenesis, cell proliferation, development, differentiation and cell migration. | 25446127           |
| <i>FGFR1</i>  | 8  | angiopoietins as downstream effectors of FGFR1 activation in vivo; FGF2 induces endothelial cell migration and angiogenesis through two classes of receptors: receptor tyrosine kinases, such as FGFR1, and heparan sulfate proteoglycans, such as syndecan 4.                                                         | 17297442; 22569333 |
| <i>DICER1</i> | 14 | Dicer1 is essential for normal endothelial angiogenic processes; Dicer1-dependent miRNA expression may be a potential mechanism underlying impaired angiogenesis and cerebromicrovascular rarefaction in aging.                                                                                                        | 23239824           |

---

Data was derived from the database of Pubmed (<http://www.ncbi.nlm.nih.gov/pubmed>) and summarized from the related literature.

**Supplementary Table 15. Primer sequences.**

| SNP_ID      | 2nd-PCR                         | 1st-PCR                         | UEP_SEQ                      |
|-------------|---------------------------------|---------------------------------|------------------------------|
| rs7554547   | ACGTTGGATGTGAGGGCGAATAGATGTTGG  | ACGTTGGATGCCTCATCTGTAAAACAGGAC  | gagGACCTCCAGTATTCCTGCAAGG    |
| rs9439713   | ACGTTGGATGCCCTCTCTCTCAAATTAGG   | ACGTTGGATGTCTGTGTCCCCTGTATGG    | TCAAATTAGGTTCTGGTTGG         |
| rs742071    | ACGTTGGATGTTGCAATCCTGGTTAAGGAC  | ACGTTGGATGTTGATCCACTGTAACCGTGC  | gggTGTTGTTGCAACGGT           |
| rs11582254  | ACGTTGGATGAGTGTGAGCCACACTGTGGT  | ACGTTGGATGAGCTGCCTGTTCTGATCACT  | ggfTGAGGCCTAGCTTCAT          |
| rs1883567   | ACGTTGGATGGGGCTCTGGAGGTTCAAATC  | ACGTTGGATGCAACCCTGTCTCTAAAAAGC  | tcGGTTCAAATCCAATCCTG         |
| rs6588607   | ACGTTGGATGCTGAGTCTTCCCAATAAGC   | ACGTTGGATGGACTCATGCCTGTGATGTAG  | CCAATAAGCTACATTGAATTTTTT     |
| rs1331862   | ACGTTGGATGCCATTCATTAACCTGTTCTC  | ACGTTGGATGTAGGAGATCAGGTGCCATAC  | gtcACCTGTTCTCAGGTTAGTAAGT    |
| rs277354    | ACGTTGGATGGCTGTTAATAATTCCCAGAG  | ACGTTGGATGTAGACCACCAAAACTTGCTG  | gCCCAGAGAGAATAATCTGC         |
| rs7367789   | ACGTTGGATGTTACTCAAGGCCATATCCCC  | ACGTTGGATGGTTGTGTAAGTGTGATTGGC  | CCTGAAATACTACAGCCA           |
| rs4147827   | ACGTTGGATGCTGTAGCAGGTGAGCATTAG  | ACGTTGGATGTCTCAACCTGGGCCGAGTAT  | ggGAGCATTAGTACAATGGGCT       |
| rs17461953  | ACGTTGGATGAATCTACTTGGGAGGAAGC   | ACGTTGGATGGGCAAACCTTCTACTCATCCC | GGAAGCTGTTTCTCACA            |
| rs481931    | ACGTTGGATGTGCTGTTTCAGGGAAAGGCAC | ACGTTGGATGTCTCCAAATTCTCCCCTCCC  | tTCCAGCACACAGGGG             |
| rs4147803   | ACGTTGGATGCATCCCTGTCCTTGACGCTT  | ACGTTGGATGGTCTGAGCTGCTGAGAAAAC  | TCCTTGACGCTTAACTGC           |
| rs12047887  | ACGTTGGATGCCCTTGCCACTTGGATCTTA  | ACGTTGGATGTCAAAGCAGGGGATCCATTC  | cGTCACCTTCACAAACCTTT         |
| rs4839542   | ACGTTGGATGCTGCTTGCCATTACATGAC   | ACGTTGGATGAGAGCAAGCATTGGGCATTA  | TGTTTTTCCTCTCTGAGT           |
| rs10918593  | ACGTTGGATGATGTTGGAGATGGATGTTAC  | ACGTTGGATGCACACAACCATGGCACATAG  | cGATGGATGTTACTTCGTTT         |
| rs861020    | ACGTTGGATGTGAAAACCCAAATGGCCAAG  | ACGTTGGATGCACCTGTTGTTAATGGCTAC  | aaacTGGCCAAGACAGAAAC         |
| rs642961    | ACGTTGGATGTCTTACCCAAAGGCCTGAAG  | ACGTTGGATGGTCAAGGATAGAGCATGCTG  | tgatGCCTGAAGTAATACCCCAG      |
| rs2064163   | ACGTTGGATGGGCCTGGTGGTTAAGAAAAC  | ACGTTGGATGCAACCATGCATTAGTCCTCC  | atgtTGGTTAAGAAAACAAAATGAATTT |
| rs9430019   | ACGTTGGATGCTCTGAAACAGCAGCAGTTA  | ACGTTGGATGTTTCTTTTGACAGTACAGCC  | cATAAATTCCTTTTTTGCTACAGTTT   |
| rs11583395  | ACGTTGGATGGGGATTAAAATGGCTGAGGG  | ACGTTGGATGCGTCTTTTACAAATAACCTC  | ccgcGGGCATTTAAAAAAATTTATGCT  |
| rs201830371 | ACGTTGGATGGTTCTTAAAGCTTTGACACTC | ACGTTGGATGACTAGGAATCCCTAACCGTG  | ctcgTGAATTCATCTGCACA         |
| rs287980    | ACGTTGGATGTGACTGATGATCTTGACGTG  | ACGTTGGATGGAGCAACTCTTGCTCATTG   | aTGATGATCTTGACGTGATATAC      |



|            |                                |                                 |                             |
|------------|--------------------------------|---------------------------------|-----------------------------|
| rs287982   | ACGTTGGATGACTTGCTTCATGTGGCTTCC | ACGTTGGATGGCATTAGATGTCAGGGACAG  | ccCTCCTCTGGTTCTCTTC         |
| rs10172734 | ACGTTGGATGGTGTTTAAGCTTTCTGAGTC | ACGTTGGATGTCGGCATTAAACCTTACAGGG | GCTTTCTGAGTCTTAACCTC        |
| rs7552     | ACGTTGGATGCTTTGCTACTGGAGTCCTTT | ACGTTGGATGTCCCAGAGAGATAACACATC  | aTACTGGAGTCCTTTAACAACA      |
| rs7590255  | ACGTTGGATGGTTCTTTATCTTTGTCCTAC | ACGTTGGATGCAATCTGAAAGAACCATCCC  | gtagTTTCTCTCTCATTTCAAAGCA   |
| rs17491637 | ACGTTGGATGTTAATACAGTTTTAGATCAG | ACGTTGGATGGTGGGTCCATCAACAGAAAC  | aagACAGTTTTAGATCAGATGATT    |
| rs11677862 | ACGTTGGATGAAAGATGTTTTATGATGCC  | ACGTTGGATGGCAACTGTTTTTCCTAACTC  | ATGTTTTATGATGCCTGTATG       |
| rs12623132 | ACGTTGGATGCAAAACATGCTGCTTTAGAG | ACGTTGGATGATTCTAAAATCAACCTACC   | agTGAATACTTGGTTAGAGATGA     |
| rs6734545  | ACGTTGGATGAGAAGACTGGCTGGGAAAAG | ACGTTGGATGGGAGACATGAGGAGGAAATC  | GGCTGGGAAAAGTTGATGAG        |
| rs77866552 | ACGTTGGATGGCCAGTTACTGAATGTGGTC | ACGTTGGATGAGAGTCAGCAAGGAGAAATC  | CAGCTGTGGTTTTGTCT           |
| rs78991648 | ACGTTGGATGGCTGGCTTTAATATTTCTG  | ACGTTGGATGTGGGTCTAATTACAGTCAC   | ctaCTGTTTTTAAGACCTTTTTTCT   |
| rs1395165  | ACGTTGGATGGGTTTTGTTCTTTAACCGCC | ACGTTGGATGACAGGCAGTCTCTAGACCTC  | tcACCGCCTTCCAGCAT           |
| rs12485312 | ACGTTGGATGCTCACACTATGGGAGTAGAC | ACGTTGGATGCAACCATGCTCATCTGATAG  | ATGGGAGTAGACAGATAAGTGA      |
| rs1038294  | ACGTTGGATGGAGTTACTTACCTGAGGGTC | ACGTTGGATGAGGATATGTACCTTTGTTGC  | GTCATAGATCAATATAGTTAGAGTC   |
| rs1688766  | ACGTTGGATGATAAACTCTGGCAACCTACC | ACGTTGGATGGGCAAGACAGTAGTCTCTTC  | aacgCTGGCAACCTACCTCAGGA     |
| rs9847858  | ACGTTGGATGGAAGGTTGGCAAGTTGCATC | ACGTTGGATGCTGCCAAAGAGGAAATCGAC  | AACAGCTGCTCTTGT             |
| rs10936656 | ACGTTGGATGAGCAGAAAGGTATGAGCAGG | ACGTTGGATGCTTTTCCTCCAATGTTCCCC  | acgATAGTACATGGCATGAGTG      |
| rs17597256 | ACGTTGGATGACCAGGGAAAACATGGGTG  | ACGTTGGATGGGAGGGAGATAAATGGAATC  | ccccTGTCACCTTTCCCGACC       |
| rs7649443  | ACGTTGGATGGGTATATGACATTTCTTCC  | ACGTTGGATGAAACCACTGACAGCAATCGC  | GTTCTTCTTGGCCCTTA           |
| rs34246903 | ACGTTGGATGTTCCCACTGTTTCTGTGAG  | ACGTTGGATGGACCTATGGAGTTCTCAATG  | ggggtTGAGAATTCATTAAGGATCAC  |
| rs1907989  | ACGTTGGATGTTTGAGGCTTCTCTGATCC  | ACGTTGGATGCAGTAGAAAGGGTTCCCTTG  | TTCTCAAAGAAACATCACTG        |
| rs7692299  | ACGTTGGATGAAAGGTGCTCAATACATGGG | ACGTTGGATGCAAAACACATTCTAGTCCAGC | GGATGATGGAAAAATATTTTATTATGA |
| rs908822   | ACGTTGGATGCAGAAATGCTCCAACAGCAG | ACGTTGGATGCTGCTGCAGGGAAGCAGGG   | GGCTATCAAAGCCCC             |
| rs7686589  | ACGTTGGATGCTTCTATCAGAGTTGGTATC | ACGTTGGATGCAGTTTAGCCATGGTTTCTC  | aagcGTTGGTATCTTTAACTTGACC   |
| rs66509882 | ACGTTGGATGGTAGACCATCAAAGAGCAG  | ACGTTGGATGCCTCCCAAAGTCTGGAGT    | tgATGAGGAATTTCTAAAAGACAGATC |
| rs4417922  | ACGTTGGATGAGGTTATGGTCCACAGACAG | ACGTTGGATGTCACAGCTTCTAGTCAGCAG  | ccggCCACAGACAGTCATTTATG     |
| rs2333571  | ACGTTGGATGCATGGGTACTCTGGACAAAG | ACGTTGGATGGGACATCTTTGAATAGTGTG  | TGGAGAGGGACAGTG             |

|            |                                 |                                 |                             |
|------------|---------------------------------|---------------------------------|-----------------------------|
| rs13124707 | ACGTTGGATGCTGGCTGTCAATCTTGCAAT  | ACGTTGGATGGAGTATAGTATGATCTATG   | aaTATCTCCCTCTCTCTCTTC       |
| rs10462065 | ACGTTGGATGGTGTGGTTCTAAAGCTGCTG  | ACGTTGGATGGGTCTATAGGAGTGTGTAG   | GCTGGCAATTTAGGTG            |
| rs4242107  | ACGTTGGATGTTGGGTCTTACAGTCTAGAG  | ACGTTGGATGTCTTACTACTCCCTGTCTTC  | gTTACAGTCTAGAGAGAATAGAG     |
| rs10462084 | ACGTTGGATGTCTGCTGCCTTATTCAAGCC  | ACGTTGGATGAAAGGTAGAAGCAGACAGCC  | cttagTCAAGCCAGTACACTC       |
| rs7771515  | ACGTTGGATGAAAGGCACTGGGCTCTGAAG  | ACGTTGGATGTTCCCTTCACTACTCATTC   | tcctTGGGCTCTGAAGAAAAGAGG    |
| rs9381107  | ACGTTGGATGACTTACTACCTGCCCTGTTG  | ACGTTGGATGCATCCACTGGGATCTTTAAG  | gaggaCCTGTTGCTCAAAAAAGAG    |
| rs11965246 | ACGTTGGATGGGTTGACTCATAAGTGATGG  | ACGTTGGATGTTTCAGGTAGTGGGCACAATG | aataACACTTTTGCTACCAAAAGAAA  |
| rs12203226 | ACGTTGGATGCTCCCTACTCCCAAAATTC   | ACGTTGGATGCTTCTTAAAGACCCTAGCTC  | agcaCTAACTCCCAGTATCTCC      |
| rs10260512 | ACGTTGGATGCCCTTCTAAAGCTCAGATCC  | ACGTTGGATGGGAGATGGACTTCAGGAAAC  | tcTTTGAGATTTTCAGGAAATAGT    |
| rs76523544 | ACGTTGGATGGGAAGAAAATGTTTGTGCC   | ACGTTGGATGGAAAGTGGTCAGAGTGTGTC  | TGCCCTCTAATTTAATTCAA        |
| rs10256809 | ACGTTGGATGCTGAAGAGCTATGCAGTGGG  | ACGTTGGATGGCTATGACCATTGTGCTGAG  | CTCAGAGATGCTCCAG            |
| rs17227506 | ACGTTGGATGTCAGACAGGGCCCTATACAC  | ACGTTGGATGATCAGATTTCTGACTAGCTC  | gatagGTTTACTGGAAGACTGGAATTT |
| rs13317    | ACGTTGGATGCAAACTAGCCTCAGGTGAC   | ACGTTGGATGAAACCCAGACATGTGTCTGC  | CCTGCACTTAGAAGCAC           |
| rs3925     | ACGTTGGATGCAAGCGTTTCCAGTCTTAG   | ACGTTGGATGGATGCTCTTATCATGCACCC  | ccgtgTCCCAGTCTTAGCCCTGTGT   |
| rs12543318 | ACGTTGGATGGTTTCTTGTTACAAATGGC   | ACGTTGGATGCAGAATAGCCTGTTTTCCC   | gagTGTTACAAATGGCTTTCAT      |
| rs1034832  | ACGTTGGATGCTACAGTTCCTCAATAGGAC  | ACGTTGGATGTCATGGACACAGTTTTTAC   | ctgTTCTGGCACTATTATTCAA      |
| rs12681366 | ACGTTGGATGCAGACACCTTCTGTTAGTGG  | ACGTTGGATGGACCAATCAGTCTATGCACG  | aaTGGGGACGTTCTTTCAT         |
| rs957448   | ACGTTGGATGAGTCCTAGCTAACATAACCC  | ACGTTGGATGTAGACAGTATTCCTGAGGAG  | gAGCTAACATAACCCACCTTC       |
| rs11774066 | ACGTTGGATGTAGTCACATCTCTGGAGTTC  | ACGTTGGATGAGATGTGAGGCATCTGTCTG  | gAGAAAGCATGTCTAGACC         |
| rs1487022  | ACGTTGGATGAGCTGGAAGTCAAAGACTTG  | ACGTTGGATGGTCTGCTTTTTCAACCTGGAT | CTTGTAGATTTAGAATCCTGATAGTAA |
| rs1993392  | ACGTTGGATGACAGAATTGTGAAACCACCC  | ACGTTGGATGGCAGCCTTTTCACAACCTGG  | ACTTTGAAATAGGGGCA           |
| rs7845615  | ACGTTGGATGTTCAATTTCCACCTTGCACGC | ACGTTGGATGAAGGCACCCTGATTTGGTAG  | GAATTACCTTGTTTTGAATGG       |
| rs7017252  | ACGTTGGATGTGGGAACCTCAACACCTATG  | ACGTTGGATGGAACCCAGATCTTTCTGAC   | ccttgGCAAGGCCTTTAATATCTCG   |
| rs327753   | ACGTTGGATGAGGAAACCCCTCTCATCTAC  | ACGTTGGATGGCAGCAAAGATACTGAATGG  | CTCTCATCTACTCTCCACT         |
| rs2990600  | ACGTTGGATGGAGAAGATCAGACTCATCCC  | ACGTTGGATGGAAGTATACTCCAAAATCTG  | GATGTCTGGGTTAGCAC           |
| rs408960   | ACGTTGGATGCTGGAAGAGGAGCAGTATAA  | ACGTTGGATGGCAATAGATGATCCTCAAGC  | GGAGCAGTATAAAAAATGAGTT      |

|            |                                 |                                  |                              |
|------------|---------------------------------|----------------------------------|------------------------------|
| rs324475   | ACGTTGGATGCCCAATCAGGGTGCATTAAG  | ACGTTGGATGGATGTGAAGAGCCAGTTTTTC  | tttatTCACAAATCTTTGCATGACACT  |
| rs77401103 | ACGTTGGATGTGCTTTCCATATTTTTGACC  | ACGTTGGATGGGGTCTATTAGTTAAAAGTG   | ggggCCATATTTTTGACCCAGGAA     |
| rs542733   | ACGTTGGATGACCAAAGCTGACTCTTTGGG  | ACGTTGGATGGTTCACAAAATTTTAAGGTC   | AGGTTACAACCCTGAAG            |
| rs498010   | ACGTTGGATGATCCAGCACACTGCGCATAG  | ACGTTGGATGACTACCAACCATTGACTGGC   | CTCTCGAGTCGGAGT              |
| rs35825512 | ACGTTGGATGATAACCATTCCCCAGTAAAGG | ACGTTGGATGGTCTCACCTTATACCTTGCC   | CCCAGTAAAGGATCAGTGT          |
| rs7863754  | ACGTTGGATGTGCTGGCAAGAATGTAGAGG  | ACGTTGGATGTTCTCCACAGTGGCTGCATC   | aagcATGTAGAGGAATTGAAGCCCT    |
| rs7871395  | ACGTTGGATGACCTCCTTCCCTGCTAGAAT  | ACGTTGGATGCCAGGCAGTCTCTAAATAAG   | gaTTCCTGCTAGAATTCATTC        |
| rs10512248 | ACGTTGGATGGCAGGAGAAAAGTGGAAAGC  | ACGTTGGATGAGCCAGTCTGGTGTCTGTG    | AAACTGGAAAGCCATTTAC          |
| rs28361526 | ACGTTGGATGTGAACACTACGTCCTTAGTCC | ACGTTGGATGCTACCAGAAGCTGGGAATCG   | AATTGTATGTTTGTATCCGT         |
| rs13294988 | ACGTTGGATGCATCCCACCTTACTCTCAGC  | ACGTTGGATGAAGAGGAAAGGTTGTGGAGG   | AGGTAGTGAAAAGTACTGTTT        |
| rs474558   | ACGTTGGATGCCGTCATCCATTCCCTTAGTG | ACGTTGGATGCCAGGCTATGATGATGATGC   | ggaaTTGTTACTCAAAGTGTGGT      |
| rs6585429  | ACGTTGGATGTCTAGAGCAAACGTCCTGTG  | ACGTTGGATGAATGCCCGAGTTAGTCAACC   | atGCTGGGCACGGGGTC            |
| rs12792211 | ACGTTGGATGGCCCATGTTATTCCCTCTAC  | ACGTTGGATGCTCTCTTCCCTGTCTTGATG   | ccTCTCTGGGCCAGCTC            |
| rs3741442  | ACGTTGGATGTGTGCACAAATGCCCTAACC  | ACGTTGGATGCTTCCTTCTACACCCCAATC   | caccAATGCCCTAACCCAACAGTC     |
| rs705704   | ACGTTGGATGCAAGTGCTTAGACCGAAGGC  | ACGTTGGATGCCTCTTCGTAATCCTACACC   | TTCTCTGACAGTCCTTCTA          |
| rs2304269  | ACGTTGGATGTTTTGCGGTGAGGCGTTGAC  | ACGTTGGATGCAAACCTCCTCCGGAAACTC   | cccttACCACGCCCATATGAA        |
| rs7967428  | ACGTTGGATGCAGCCACCTTAAAATACCAC  | ACGTTGGATGCCATTCCCTCAAAGCTTGTC   | tATGAAGCAATTAATGTTTCATG      |
| rs2188380  | ACGTTGGATGCCACATTCTTCCCCAGCATT  | ACGTTGGATGTAAGACCCCCAGTTTGTGGC   | gGCATTTGGAATGGTCAATA         |
| rs12229654 | ACGTTGGATGTTATGCATAGGGTACCAGGC  | ACGTTGGATGGTTTTGGAGAAAGGTACTIONG | GTTTGAAATAATACAAATAATTTCCATA |
| rs4766453  | ACGTTGGATGCTATGTATTTAGGCACTGGG  | ACGTTGGATGTCTGCAACAGCAGCAGATGG   | gggaGAGGGCTGGCTTGATTC        |
| rs11066150 | ACGTTGGATGGCATTGAGAATGGGATTGAG  | ACGTTGGATGAAAAACCAGTTCAGAAGAC    | TGGTTTTATTTTTTATATAGTTATTGTC |
| rs12229892 | ACGTTGGATGGATGACTAGATTTAGGCTCC  | ACGTTGGATGGAGGTTTLAGAGATACCCAAG  | cctaCAATTCCAGGCACTCACACTCA   |
| rs9545308  | ACGTTGGATGCAAAAAGGTGATCCAGGTCTC | ACGTTGGATGGGAGCTTCCAAGGTCAGTAA   | aggttATCCAGGTCTCTTAGAATAA    |
| rs1168980  | ACGTTGGATGATTGAGTCCTGTGCCACAAC  | ACGTTGGATGCAATGCTGCATATGTGTACC   | aacgCAACTCACACACGCA          |
| rs17103683 | ACGTTGGATGAGGAACACGTAGGTCAGAAG  | ACGTTGGATGGTGTTCCTTTTCAGCTCAG    | ccacaAAGTGGACAAAAGCAGACA     |
| rs1956424  | ACGTTGGATGGTTATGCTTCTTATTTCCC   | ACGTTGGATGAACAGCTTGTGAGGGTGAAC   | ctGTCACTCCCCTGTCC            |

|             |                                 |                                 |                             |
|-------------|---------------------------------|---------------------------------|-----------------------------|
| rs10133673  | ACGTTGGATGCAGAGTCAGGGTTCATAGTC  | ACGTTGGATGTCCTTCGGAGCTCCTTATTC  | ggccGGGTTTCATAGTCACCACAT    |
| rs7148069   | ACGTTGGATGTACTGCTATTGCAATCACCC  | ACGTTGGATGGATGCCAAACTTTTCTTAGAG | cAATTTTGCCTCCACC            |
| rs10134081  | ACGTTGGATGCTTCCCTTTCATCACTGGAC  | ACGTTGGATGAAAGGCAAGTGCTAATGCC   | CCTCCCTGTTGCTCC             |
| rs9671386   | ACGTTGGATGGTGTGGCCTGGAATGTAA    | ACGTTGGATGGTGACTCTTCAGATAGTAGC  | tctgTTCTCTTGTTTTTCAACTCC    |
| rs1243572   | ACGTTGGATGTTCCCTCAGTAAGCAGCTTG  | ACGTTGGATGTTCCAATTGGTCTGTTTCCC  | cttcgTTGTGCAAAGCTCACTGCATTA |
| rs1243573   | ACGTTGGATGAGACAAGCTGCTTACTGAGG  | ACGTTGGATGTCTTCTTCCCACTGCTTAG   | GGGAAGGGCTAGGAC             |
| rs78512626  | ACGTTGGATGAACTGCTGTAAGGTCAGCTC  | ACGTTGGATGCAAGGAATAGCAATGTGGAG  | CTGCTATGAGGTTTTTTTTTTC      |
| rs2289187   | ACGTTGGATGTAATAACAACCTGCCCGTATG | ACGTTGGATGGCCAAAGTCAAGAATGAGG   | gggGCCCGTATGGTGACA          |
| rs6495117   | ACGTTGGATGTCTCCTGGGCAAGTGTATGT  | ACGTTGGATGGCAGATGTCTGATGTGTATC  | tCAAGTGTATGTGTGCATGG        |
| rs2283487   | ACGTTGGATGACTTTGCTCTGGAAGAAGGG  | ACGTTGGATGAAGCTTTGGAGGTGCTCCAG  | GGTTTTCCAGATGGCTC           |
| rs17136624  | ACGTTGGATGTGCTCAAGCACATTCCTTCG  | ACGTTGGATGGTTCTCTGAAAAGGCGCTG   | ctATTCCTTCGTGTTCAAGTATA     |
| rs4786640   | ACGTTGGATGGTCTCTCCCTTGAATAAAG   | ACGTTGGATGTTTCATCTACGCTCCATGGG  | ATGTCTGAGTTTTTCTCCTCAA      |
| rs7198766   | ACGTTGGATGTCCTGTCTGGGCTCCTAAA   | ACGTTGGATGGACAGCACATATGTGTGCTA  | ggtcTGCCCTGCCAGACC          |
| rs7188937   | ACGTTGGATGCTTTTTAAGTGCCACCGACC  | ACGTTGGATGACAGGTTGTGGAAGATCCTC  | gCATGTCCAATGTATCCTCTTC      |
| rs217181    | ACGTTGGATGGGGTTGAGCACATTGTGAC   | ACGTTGGATGGCTTACAGATTCAAGAATCC  | gggttAGCACATTGTGAGTGGTTA    |
| rs2872615   | ACGTTGGATGTTCTCATGGCTGCTGGTATC  | ACGTTGGATGAGGATAAAGCTGCGTGAGAC  | gcgGCATGGCTCCAATCTC         |
| rs1880646   | ACGTTGGATGGCATGGGTACTTCTTTACAC  | ACGTTGGATGCTTCCGCCCATATGTATCAG  | GAATGTGAATGCACATGTGTA       |
| rs4968247   | ACGTTGGATGCCACATCTTAATGGTCCAGG  | ACGTTGGATGCTCAATGTACTTCACCCCTC  | ttGGGTCCCAAAGGAGA           |
| rs1838105   | ACGTTGGATGGCATTTCATTATGGGTGGAC  | ACGTTGGATGTTCTGCTCTTTGGTTCCTGC  | gaTGGACTGATTGAAGTGA         |
| rs12951993  | ACGTTGGATGTTGCCAGATGAGCATGATCC  | ACGTTGGATGCTGCACAAGGCAAACCTGAC  | ATGTCCAATTCTCTGAAATC        |
| rs227731    | ACGTTGGATGACCTTGAGTATGGTATGAC   | ACGTTGGATGGAAAGCCAGCTTATCTGTTAC | gggGATGACTTTTTAGATACCACA    |
| rs3903236   | ACGTTGGATGCACAGAAGATGCAGTAAACC  | ACGTTGGATGTCTCCCTACATGAAATATGG  | AGAAGATGCAGTAAACCATTAAATA   |
| rs79280643  | ACGTTGGATGAGCTGCTACTATGAAGTTGG  | ACGTTGGATGTATTTGCTCTTTGGGGCCTC  | GAACTTGATATTGTGACTGTA       |
| rs117386717 | ACGTTGGATGCTCCATTTCTCTTTGATTCCG | ACGTTGGATGGTAACTGTCACATCCACTAC  | AAATGGTTTTATTCAAAAAGGA      |
| rs739461    | ACGTTGGATGGATCACACGAGATATTCAGC  | ACGTTGGATGGATGAGCTATAATCAGAGTC  | AAACATTTTCTTTCCATAGAAG      |
| rs6129653   | ACGTTGGATGCAGCTATGGTCAGAGGGAG   | ACGTTGGATGTGCAGGGTAGAGTGTGCGT   | ccccCTATGGTCAGAGGGAGTGGCTA  |

|             |                                 |                                 |                             |
|-------------|---------------------------------|---------------------------------|-----------------------------|
| rs6126344   | ACGTTGGATGACTAATCCCAAGGACCTCAC  | ACGTTGGATGTCACTTTCTGGAGAAGGCC   | CCTTGCCCGGTGACC             |
| rs2018054   | ACGTTGGATGGTCTACTTTCTATGCAGACAC | ACGTTGGATGTCCCAGCAACTTGGCTTTCC  | ggttATCTCTCTTTCTTTTCCCCAC   |
| rs933150    | ACGTTGGATGACTGGGTCTGTGCACAGTAG  | ACGTTGGATGATGAGCATTGATAACGGCCC  | cccgtTCTGTGCACAGTAGACCTACTA |
| rs7287092   | ACGTTGGATGTGGAAACCTTGAAGTGGGG   | ACGTTGGATGAGTCATCCTTCGGTTCTCAG  | ACTGAGGGGAGGGTC             |
| rs2073764   | ACGTTGGATGTTACCAGGGACTTGGTCTC   | ACGTTGGATGGAGGACCTTAGACCCAAGTG  | CCTCCTGCCAGCTGC             |
| rs8135014   | ACGTTGGATGATGTGCCATGTCTACTGTC   | ACGTTGGATGTGACTTGGTCGGGTACATGC  | TACCTCCCAGCCACC             |
| rs36604     | ACGTTGGATGAATGTCTCAAAGGAACCAC   | ACGTTGGATGTCCGTGTGGACAACCTAAGG  | GGGCTTTAAGACCCC             |
| rs5763674   | ACGTTGGATGCTCATCCCAATCATGGTGGC  | ACGTTGGATGTACTGCATTCCCTCTGACCTC | gggCATGGTGGCTCATCA          |
| rs11089442  | ACGTTGGATGTGCTGTTGTCAGAAGGTGTC  | ACGTTGGATGAAGGCGCACATGAACCATTC  | ccGATCGACCCGCTCCT           |
| rs2839998   | ACGTTGGATGCTCCAACACCCACAGCATTG  | ACGTTGGATGCCTGGTTTCTGAGTAAAGGC  | ctTCTCCCTGTGATAGCTT         |
| rs2072196   | ACGTTGGATGAGAGGAAATCCAAGACCCC   | ACGTTGGATGGGATGACTGAGCAGAAGAAC  | cttTCGCCTCCAATGTAAA         |
| rs117353193 | ACGTTGGATGCTAGCTACTACCAGTATGGC  | ACGTTGGATGAGTTTGTCCACCACGCTGTC  | GTCTCCACCAGAAGC             |
| rs5753388   | ACGTTGGATGCAATTACAACTAATGTCAC   | ACGTTGGATGACTAACCCTGCATTTTTGG   | ACAACTAATGTCACTTGTA         |
| rs1003480   | ACGTTGGATGGGCAGAAGTGATAGTAATCC  | ACGTTGGATGCCACTACCCTGAATATGC    | GATAGTAATCCAGGTGGAG         |
| rs2073856   | ACGTTGGATGCACCTATGCTATCACTACCC  | ACGTTGGATGCACCCAGCATGGTCCTTTG   | TTAAAGGGCAGAGGGG            |
| rs17220418  | ACGTTGGATGTACAGATTGAGAGCTTCTGC  | ACGTTGGATGCCAGCCACAATCACTCTATG  | GCTTCTGCTATTATTCCATTA       |
| rs2006771   | ACGTTGGATGTTCTCTCCTTCCTGTCCTGC  | ACGTTGGATGGGTGCCACATGAACCAAGAC  | TCCTTCACGCAGAGC             |
| rs78212183  | ACGTTGGATGCTTGGCCATCATTATCTACC  | ACGTTGGATGTCCTGCAAAGCAACTTGAGG  | gaccTCATTATCTACCCAATGCCT    |
| rs5756130   | ACGTTGGATGCTTCCGCAGCTGTTTGATGG  | ACGTTGGATGAGCTGGAGATGGACCTGAAG  | cctcaGCAGCTGTTTGATGGCTTCGTC |

---
